# Supplementary material for: Metal-free efficient synthesis of aryl sulfonamides from N -hydroxy sulfonamide and amines
Source: Royal Society of Chemistry journal article supplement (doi:10.1039/d4ob00878b), 2024-01-01

## Supporting Information

### Metal-free efficient synthesis of aryl sulfonamides from N-hydroxy sulfonamide and amines

E. V. Venkat Shivaji Ramarao,<sup>a†</sup> Jayshree Solanke,<sup>b†</sup> Rana Chatterjee,<sup>b</sup> Savita Gat,<sup>b</sup>  
Vasudevan Dhayalan,<sup>c</sup> Rambabu Dandela<sup>\*b</sup>

*<sup>a</sup>Dr Reddy's Institute of Life Sciences, University of Hyderabad Campus, Gachibowli,  
Hyderabad 500 046, India*

*<sup>b</sup>Department of Industrial and Engineering Chemistry, Institute of Chemical Technology,  
Indian Oil Odisha Campus, Samantpuri, Bhubaneswar 751013, India*

*<sup>c</sup>Department of Chemistry, National Institute of Technology Puducherry, Karaikal, 609609,  
Union Territory Puducherry, India*

#### **Table of contents**

#### **1 Experimental Section**

|                                                                        |            |
|------------------------------------------------------------------------|------------|
| <b>1.1 General information.....</b>                                    | <b>S2</b>  |
| <b>1.2 Synthesis of N-hydroxybenzenesulfonamide.....</b>               | <b>S2</b>  |
| <b>1.3 Synthesis of 1-(phenylsulfonyl)piperidine.....</b>              | <b>S2</b>  |
| <b>1.4 GC-MS spectra and data.....</b>                                 | <b>S3</b>  |
| <b>2. <sup>1</sup>H and <sup>13</sup>C data of the compounds .....</b> | <b>S3</b>  |
| <b>3. References.....</b>                                              | <b>S8</b>  |
| <b>4. Copies of <sup>1</sup>H and <sup>13</sup>C NMR Spectra.....</b>  | <b>S10</b> |

## 1. Experimental Section

### 1.1. General Information

All starting materials and commercial reagent were purchased from Alfa Aesar, Sigma Aldrich, Avra, Spectrochem, TCI. Thin Layer Chromatography plates were visualized by exposure to ultraviolet light (UV) with 254 nm of wavelength and then further analyzed by using iodine chamber. Thin-layer chromatography was performed using pre-coated plates. Column chromatography was performed in 120 to 200 mesh size silica gel. The reactions were carried out in round bottom flask and sealed tube. and all NMR spectra were recorded by Bruker Avance 400 spectrometer ( $^1\text{H}$  at 400 MHz and  $^{13}\text{C}$  at 100 MHz). Chemical shifts for  $^1\text{H}$  NMR spectra have been reported in parts per million (ppm) from tetramethylsilane with the solvent resonance as the internal standard ( $\text{CDCl}_3$ :  $\delta$  7.26 ppm). Similarly,  $^{13}\text{C}$  NMR spectra have been reported in parts per million (ppm) from tetramethylsilane with the solvent as the internal standard ( $\text{CDCl}_3$ :  $\delta$  77.0 ppm). The  $^1\text{H}$  NMR and  $^{13}\text{C}$  NMR of the known products were compared with literature reports.

### 1.2. Synthesis of N-hydroxybenzenesulfonamide (1a):

In 100 mL round bottom flask, a solution of potassium carbonate (10 mmol, 1.38 g) in water was added dropwise to a solution of hydroxyl amine hydrochloride (10 mmol, 0.695 g) in water: methanol (3:2; ~5-6 mL) at 0 °C with vigorous magnetic stirring for 1 hour. Then addition of ice-cold methanol was happened in single portion to this mixture followed by dropwise addition of toluene sulphonyl chloride (10 mmol, 1.90 g) over 1 hour. After 18 hours of stirring the mixture was filtered and methanol was removed under vacuum, the water residue extracted with ethyl acetate.

### 1.3 Synthesis of 1-(phenylsulfonyl)piperidine (3a):

In a 25 mL round bottom flask, N-hydroxybenzenesulfonamide (**1a**, 290 mg, 1 mmol), iodine (254 mg, 1 equiv.) and *tert*-butyl hydroperoxide (360 mg, 4 equiv.) was added in 2 mL 2-MeTHF solvent at normal temperature. After five minutes, piperidine (**2a**, 2 mmol, 170 mg) mixed into it. The resulting mixture was stirred at 70 °C for 6h. After the reaction completed, monitoring by TLC, 10 mL of cold water was added to the mixture, then extracted with EtOAc three times (3 × 15 mL). The extract was washed with 10%  $\text{Na}_2\text{SO}_3$  solution (w/w), dried over anhydrous  $\text{Na}_2\text{SO}_4$  and evaporation. The residue was purified by column chromatography on silica gel (petroleum ether/EtOAc) to yield the desired product **3a** as a pale-yellow solid.

## 1.4. GC-MS spectra and data:

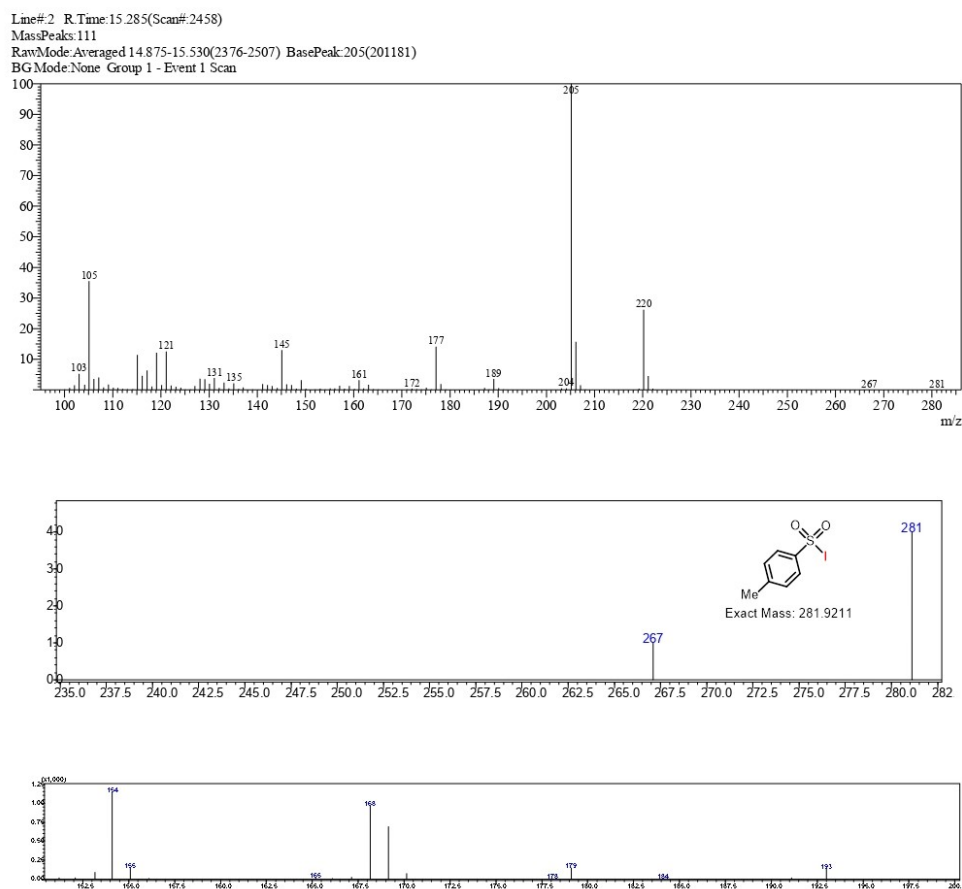

## 2. $^1\text{H}$ and $^{13}\text{C}$ data of compound:

**1-(phenylsulfonyl)piperidine (3a):**<sup>1</sup> Yield: 87%, 195 mg;  $^1\text{H}$  NMR (400 MHz,  $\text{CDCl}_3$ )  $\delta$  7.84 (dd,  $J = 7.0, 1.5$  Hz, 2H), 7.58 (dd,  $J = 5.0, 3.6$  Hz, 1H), 7.56 – 7.50 (m, 2H), 3.25 (t,  $J = 6.8$  Hz, 4H), 1.80 – 1.68 (m, 4H), 1.64 – 1.53 (m, 2H).  $^{13}\text{C}$  NMR (101 MHz,  $\text{CDCl}_3$ )  $\delta$  137.01, 132.55, 129.00, 127.50, 47.93, 25.24, 23.50.

**1-(phenylsulfonyl)pyrrolidine (3b):**<sup>1</sup> Yield: 76%, 160 mg;  $^1\text{H}$  NMR (400 MHz,  $\text{CDCl}_3$ )  $\delta$  7.94 – 7.76 (m, 2H), 7.55 (dd,  $J = 16.1, 10.0$  Hz, 3H), 3.25 (ddd,  $J = 6.8, 4.4, 2.7$  Hz, 4H), 1.87 – 1.68 (m, 4H).  $^{13}\text{C}$  NMR (101 MHz,  $\text{CDCl}_3$ )  $\delta$  137.01, 132.49, 129.00, 127.56, 48.19, 25.03.

**4-(phenylsulfonyl)morpholine (3c):**<sup>1</sup> Yield: 83%, 188 mg;  $^1\text{H}$  NMR (400 MHz,  $\text{CDCl}_3$ )  $\delta$  7.77 (dd,  $J = 8.4, 3.4$  Hz, 2H), 7.63 (dd,  $J = 9.8, 3.7$  Hz, 1H), 7.56 (dd,  $J = 7.3, 5.9$  Hz, 2H), 3.83 – 3.66 (m, 4H), 3.10 – 2.87 (m, 4H).  $^{13}\text{C}$  NMR (101 MHz,  $\text{CDCl}_3$ )  $\delta$  135.13, 133.09, 129.15, 127.85, 66.11, 46.00.

**2-(1-(phenylsulfonyl)piperidin-4-yl)-1H-benzo[d]imidazole (3d):** Yield: 73%, 248 mg, gummy mass; <sup>1</sup>H NMR (400 MHz, DMSO) δ 7.90 – 7.68 (m, 5H), 7.54 (dd, *J* = 5.9, 3.2 Hz, 2H), 7.20 (dd, *J* = 6.0, 3.2 Hz, 2H), 3.77 (d, *J* = 12.0 Hz, 2H), 2.97 (tt, *J* = 11.2, 3.7 Hz, 1H), 2.53 (dd, *J* = 11.7, 2.3 Hz, 2H), 2.19 (dd, *J* = 13.4, 2.9 Hz, 2H), 2.01 – 1.81 (m, 2H). <sup>13</sup>C NMR (101 MHz, DMSO) δ 157.14, 136.09, 134.86, 133.63, 129.91, 127.90, 122.10 (d, *J* = 9.2 Hz), 46.02, 34.81, 29.90. HRMS (ESI) calcd for C<sub>19</sub>H<sub>19</sub>N<sub>3</sub>O<sub>2</sub>S [M+H]<sup>+</sup> 342.1271; found 342.1292.

**1-(2-methoxyphenyl)-4-(phenylsulfonyl)piperazine (3e):** Yield: 71%, 235 mg, gummy mass; <sup>1</sup>H NMR (400 MHz, CDCl<sub>3</sub>) δ 7.88 – 7.72 (m, 2H), 7.57 (dt, *J* = 8.6, 7.2 Hz, 3H), 7.10 – 6.96 (m, 1H), 6.94 – 6.88 (m, 2H), 6.84 (d, *J* = 8.2 Hz, 1H), 3.80 (s, 3H), 3.17 (dt, *J* = 9.5, 4.4 Hz, 8H). <sup>13</sup>C NMR (101 MHz, CDCl<sub>3</sub>) δ 152.08, 140.27, 135.40, 132.92, 129.11, 127.92, 123.72, 121.07, 118.49, 111.13, 55.36, 50.03, 46.35. HRMS (ESI) calcd for C<sub>18</sub>H<sub>20</sub>N<sub>2</sub>O<sub>3</sub>S [M+H]<sup>+</sup> 333.1267; found 333.1278.

**1-(phenylsulfonyl)-1H-imidazole (3f):**<sup>3</sup> Yield: 78%, 162 mg; <sup>1</sup>H NMR (400 MHz, DMSO) δ 9.10 (s, 1H), 7.69 (d, *J* = 1.2 Hz, 2H), 7.63 (dd, *J* = 6.6, 3.1 Hz, 2H), 7.39 – 7.25 (m, 3H). <sup>13</sup>C NMR (101 MHz, DMSO) δ 148.66, 134.87, 129.02, 128.17, 125.94, 119.79.

**N-benzylbenzenesulfonamide (3g):**<sup>1</sup> Yield: 75%, 185 mg; <sup>1</sup>H NMR (400 MHz, CDCl<sub>3</sub>) δ 7.87 (dd, *J* = 5.3, 3.3 Hz, 2H), 7.58 (d, *J* = 7.3 Hz, 1H), 7.55 – 7.48 (m, 2H), 7.30 – 7.23 (m, 3H), 7.18 (dd, *J* = 7.3, 2.0 Hz, 2H), 4.77 (s, 1H), 4.14 (s, 2H). <sup>13</sup>C NMR (101 MHz, CDCl<sub>3</sub>) δ 139.94, 136.17, 132.73, 129.16, 128.74, 127.93 (d, *J* = 11.5 Hz), 127.13, 47.32.

**N-(2-fluorobenzyl)benzenesulfonamide (3h):** Yield: 69%, 182 mg; <sup>1</sup>H NMR (400 MHz, CDCl<sub>3</sub>) δ 7.86 – 7.78 (m, 2H), 7.51 (dd, *J* = 4.9, 3.7 Hz, 1H), 7.44 (t, *J* = 7.6 Hz, 2H), 7.22 (ddd, *J* = 15.7, 12.4, 6.3 Hz, 2H), 7.06 – 6.97 (m, 1H), 6.96 – 6.88 (m, 1H), 5.16 (t, *J* = 6.2 Hz, 1H), 4.22 (d, *J* = 6.4 Hz, 2H). <sup>13</sup>C NMR (101 MHz, CDCl<sub>3</sub>) δ 161.92, 159.47, 139.93, 132.65, 130.12 (d, *J* = 4.0 Hz), 129.75 (d, *J* = 8.2 Hz), 129.05, 127.02, 124.30 (d, *J* = 3.6 Hz), 123.44 (d, *J* = 14.4 Hz), 115.43, 115.22, 41.32 (d, *J* = 3.9 Hz). HRMS (ESI) calcd for C<sub>14</sub>H<sub>12</sub>FNO<sub>2</sub>S [M+H]<sup>+</sup> 266.0646; found 266.0659.

**N-(4-chlorobenzyl)benzenesulfonamide (3i):**<sup>1</sup> Yield: 70%, 196 mg; <sup>1</sup>H NMR (400 MHz, CDCl<sub>3</sub>) δ 7.84 (dd, *J* = 5.2, 3.3 Hz, 2H), 7.59 (ddd, *J* = 6.6, 4.4, 1.2 Hz, 1H), 7.54 – 7.46 (m, 2H), 7.25 – 7.19 (m, 2H), 7.12 (d, *J* = 8.5 Hz, 2H), 4.99 (t, *J* = 6.0 Hz, 1H), 4.11 (d, *J* = 6.3 Hz, 2H). <sup>13</sup>C NMR (101 MHz, CDCl<sub>3</sub>) δ 139.85, 134.83, 133.75, 132.81, 129.21 (d, *J* = 2.9 Hz), 128.81, 127.06, 46.56.

**N-propylbenzenesulfonamide (3j):**<sup>4</sup> Yield: 66%, 161 mg; <sup>1</sup>H NMR (400 MHz, CDCl<sub>3</sub>) δ 7.92 – 7.86 (m, 2H), 7.62 – 7.48 (m, 3H), 5.05 (t, *J* = 5.6 Hz, 1H), 2.91 (dd, *J* = 13.4, 7.0 Hz, 2H), 1.48 (dd, *J* = 14.5, 7.3 Hz, 2H), 0.86 (t, *J* = 7.4 Hz, 3H). <sup>13</sup>C NMR (101 MHz, CDCl<sub>3</sub>) δ 140.03, 132.56, 129.09, 127.02, 44.98, 22.89, 11.09.

**N-butylbenzenesulfonamide (3k):**<sup>1</sup> Yield: 63%, 134 mg; <sup>1</sup>H NMR (400 MHz, CDCl<sub>3</sub>) δ 7.88 (dd, *J* = 7.1, 1.5 Hz, 2H), 7.62 – 7.46 (m, 3H), 4.95 (s, 1H), 2.94 (dd, *J* = 12.0, 6.8 Hz, 2H), 1.52 – 1.39 (m, 2H), 1.31 – 1.24 (m, 2H), 0.83 (t, *J* = 7.3 Hz, 3H). <sup>13</sup>C NMR (101 MHz, CDCl<sub>3</sub>) δ 140.00, 132.55, 129.08, 127.13, 42.94, 31.72, 19.57, 13.64.

**N,N-diethylbenzenesulfonamide (3l):**<sup>5</sup> Yield: 68%, 144 mg; <sup>1</sup>H NMR (400 MHz, CDCl<sub>3</sub>) δ 7.81 (dd, *J* = 7.5, 2.1 Hz, 2H), 7.66 – 7.41 (m, 3H), 3.25 (q, *J* = 7.2 Hz, 4H), 1.13 (t, *J* = 7.2 Hz, 6H). <sup>13</sup>C NMR (101 MHz, CDCl<sub>3</sub>) δ 140.42, 132.24, 129.00, 126.97, 42.03, 14.12.

**1-tosylpiperidine (3m):**<sup>2</sup> Yield: 75%, 179 mg; <sup>1</sup>H NMR (400 MHz, CDCl<sub>3</sub>) δ 7.64 (d, *J* = 8.3 Hz, 2H), 7.32 (d, *J* = 8.0 Hz, 2H), 3.10 – 2.80 (m, 4H), 2.43 (s, 3H), 1.64 (dt, *J* = 11.3, 5.9 Hz, 4H), 1.47 – 1.35 (m, 2H). <sup>13</sup>C NMR (101 MHz, CDCl<sub>3</sub>) δ 143.28, 133.34, 129.54, 127.73, 46.94, 25.18, 23.54, 21.51.

**1-tosylpyrrolidine (3n):**<sup>2</sup> Yield: 71%, 159 mg; <sup>1</sup>H NMR (400 MHz, CDCl<sub>3</sub>) δ 7.72 (d, *J* = 8.2 Hz, 2H), 7.32 (d, *J* = 8.0 Hz, 2H), 3.23 (t, *J* = 6.8 Hz, 4H), 2.43 (s, 3H), 1.81 – 1.68 (m, 4H). <sup>13</sup>C NMR (101 MHz, CDCl<sub>3</sub>) δ 143.28, 133.98, 129.71, 127.58, 47.91, 25.02, 21.52.

**4-tosylmorpholine (3o):**<sup>1</sup> Yield: 73%, 175mg; <sup>1</sup>H NMR (400 MHz, CDCl<sub>3</sub>) δ 7.64 (d, *J* = 8.3 Hz, 2H), 7.35 (d, *J* = 8.0 Hz, 2H), 3.82 – 3.63 (m, 4H), 3.06 – 2.93 (m, 4H), 2.45 (s, 3H). <sup>13</sup>C NMR (101 MHz, CDCl<sub>3</sub>) δ 143.37, 133.34, 129.54, 127.84, 66.43, 46.94, 21.59.

**2-(1-tosylpiperidin-4-yl)-1H-benzo[d]imidazole (3p):** Yield: 62%, 220 mg, gummy mass; <sup>1</sup>H NMR (400 MHz, DMSO) δ 7.72 (d, *J* = 8.2 Hz, 2H), 7.52 (dd, *J* = 8.9, 3.4 Hz, 4H), 7.18 (dd, *J* = 6.0, 3.2 Hz, 2H), 3.73 (d, *J* = 11.8 Hz, 2H), 2.94 (dd, *J* = 13.1, 9.4 Hz, 1H), 2.55 – 2.48 (m, 2H), 2.47 (s, 3H), 2.18 (dd, *J* = 23.5, 10.1 Hz, 2H), 1.92 (dd, *J* = 18.1, 5.1 Hz, 2H). <sup>13</sup>C NMR (101 MHz, DMSO) δ 157.19, 143.98, 138.66 (d, *J* = 13.3 Hz), 133.14, 130.34, 127.97, 121.96, 115.01 (d, *J* = 14.4 Hz), 46.03, 34.87, 29.93, 21.49. HRMS (ESI) calcd for C<sub>20</sub>H<sub>21</sub>N<sub>3</sub>O<sub>2</sub>S [M+H]<sup>+</sup> 356.1427; found 356.1433.

**1-(2-methoxyphenyl)-4-tosylpiperazine (3q):** Yield: 64%, 221 mg; <sup>1</sup>H NMR (400 MHz, CDCl<sub>3</sub>) δ 7.67 (d, *J* = 8.2 Hz, 2H), 7.34 (d, *J* = 8.0 Hz, 2H), 7.02 (ddd, *J* = 8.1, 5.9, 3.3 Hz,

1H), 6.94 – 6.87 (m, 2H), 6.84 (d,  $J = 8.0$  Hz, 1H), 3.81 (s, 3H), 3.13 (dd,  $J = 15.4, 10.5$  Hz, 8H), 2.44 (s, 3H).  $^{13}\text{C}$  NMR (101 MHz,  $\text{CDCl}_3$ )  $\delta$  152.09, 143.75, 140.33, 132.32, 129.69, 127.98, 123.67, 121.06, 118.48, 111.13 (s), 55.35, 50.02, 46.35, 21.51. HRMS (ESI) calcd for  $\text{C}_{19}\text{H}_{22}\text{N}_2\text{O}_3\text{S}$   $[\text{M}+\text{H}]^+$  347.1424; found 356.1434.

**1-tosyl-1H-imidazole (3r):**<sup>3</sup> Yield: 70%, 155 mg;  $^1\text{H}$  NMR (400 MHz, DMSO)  $\delta$  9.10 (s, 1H), 7.69 (s, 2H), 7.51 (d,  $J = 8.1$  Hz, 2H), 7.13 (d,  $J = 7.9$  Hz, 2H), 2.29 (s, 3H).  $^{13}\text{C}$  NMR (101 MHz, DMSO)  $\delta$  145.78, 138.31, 134.86, 128.62, 125.96, 119.79, 21.88 (d,  $J = 128.3$  Hz).

**N-benzyl-4-methylbenzenesulfonamide (3s):**<sup>2</sup> Yield: 73%, 190 mg;  $^1\text{H}$  NMR (400 MHz,  $\text{CDCl}_3$ )  $\delta$  7.79 – 7.73 (m, 2H), 7.34 – 7.25 (m, 5H), 7.19 (dd,  $J = 7.6, 1.9$  Hz, 2H), 4.65 (s, 1H), 4.12 (d,  $J = 6.2$  Hz, 2H), 2.44 (s, 3H).  $^{13}\text{C}$  NMR (101 MHz,  $\text{CDCl}_3$ )  $\delta$  143.56, 136.88, 136.26, 129.77, 128.73, 127.92 (d,  $J = 7.1$  Hz), 127.21, 47.31, 21.37.

**N-(2-fluorobenzyl)-4-methylbenzenesulfonamide (3t):**<sup>6</sup> Yield: 84%, 166 mg;  $^1\text{H}$  NMR (400 MHz,  $\text{CDCl}_3$ )  $\delta$  7.71 (d,  $J = 8.3$  Hz, 2H), 7.22 (dd,  $J = 19.5, 8.0$  Hz, 4H), 7.03 (t,  $J = 7.5$  Hz, 1H), 6.99 – 6.83 (m, 1H), 4.99 (s, 1H), 4.20 (s, 2H), 2.40 (s, 3H).  $^{13}\text{C}$  NMR (101 MHz,  $\text{CDCl}_3$ )  $\delta$  161.93, 159.48, 143.48, 136.89, 130.13 (d,  $J = 4.0$  Hz), 129.81 – 129.53 (m), 127.11, 124.30 (d,  $J = 3.6$  Hz), 123.57 (d,  $J = 14.4$  Hz), 115.42, 115.21, 41.29 (d,  $J = 3.9$  Hz), 21.51.

**N-(4-chlorobenzyl)-4-methylbenzenesulfonamide (3u):**<sup>2</sup> Yield: 69%, 203 mg;  $^1\text{H}$  NMR (400 MHz,  $\text{CDCl}_3$ )  $\delta$  7.72 (d,  $J = 8.3$  Hz, 2H), 7.29 (d,  $J = 8.0$  Hz, 2H), 7.23 (d,  $J = 8.5$  Hz, 2H), 7.13 (d,  $J = 8.5$  Hz, 2H), 4.94 (s, 1H), 4.09 (s, 2H), 2.44 (s, 3H).  $^{13}\text{C}$  NMR (101 MHz,  $\text{CDCl}_3$ )  $\delta$  143.69, 136.82, 134.91, 133.73, 129.78, 129.23, 128.79, 127.15, 46.56, 21.55.

**N-butyl-4-methylbenzenesulfonamide (3v):**<sup>2</sup> Yield: 65%, 147 mg;  $^1\text{H}$  NMR (400 MHz,  $\text{CDCl}_3$ )  $\delta$  7.68 (d,  $J = 8.3$  Hz, 2H), 7.23 (d,  $J = 8.0$  Hz, 2H), 4.72 (t,  $J = 5.7$  Hz, 1H), 2.84 (dd,  $J = 13.3, 6.8$  Hz, 2H), 2.35 (s, 3H), 1.41 – 1.31 (m, 2H), 1.21 (dq,  $J = 14.2, 7.3$  Hz, 2H), 0.76 (t,  $J = 7.3$  Hz, 3H).  $^{13}\text{C}$  NMR (101 MHz,  $\text{CDCl}_3$ )  $\delta$  142.27, 135.98, 128.65, 126.08, 41.89, 30.53, 20.48, 18.72, 12.50.

**1-((4-bromophenyl)sulfonyl)piperidine (3w):**<sup>3</sup> Yield: 72%, 217 mg;  $^1\text{H}$  NMR (400 MHz,  $\text{CDCl}_3$ )  $\delta$  7.74 – 7.55 (m, 2H), 3.05 – 2.90 (m, 2H), 1.64 (t,  $J = 11.4$  Hz, 2H), 1.50 – 1.36 (m, 1H).  $^{13}\text{C}$  NMR (101 MHz,  $\text{CDCl}_3$ )  $\delta$  135.49, 132.26, 129.16, 127.59, 46.92, 25.14, 23.46.

**4-((4-nitrophenyl)sulfonyl)morpholine (3x):**<sup>5</sup> Yield: 62%, 168 mg; <sup>1</sup>H NMR (400 MHz, DMSO)  $\delta$  8.57 – 8.36 (m, 2H), 8.09 – 7.93 (m, 2H), 3.67 – 3.62 (m, 4H), 3.02 – 2.88 (m, 4H). <sup>13</sup>C NMR (101 MHz, DMSO)  $\delta$  150.68, 140.78, 129.67, 125.23, 65.76, 46.25.

**4-tosylthiomorpholine (3y):**<sup>7</sup> Yield: 68%, 174 mg; <sup>1</sup>H NMR (400 MHz, CDCl<sub>3</sub>)  $\delta$  7.62 (d,  $J$  = 8.3 Hz, 2H), 7.33 (d,  $J$  = 8.0 Hz, 2H), 3.42 – 3.25 (m, 4H), 2.76 – 2.64 (m, 4H), 2.44 (s, 3H). <sup>13</sup>C NMR (101 MHz, CDCl<sub>3</sub>)  $\delta$  143.78, 133.74, 129.81, 127.44, 47.86, 27.32, 21.53.

**4-((4-bromophenyl)sulfonyl)thiomorpholine (3z):**<sup>7</sup> Yield: 65%, 208 mg; <sup>1</sup>H NMR (400 MHz, CDCl<sub>3</sub>)  $\delta$  7.69 (d,  $J$  = 8.7 Hz, 1H), 7.60 (d,  $J$  = 8.7 Hz, 1H), 3.41 – 3.25 (m, 2H), 2.78 – 2.64 (m, 2H). <sup>13</sup>C NMR (101 MHz, CDCl<sub>3</sub>)  $\delta$  135.96, 132.54, 128.88, 128.02, 47.85, 27.31.

**4-methyl-N,N-dipropylbenzenesulfonamide (3aa):**<sup>7</sup> Yield: 56%, 142 mg; <sup>1</sup>H NMR (400 MHz, CDCl<sub>3</sub>)  $\delta$  7.75 (d,  $J$  = 8.3 Hz, 2H), 7.25 (dd,  $J$  = 8.5, 0.5 Hz, 2H), 3.40 – 3.32 (m, 2H), 3.28 – 3.24 (m, 2H), 2.40 (s, 3H), 1.67 – 1.54 (m, 4H), 0.94 – 0.85 (m, 6H). <sup>13</sup>C NMR (101 MHz, CDCl<sub>3</sub>)  $\delta$  142.24, 139.79, 129.27, 126.33, 54.26, 21.90, 19.96, 11.19.

**4-((2,4-difluorophenyl)sulfonyl)morpholine (3ab):** Yield: 63%, 165 mg, gummy mass; <sup>1</sup>H NMR (400 MHz, CDCl<sub>3</sub>)  $\delta$  7.86 (td,  $J$  = 8.2, 6.2 Hz, 1H), 7.08 – 6.95 (m, 2H), 3.78 – 3.73 (m, 4H), 3.18 (dd,  $J$  = 4.8, 3.7 Hz, 4H). <sup>13</sup>C NMR (101 MHz, CDCl<sub>3</sub>)  $\delta$  167.20 (d,  $J$  = 11.4 Hz), 164.63 (d,  $J$  = 11.4 Hz), 161.17 (d,  $J$  = 12.8 Hz), 158.60 (d,  $J$  = 12.8 Hz), 133.14 (dd,  $J$  = 10.5, 2.1 Hz), 121.22 (dd,  $J$  = 15.0, 4.0 Hz), 112.10 (dd,  $J$  = 21.8, 3.8 Hz), 106.16, 105.90, 105.64, 66.31, 45.76. HRMS (ESI) calcd for C<sub>10</sub>H<sub>12</sub>F<sub>2</sub>NO<sub>3</sub>S [M+H]<sup>+</sup> 264.2663; found 264.2671.

**4-((2-bromophenyl)sulfonyl)morpholine (3ac):**<sup>8</sup> Yield: 60%, 182 mg; <sup>1</sup>H NMR (400 MHz, CDCl<sub>3</sub>)  $\delta$  8.25 (dd,  $J$  = 7.9, 1.7 Hz, 1H), 7.68 (dd,  $J$  = 7.9, 1.1 Hz, 1H), 7.45 (td,  $J$  = 7.7, 1.2 Hz, 1H), 7.39 – 7.34 (m, 1H), 3.81 – 3.75 (m, 4H), 3.61 – 3.55 (m, 4H). <sup>13</sup>C NMR (101 MHz, CDCl<sub>3</sub>)  $\delta$  140.39, 134.96, 133.27, 130.67, 127.71, 120.28, 65.80, 44.70.

### 3. References:

1. S. Chung and J. Kim, *Tetrahedron Lett.*, 2019, **60**, 792.
2. M. Zhu, W. Wei, D. Yang, H. Cui, L. Wang, G. Meng and H. Wang, *Org. Biomol. Chem.*, 2017, **15**, 4789.
3. S. K. R. Parumala and R. K. Peddinti, *Tetrahedron Lett.*, 2016, **57**, 1232.
4. J. K. Laha, and S. Sharma, N. Dayal, *Eur. J. Org. Chem.*, 2015, **2015**, 7885.
5. K. Yang, M. Ke, Y. Lin and Q. Song, *Green Chem.*, 2015, **17**, 1395.
6. T. Verdelet, R. M. Ward and D. G. Hall, *Eur. J. Org. Chem.*, 2017, **2017**, 5729.
7. C, Buathongjan, D, Beukeaw and S, Yotphan, *Eur. J. Org. Chem.*, 2015, **2015**, 1575.
8. S. Yotphan, L. Sumunnee, D. Beukeaw, C. Buathongjan, and V. Reutrakul, *Org. Biomol. Chem.*, 2016, **14**, 590.



## **$^1\text{H}$ and $^{13}\text{C}$ NMR Spectra of Compounds**

DRB-JS-30

7.85  
7.85  
7.83  
7.83  
7.80  
7.80  
7.58  
7.58  
7.55  
7.55  
7.54  
7.54  
7.51  
7.51

3.27  
3.25  
3.24

1.77  
1.75  
1.74  
1.64  
1.59  
1.56  
1.54

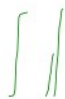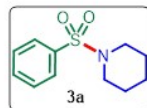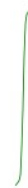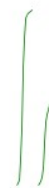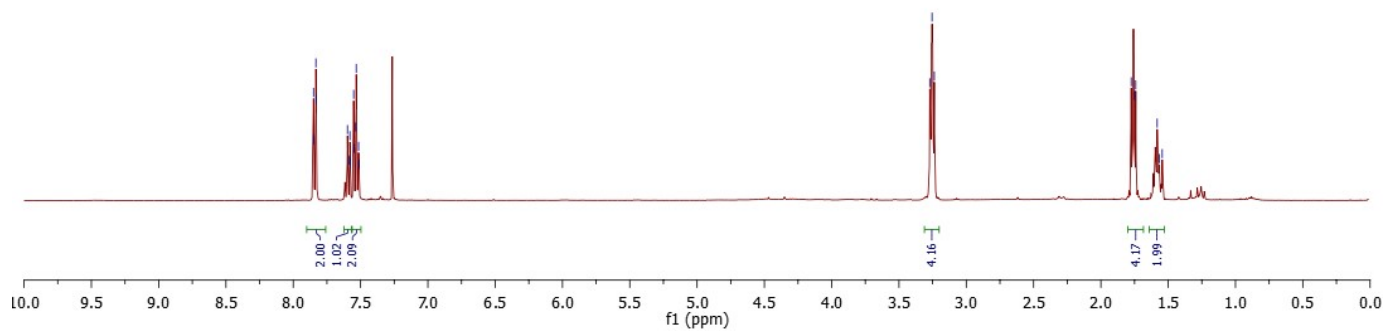

DRB-JS-30

137.01  
132.55  
129.00  
127.50

47.93

25.24  
23.50

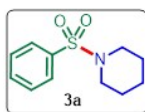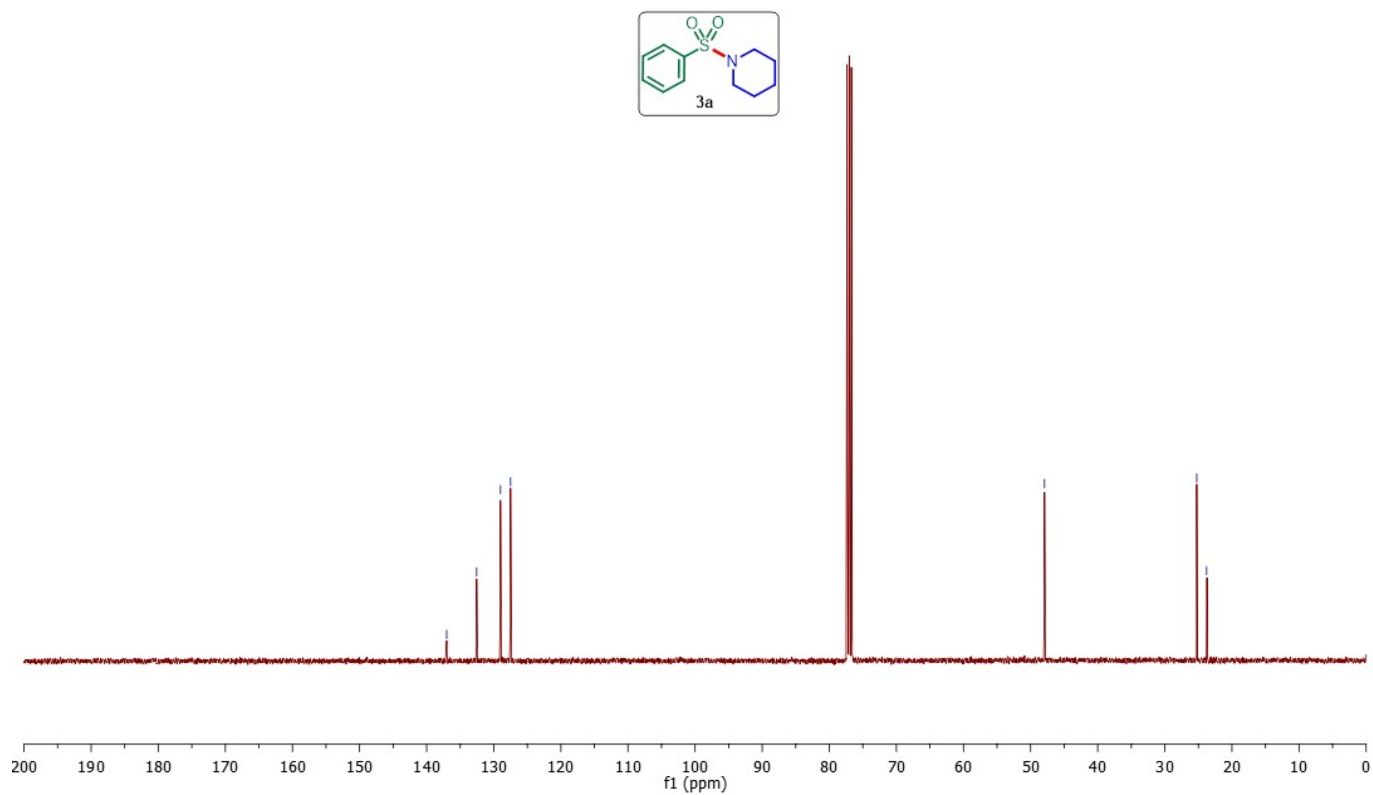

DRB-JS-30

7.85  
7.83  
7.80  
7.55  
7.54  
7.53

3.37  
3.36  
3.35  
3.25  
3.24  
3.24

1.77  
1.77  
1.76  
1.75  
1.74

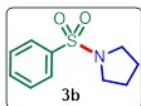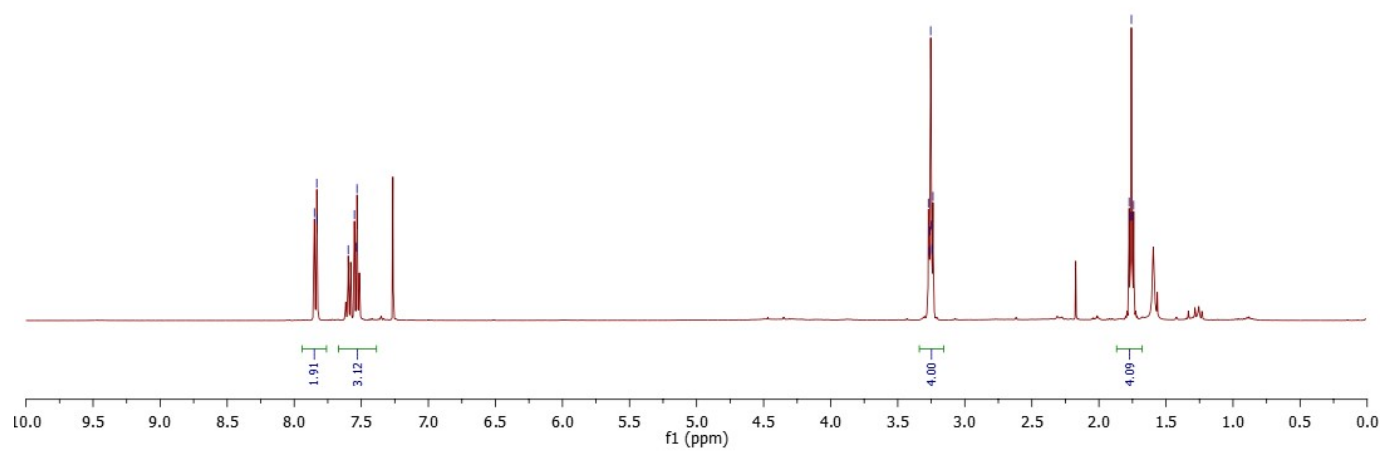

DRB-JS-30

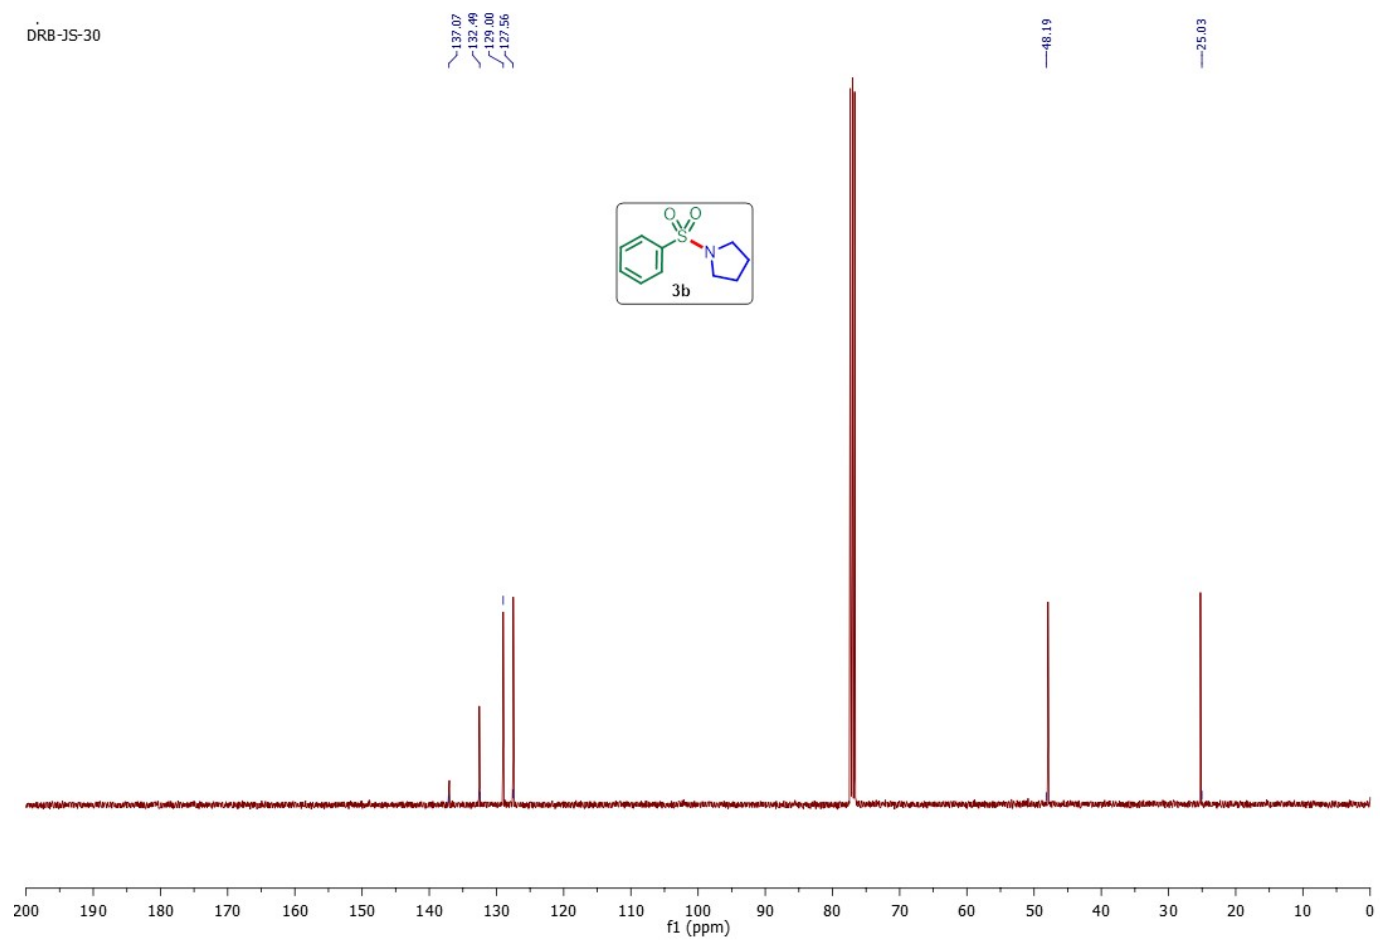

DRB-JS-23

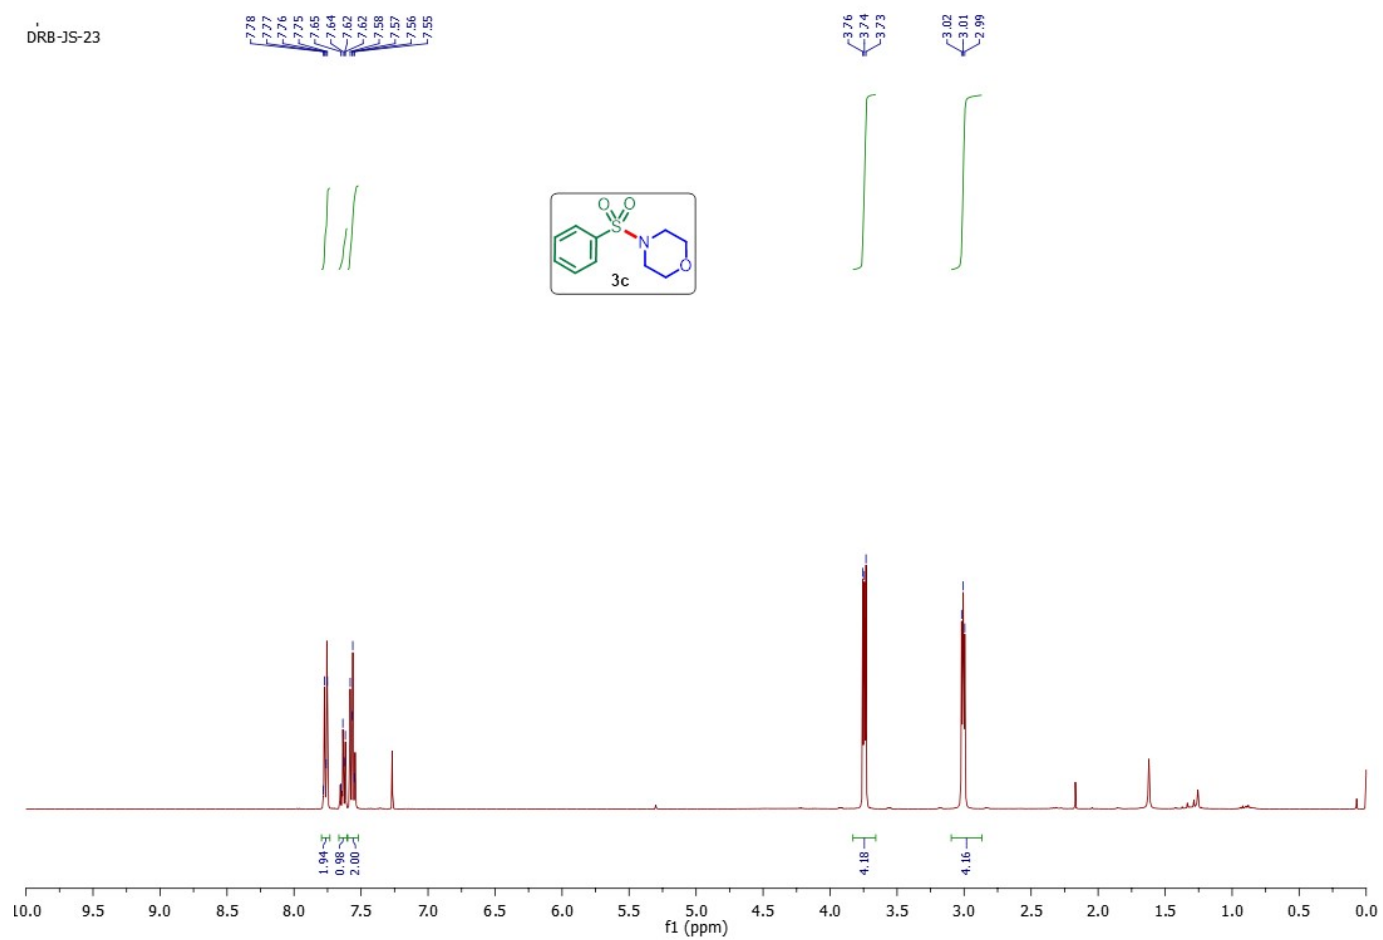

DRB-JS-23

135.13  
133.09  
129.15  
127.85

66.11

46.00

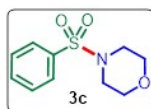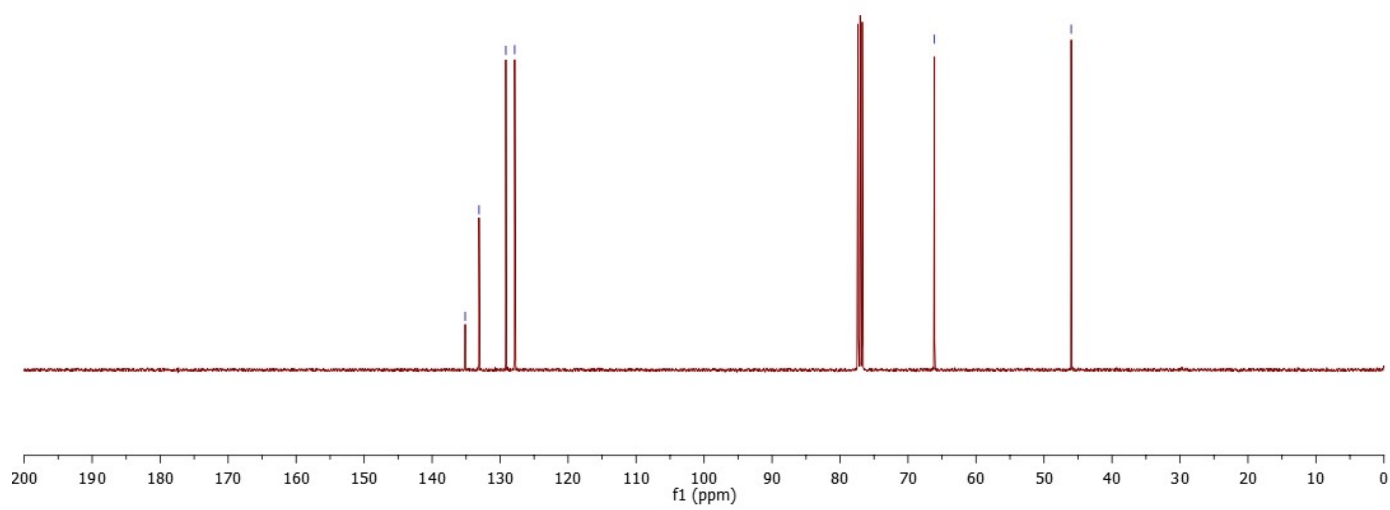

DRB-JS-56

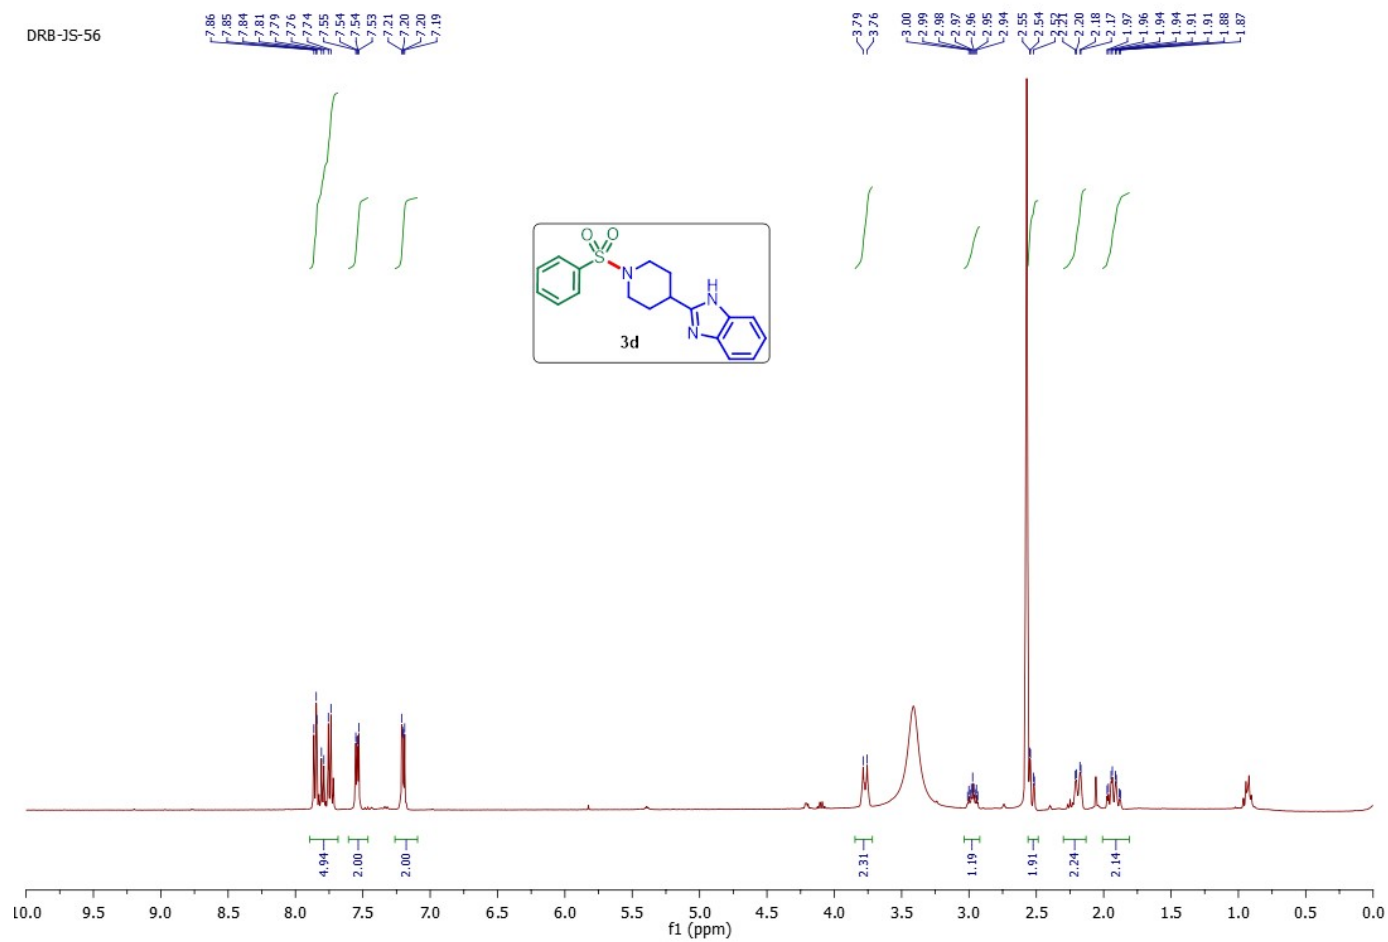



DRB-JS-56

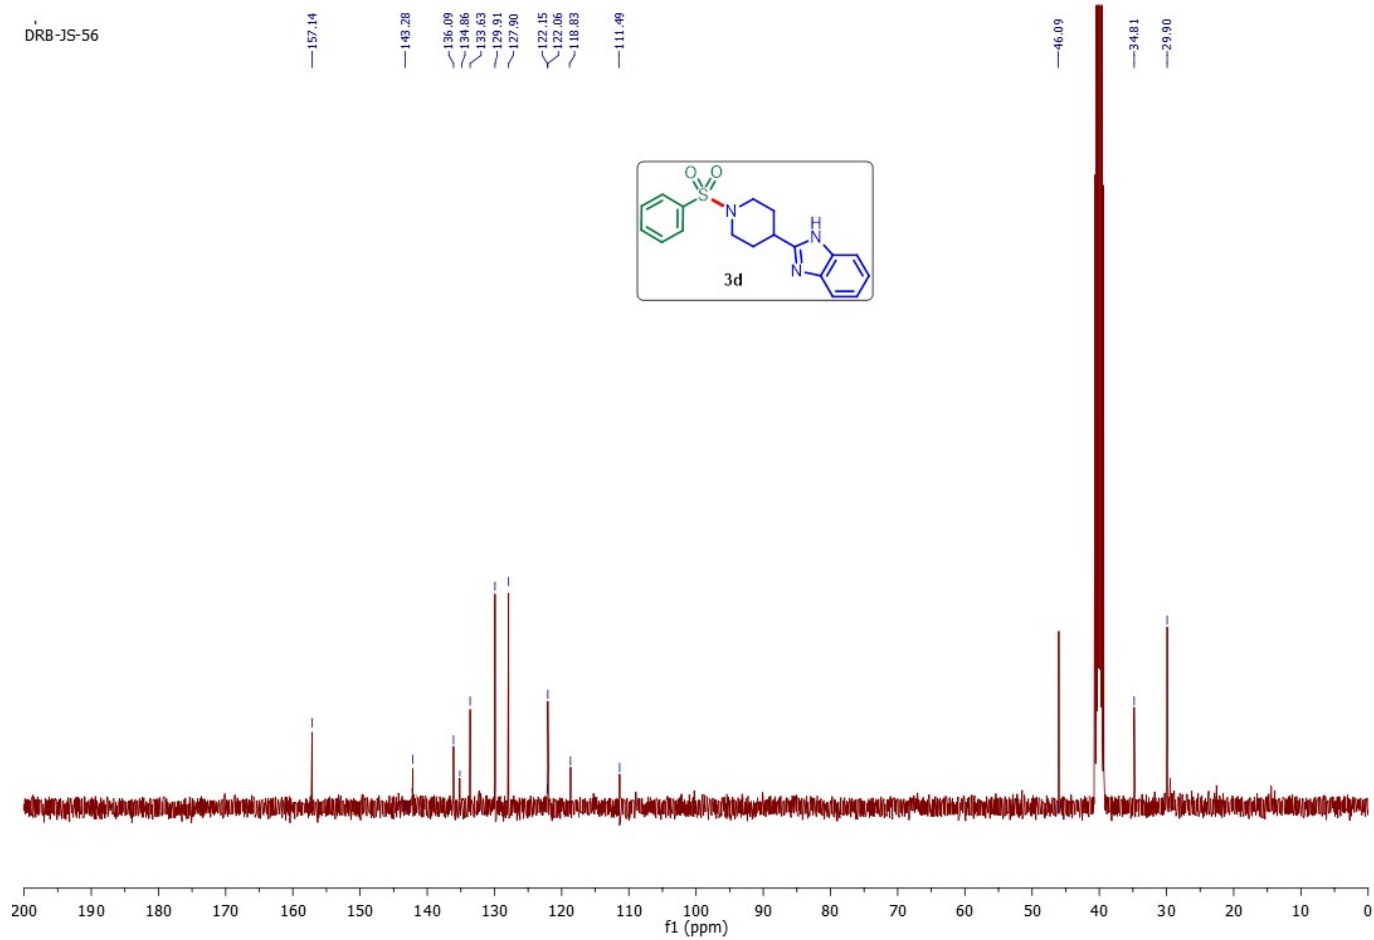

DRB-JS-57

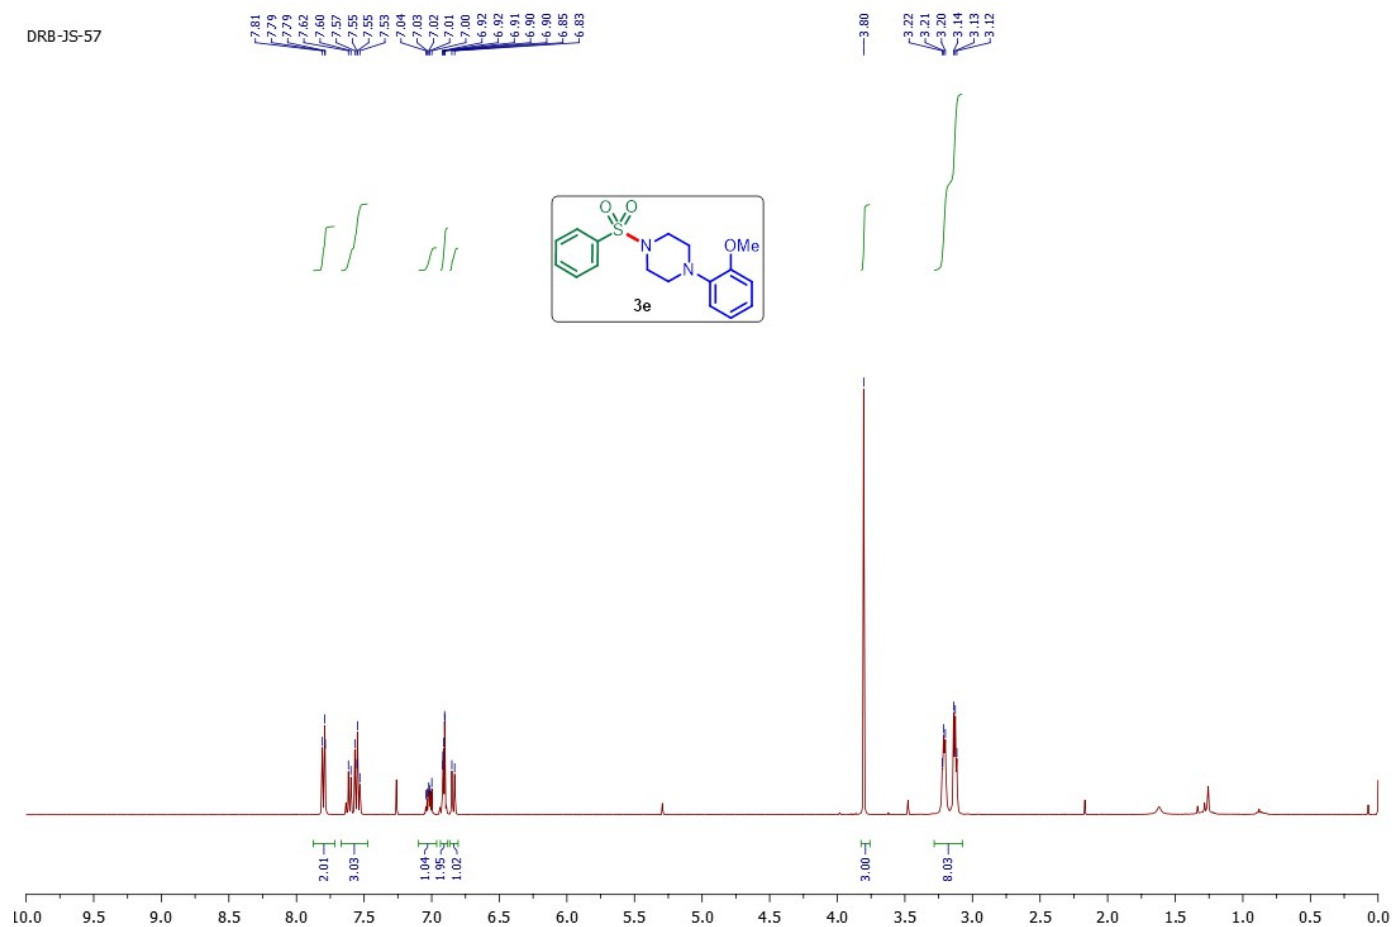

DRB-JS-57

152.08  
140.27  
135.40  
132.92  
129.11  
127.92  
123.72  
121.07  
118.49  
111.13

55.36  
50.03  
46.35

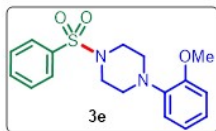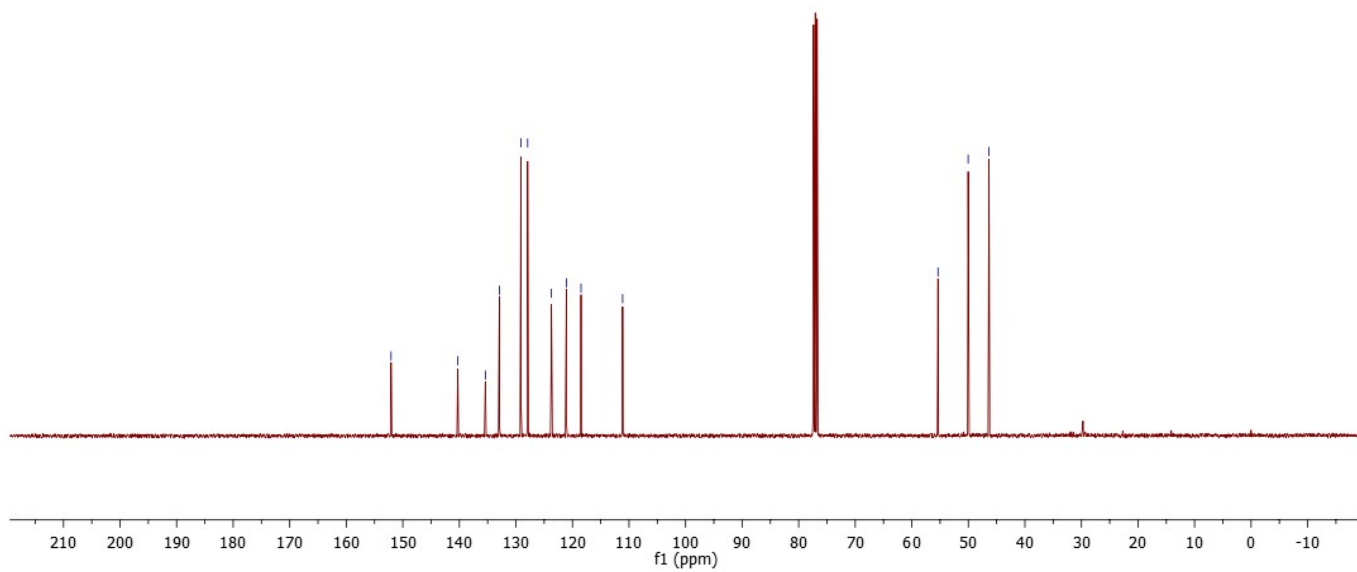

DRB-JS-27

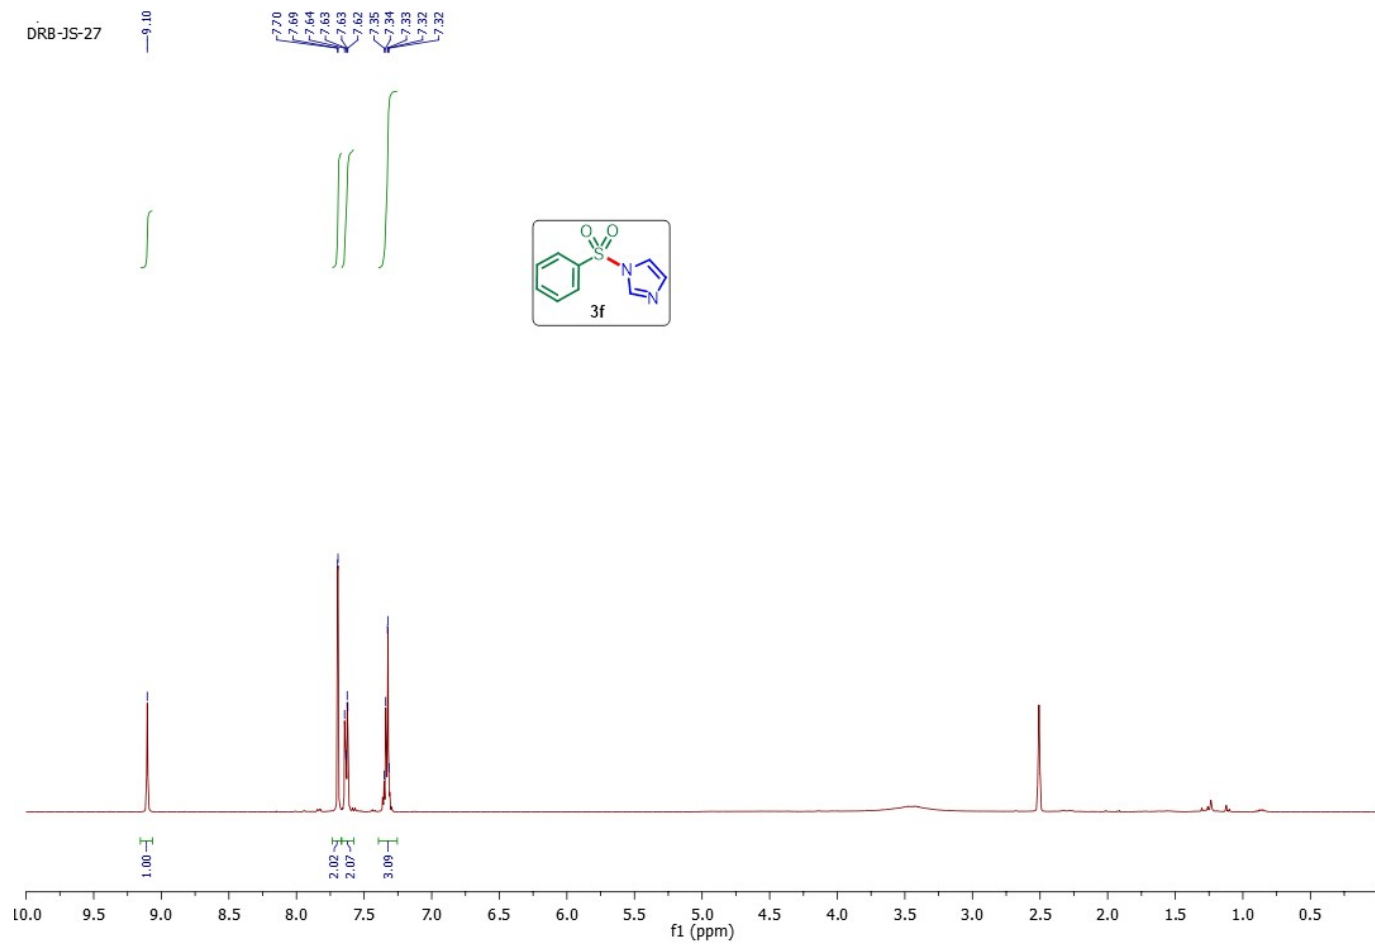

DRB-JS-27

148.66  
134.87  
129.02  
128.17  
125.94  
119.79

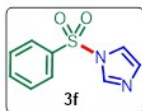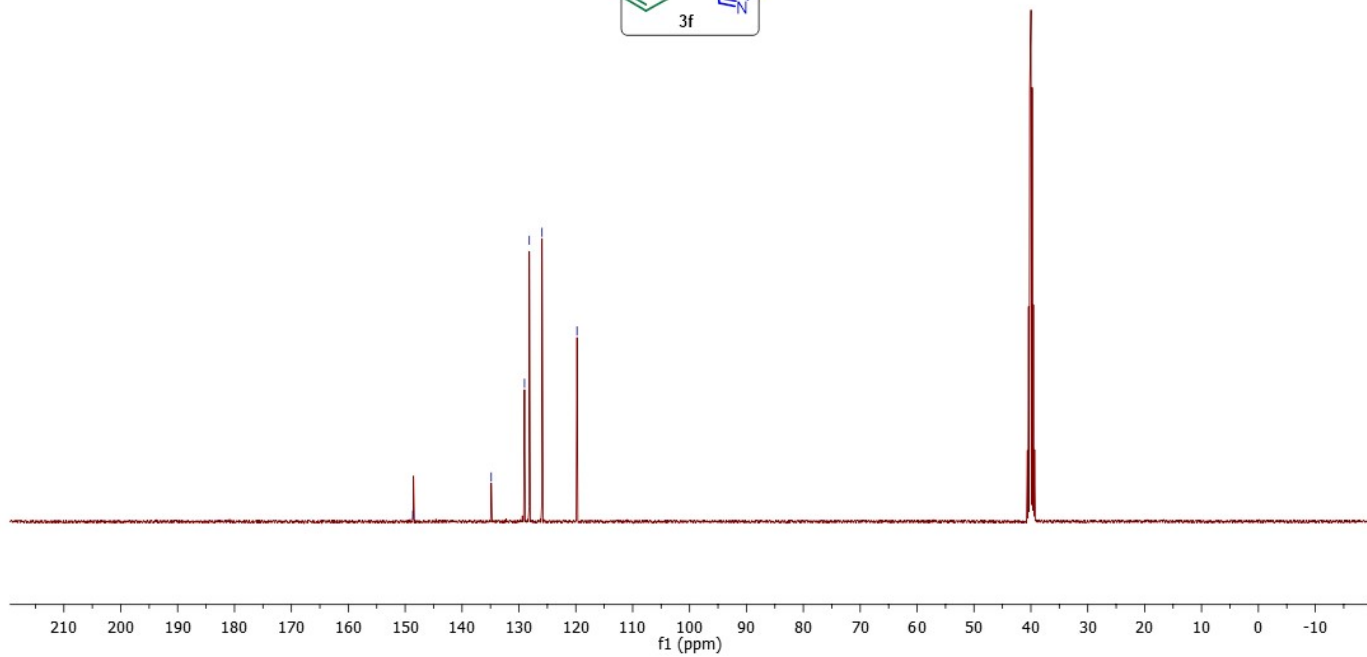

DRB-JS-31

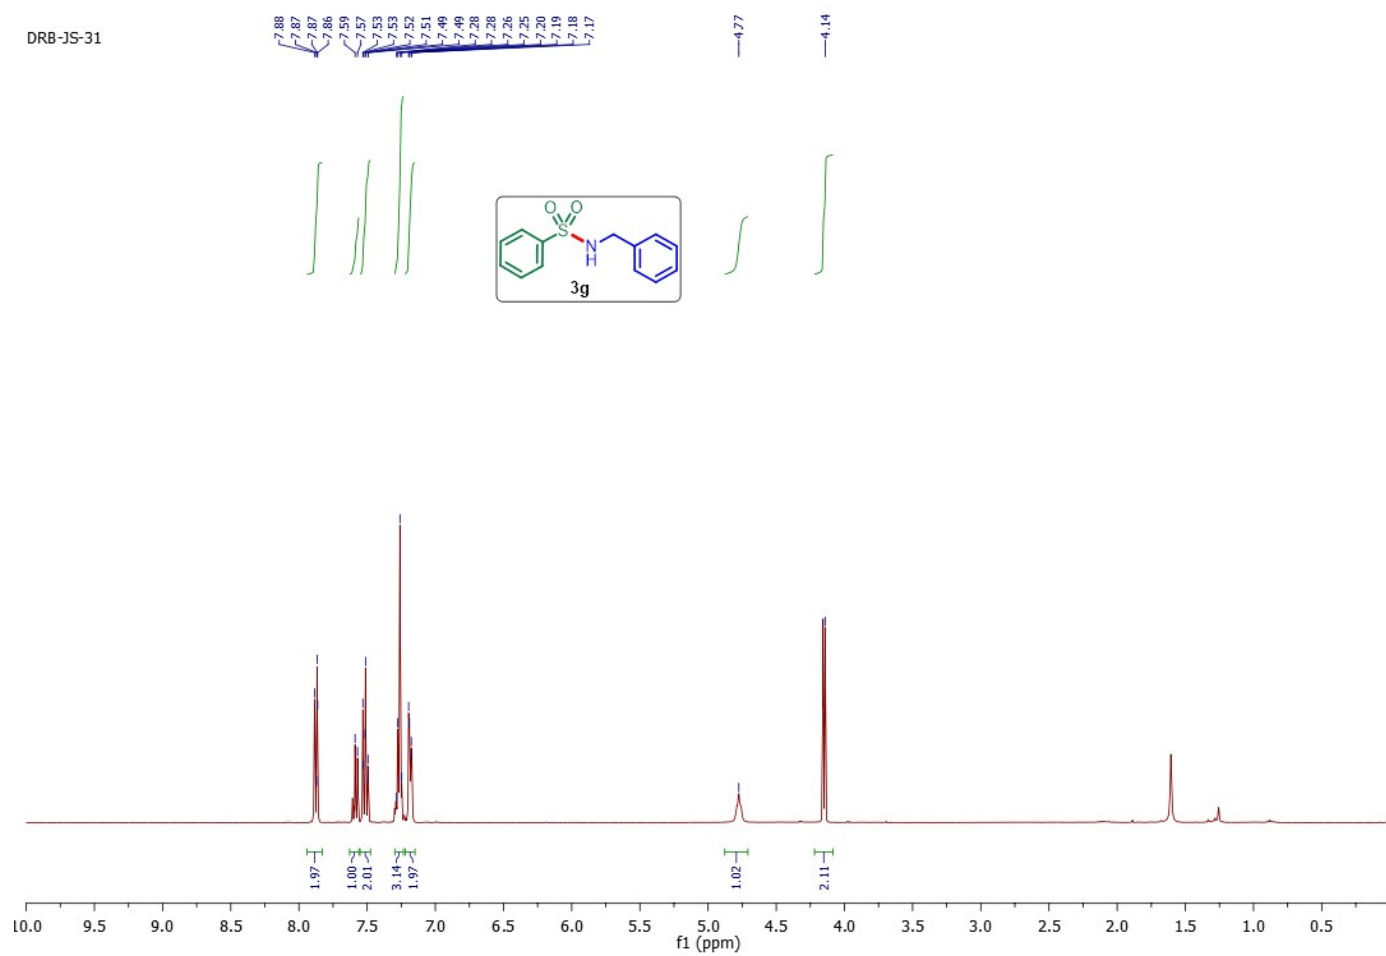

DRB-JS-31

139.94  
136.17  
132.73  
129.16  
128.74  
127.99  
127.87

47.32

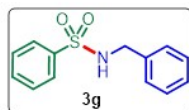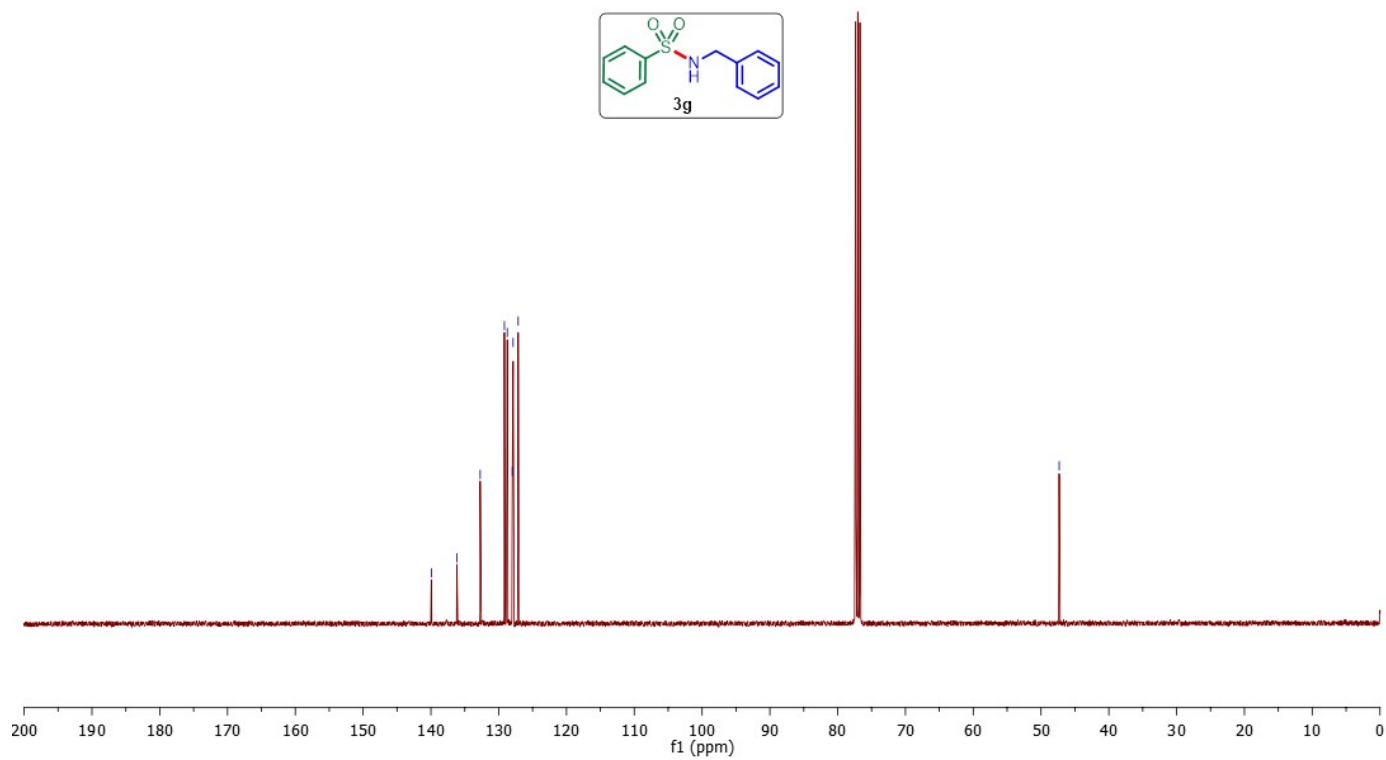

DRB-JS-61

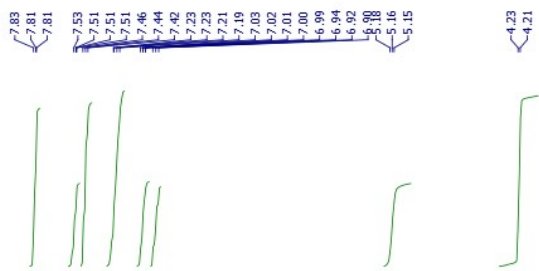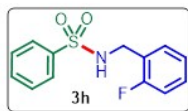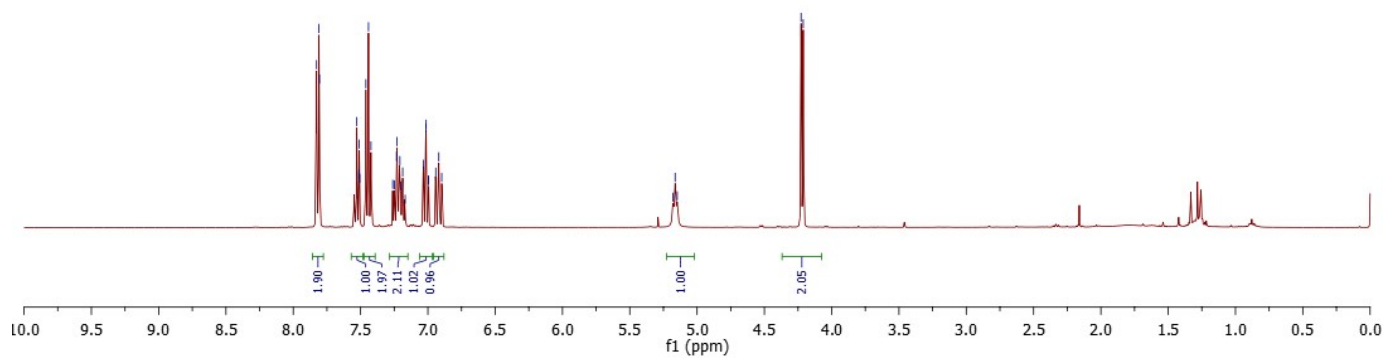



DRB-JS-61

161.92  
159.47

139.83  
132.65  
130.14  
130.10  
129.79  
129.05  
127.02  
124.32  
118.33  
115.22

41.34  
41.30

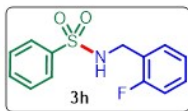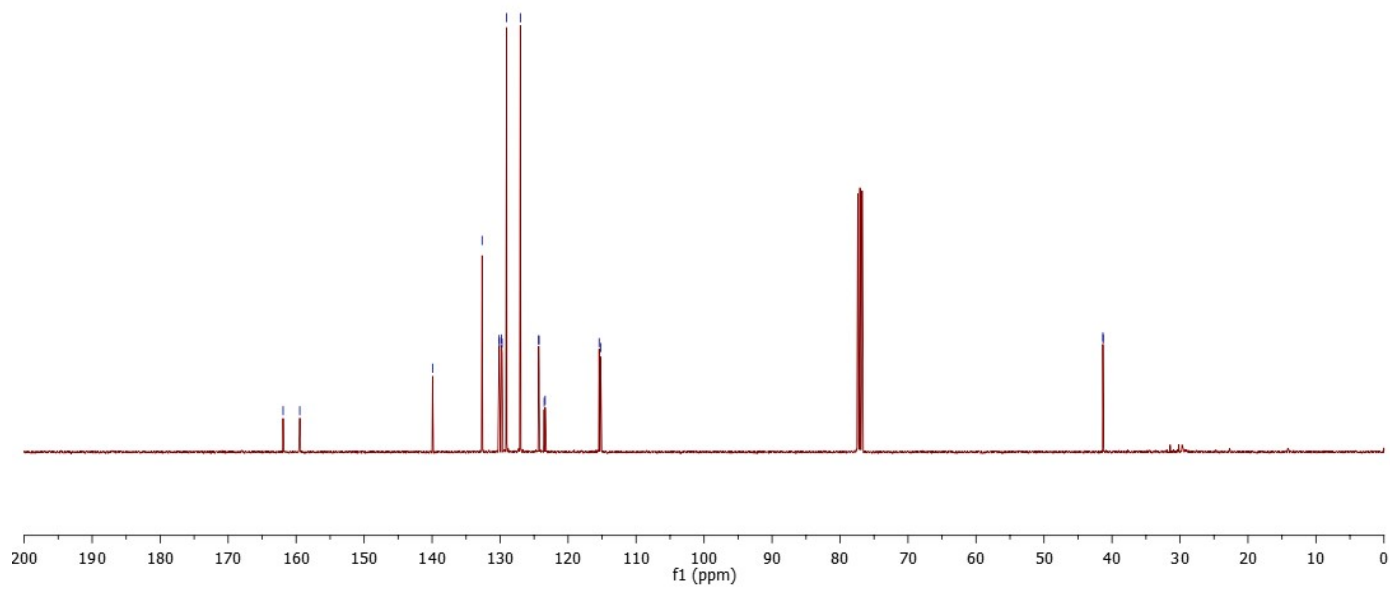

DRB-JS-68

7.85  
7.84  
7.84  
7.83  
7.61  
7.60  
7.59  
7.58  
7.57  
7.52  
7.51  
7.50  
7.49  
7.48  
7.24  
7.23  
7.22  
7.13  
7.11

5.01  
4.99  
4.98

4.12  
4.10

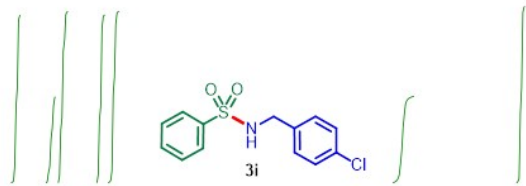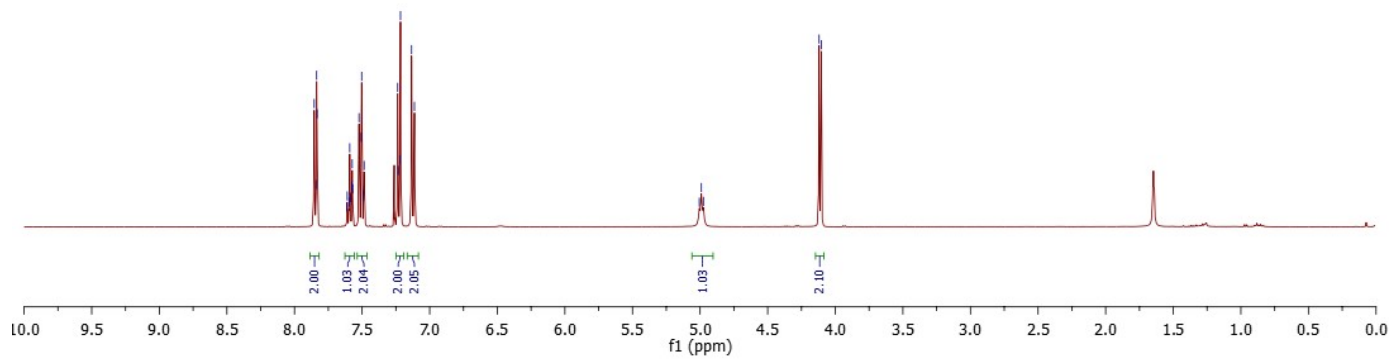

DRB-JS-68

139.85  
134.83  
133.75  
132.81  
129.22  
129.19  
128.81  
127.06

46.56

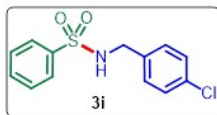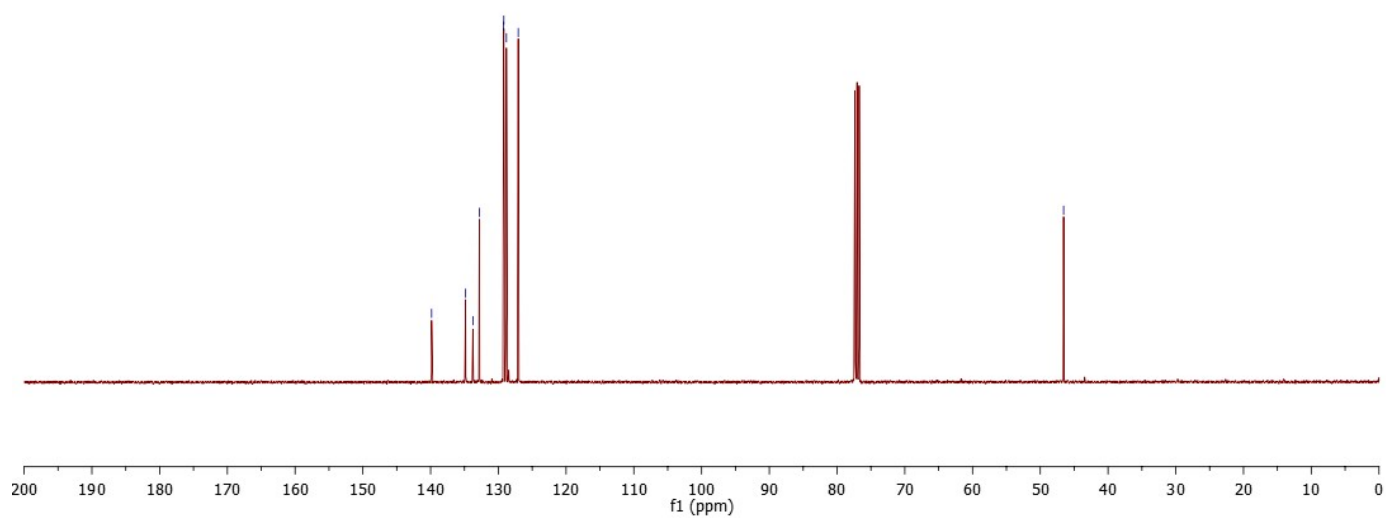

DRB-JS-70

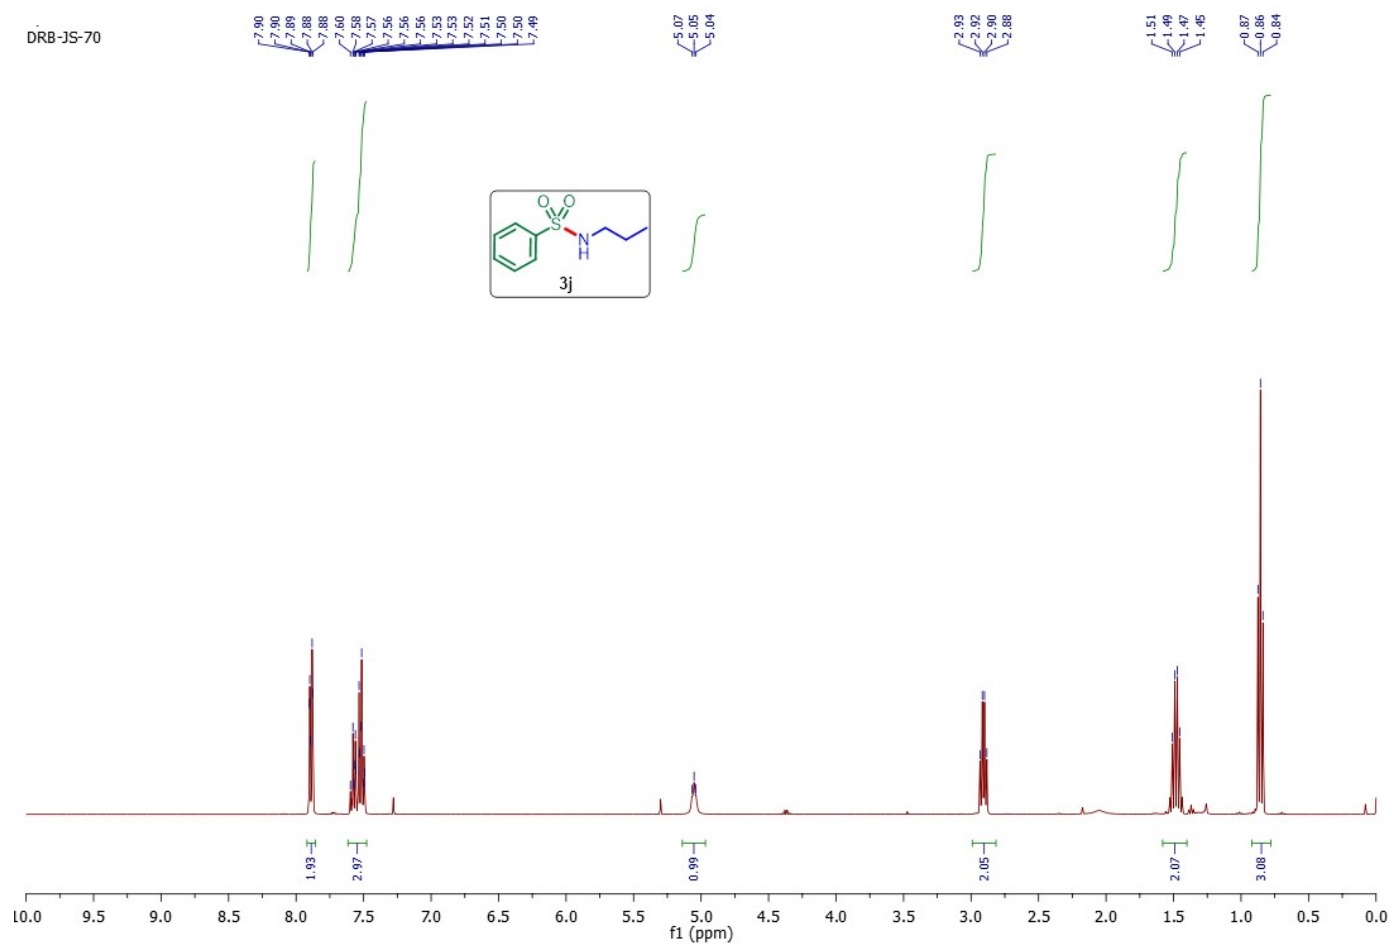

DRB-JS-70

140.03

132.56

129.09

127.02

44.98

22.89

11.09

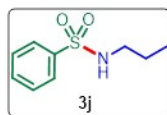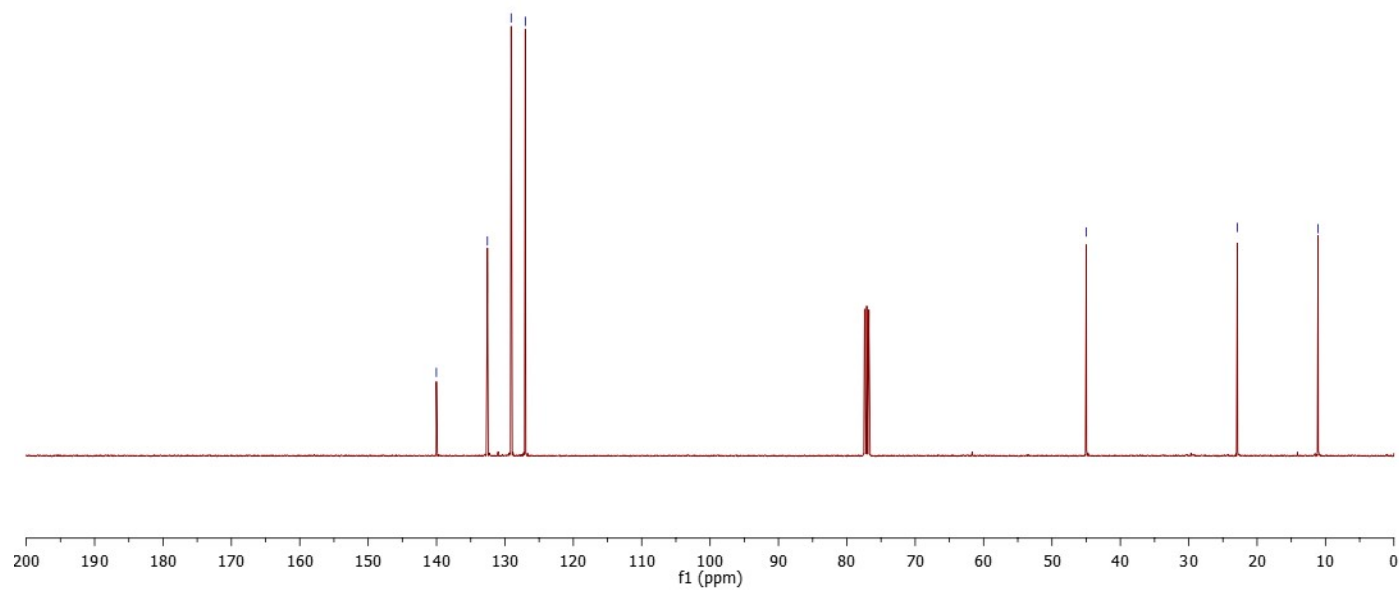

DRB-JS-64

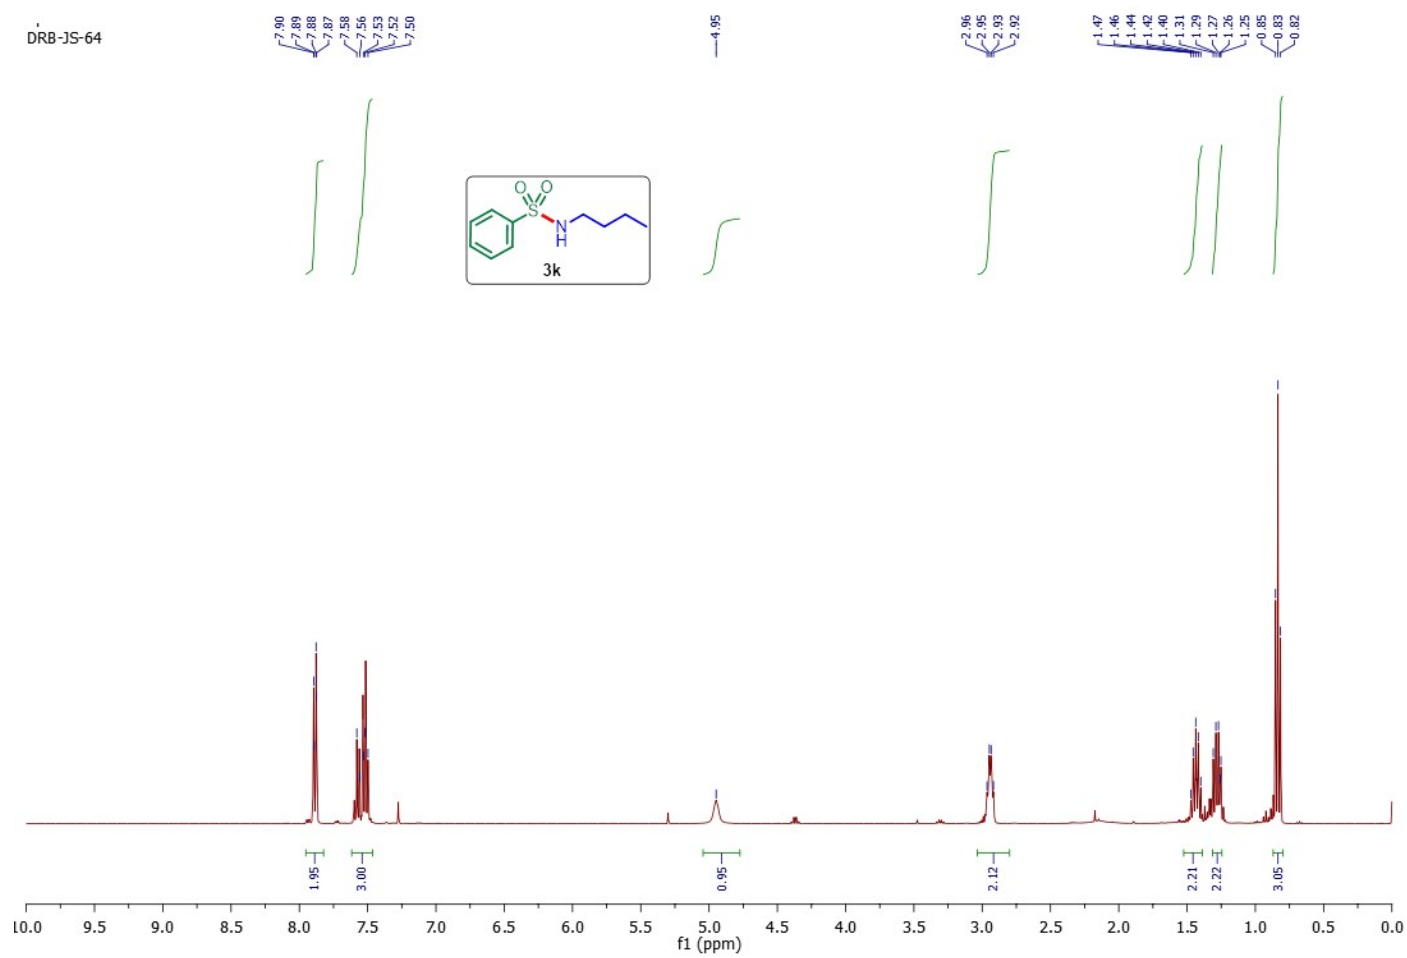

DRB-JS-64

140.00

132.55

129.08

127.13

42.94

31.72

19.57

13.64

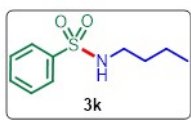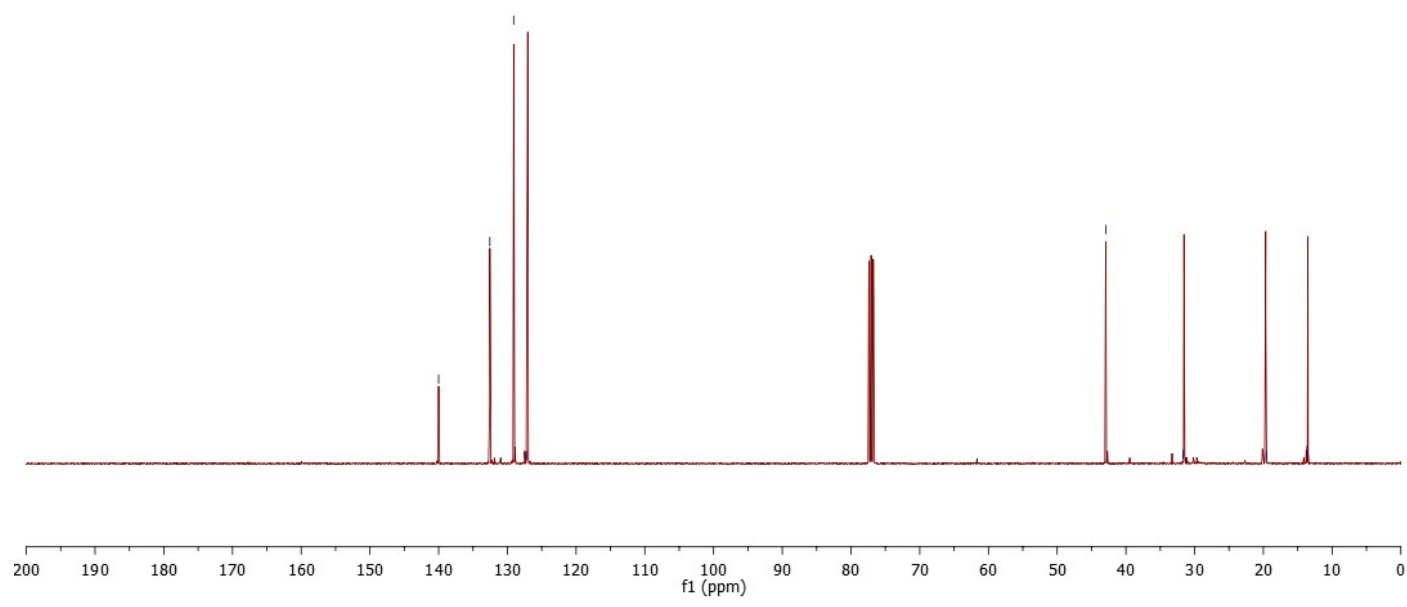

DRB-JS-83

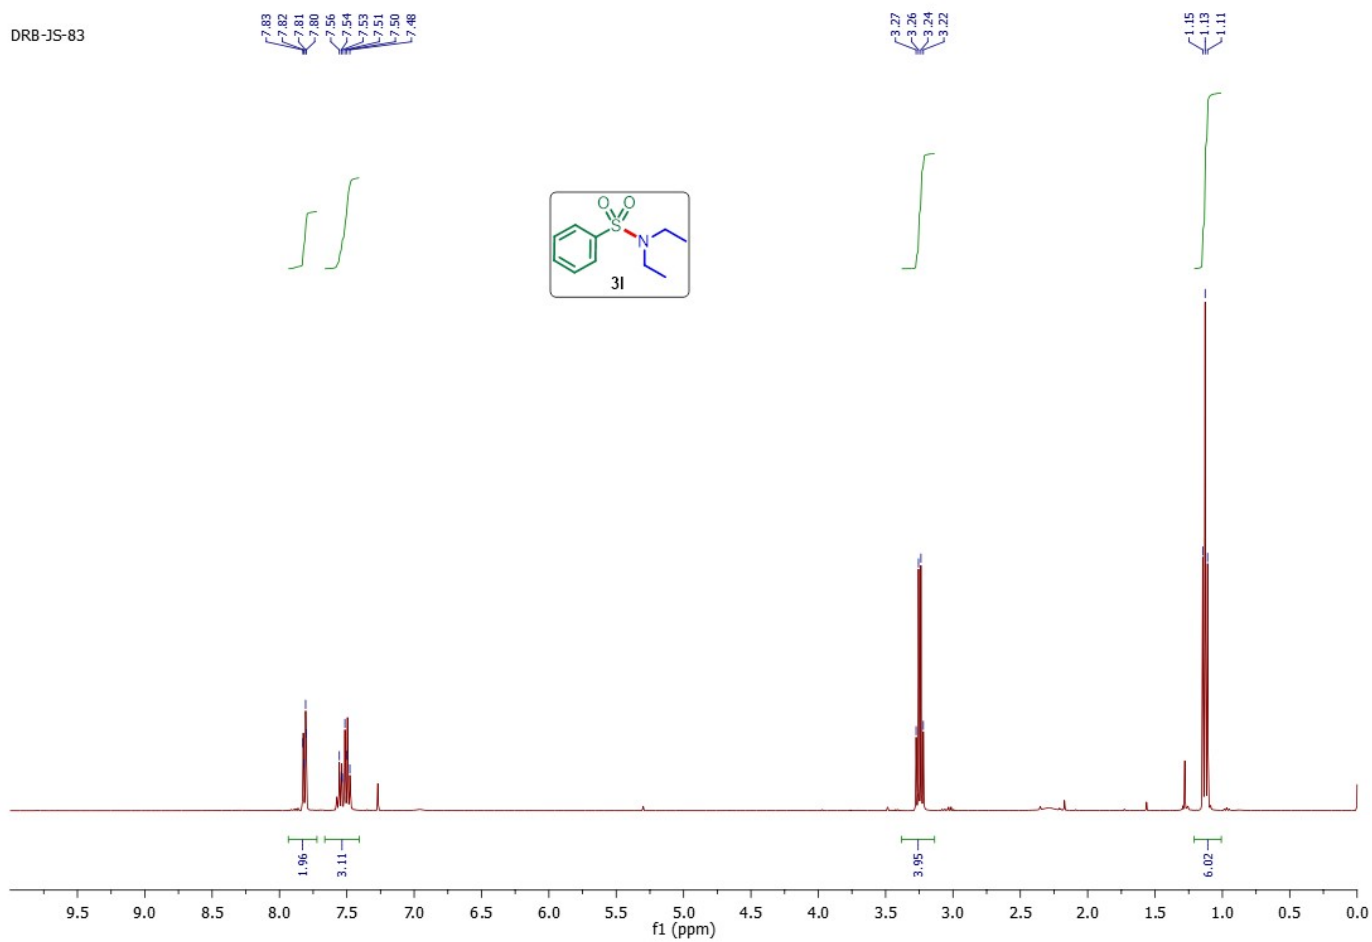



DRB-JS-83

140.42  
132.24  
129.00  
126.97

42.03

14.12

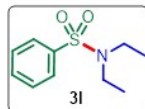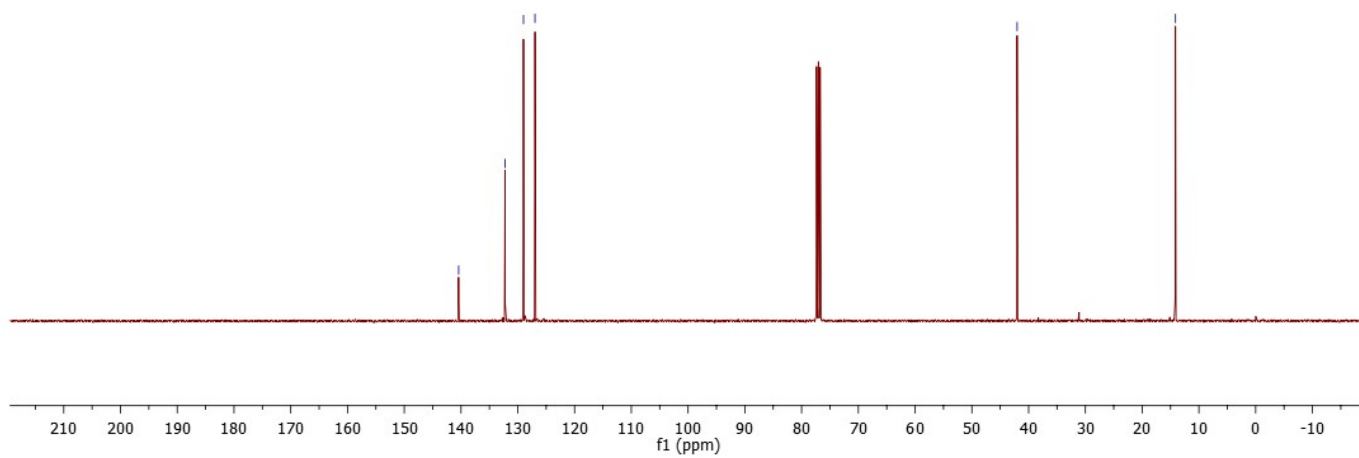

DRB-JS-38

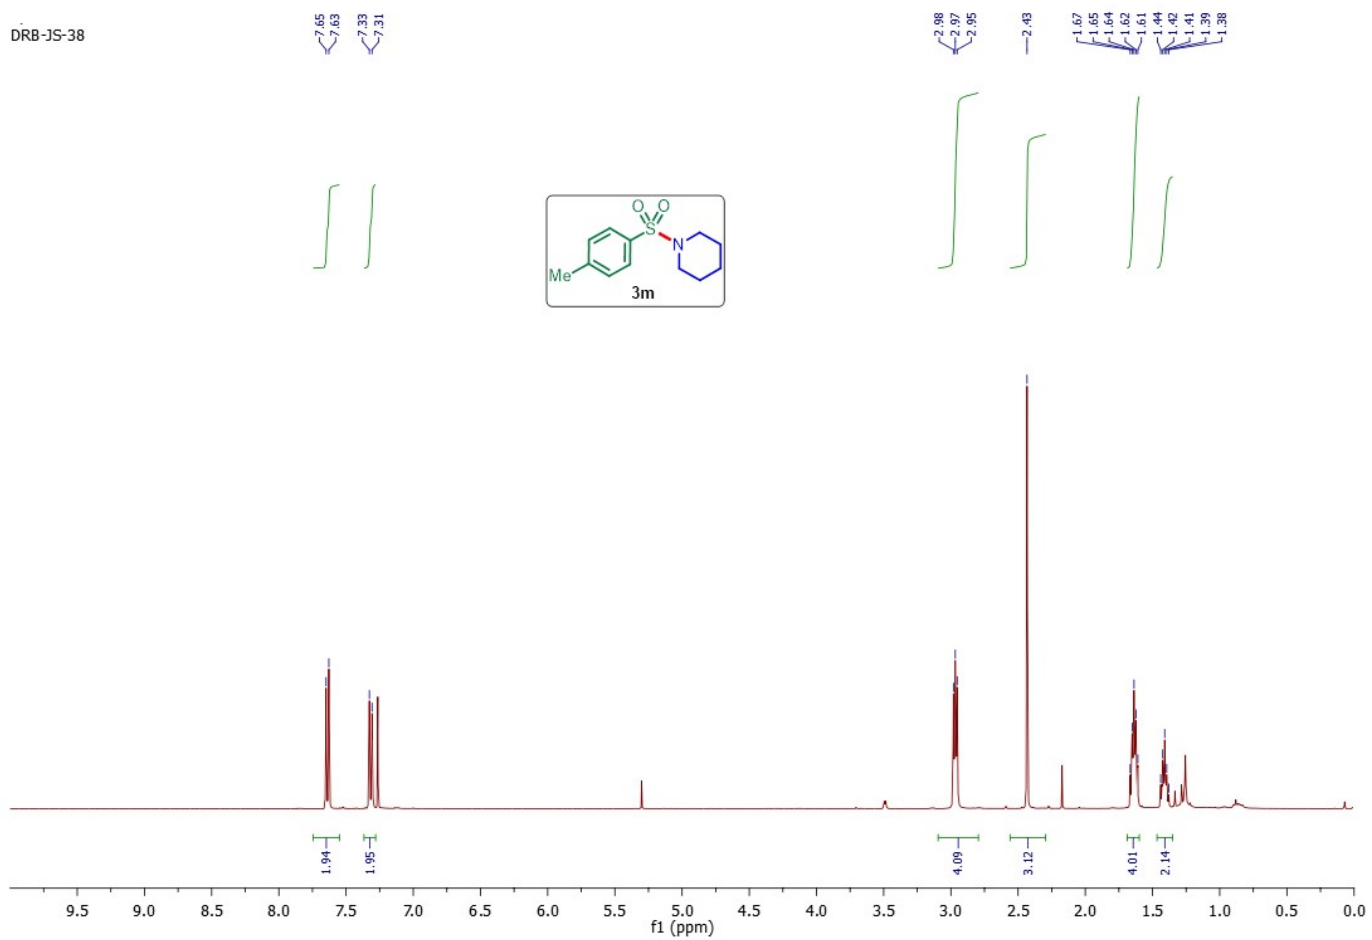

DRB-JS-38

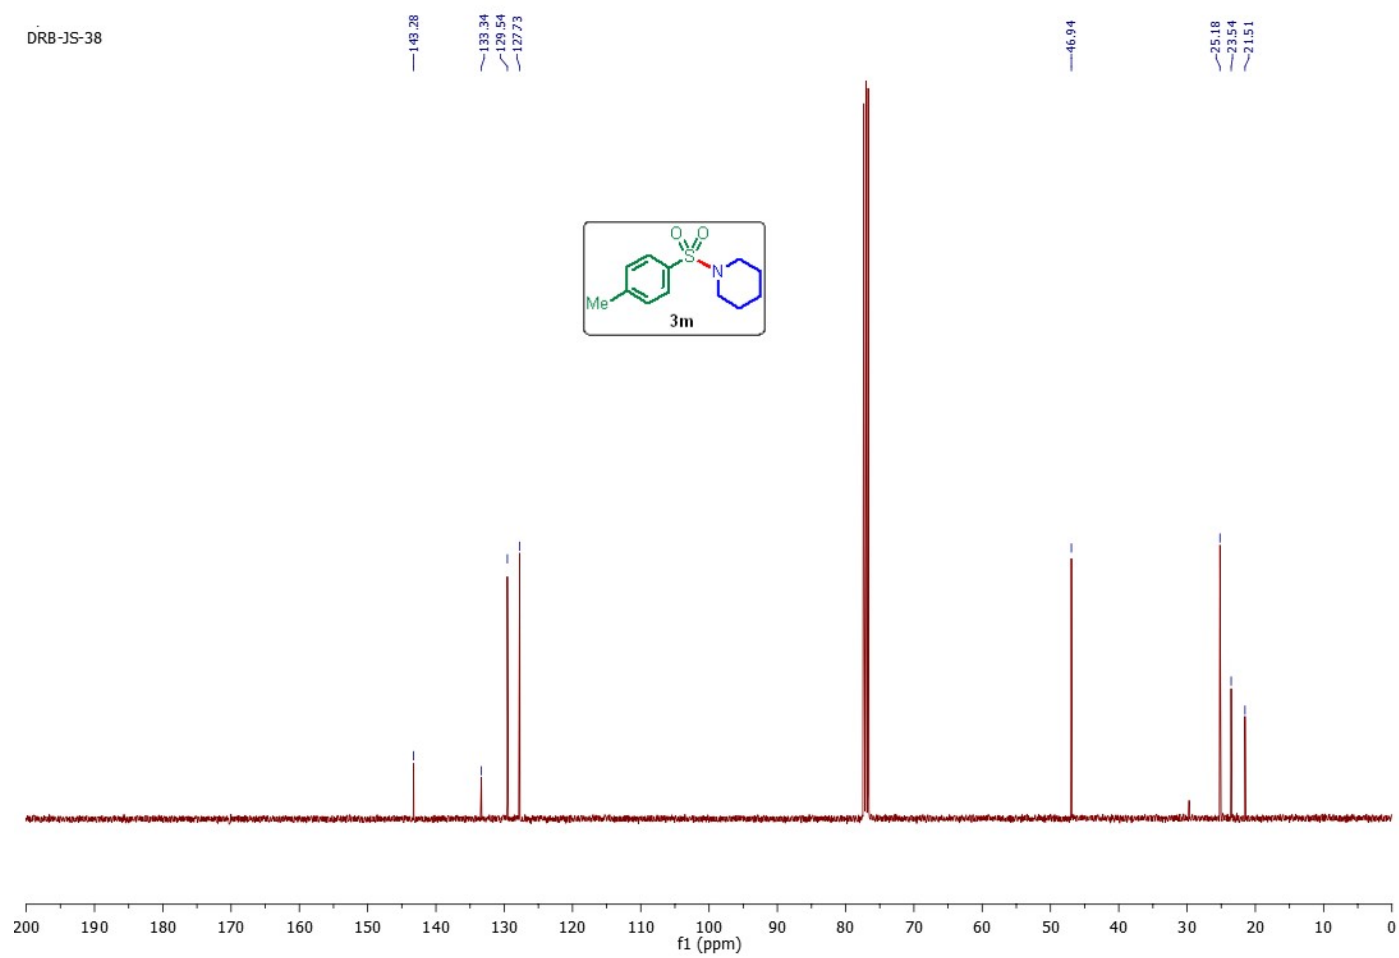

DRB-JS-12

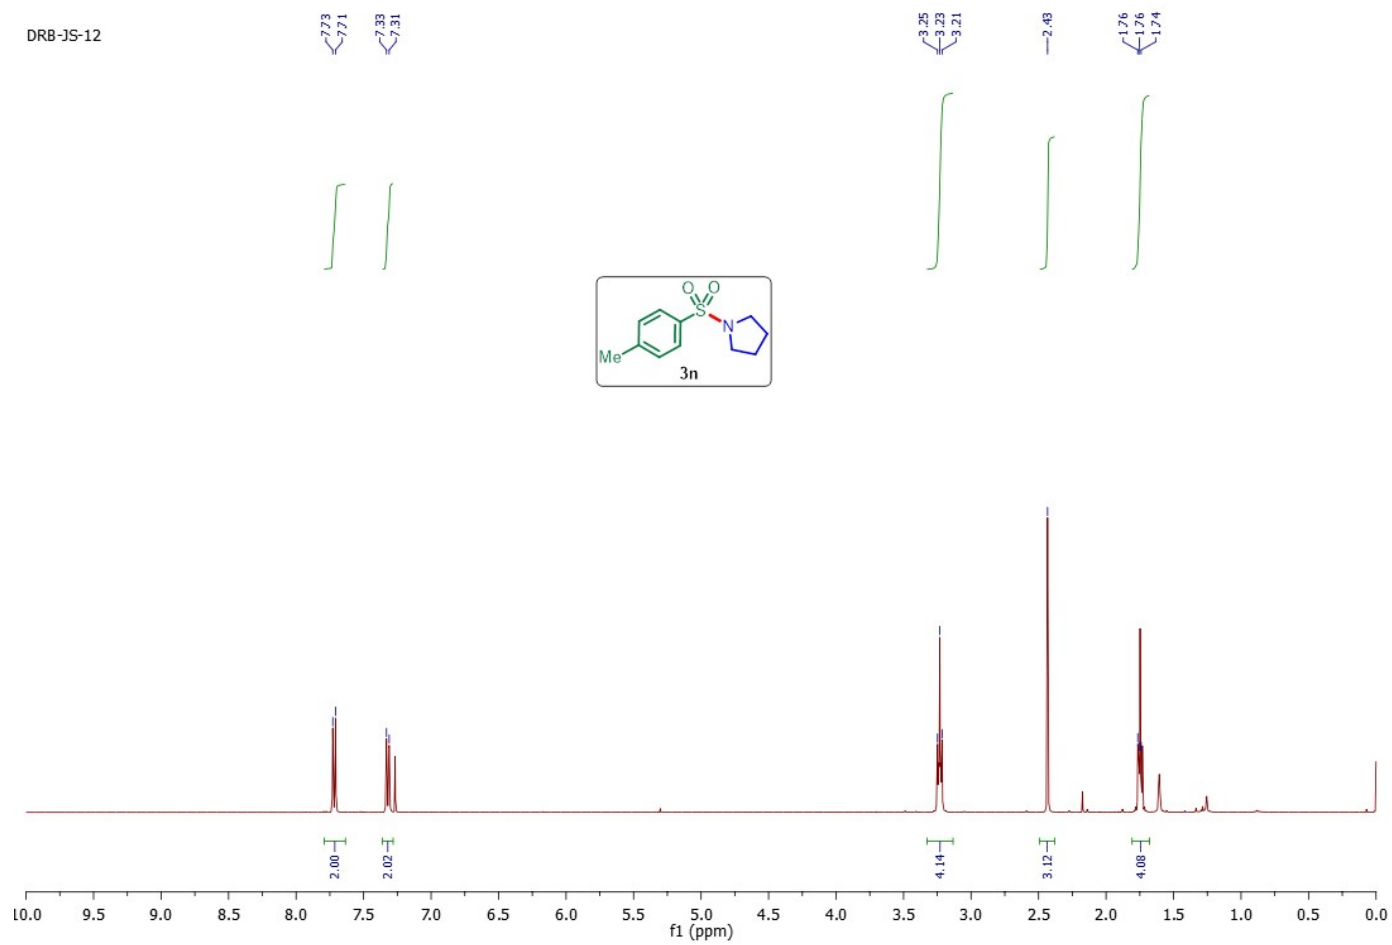

DRB-JS-12

143.37

133.91

129.71

127.58

48.21

25.02

21.52

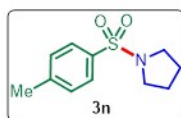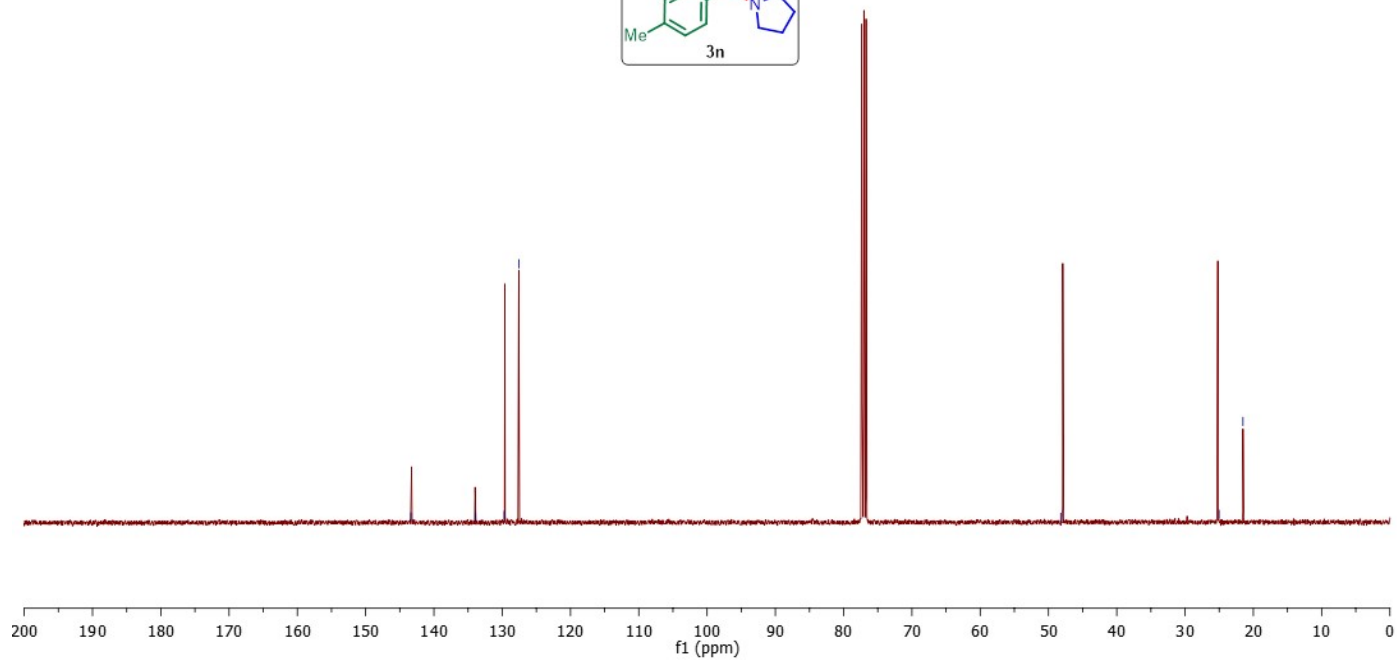

DRB-JS-17-II

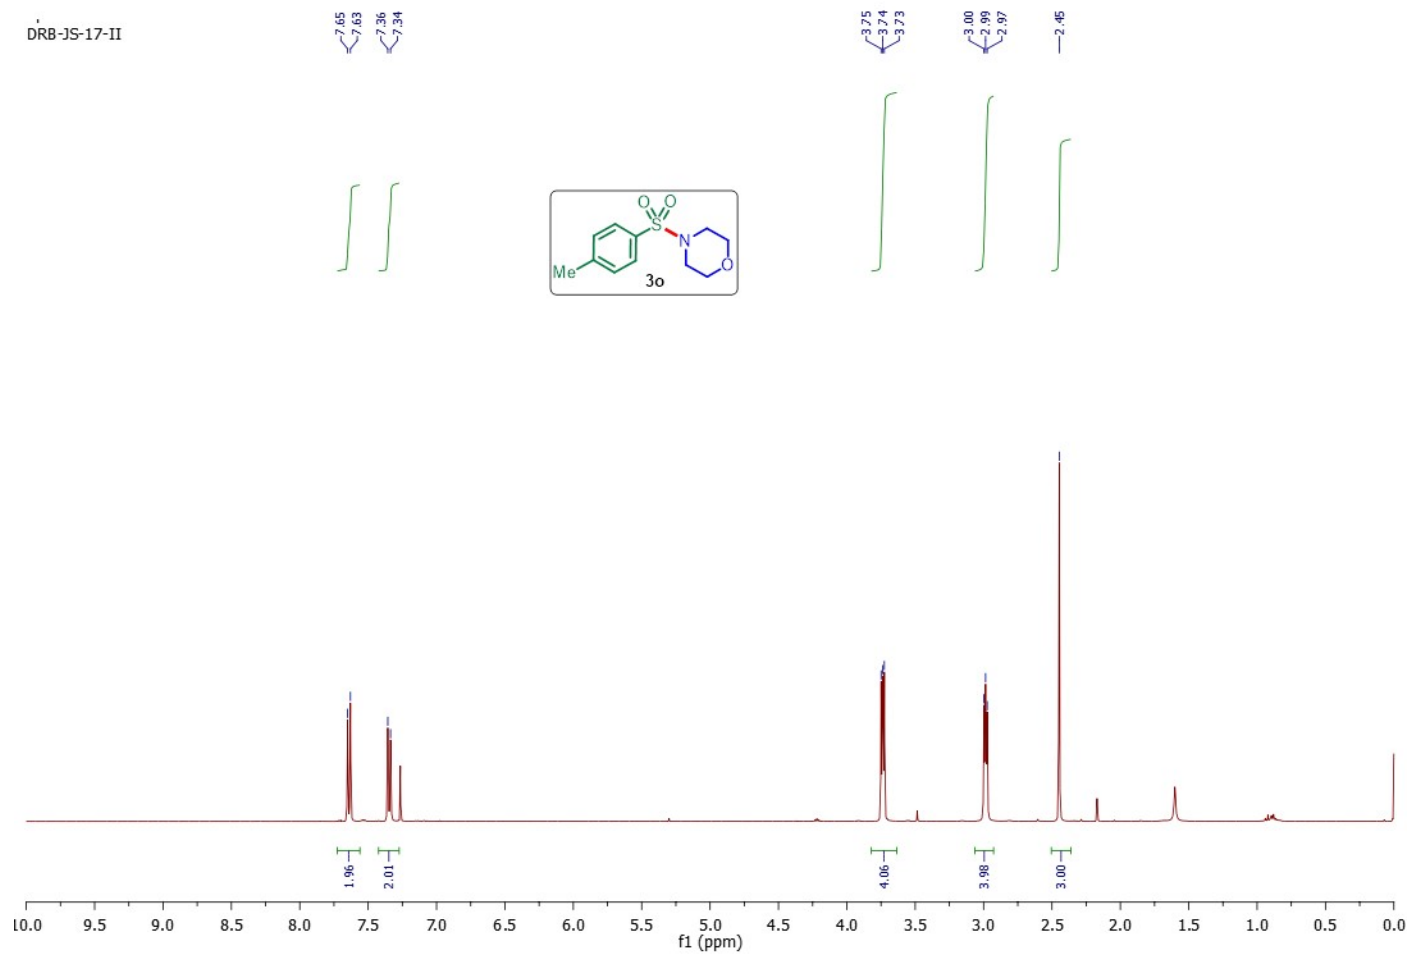

DRB-JS-38

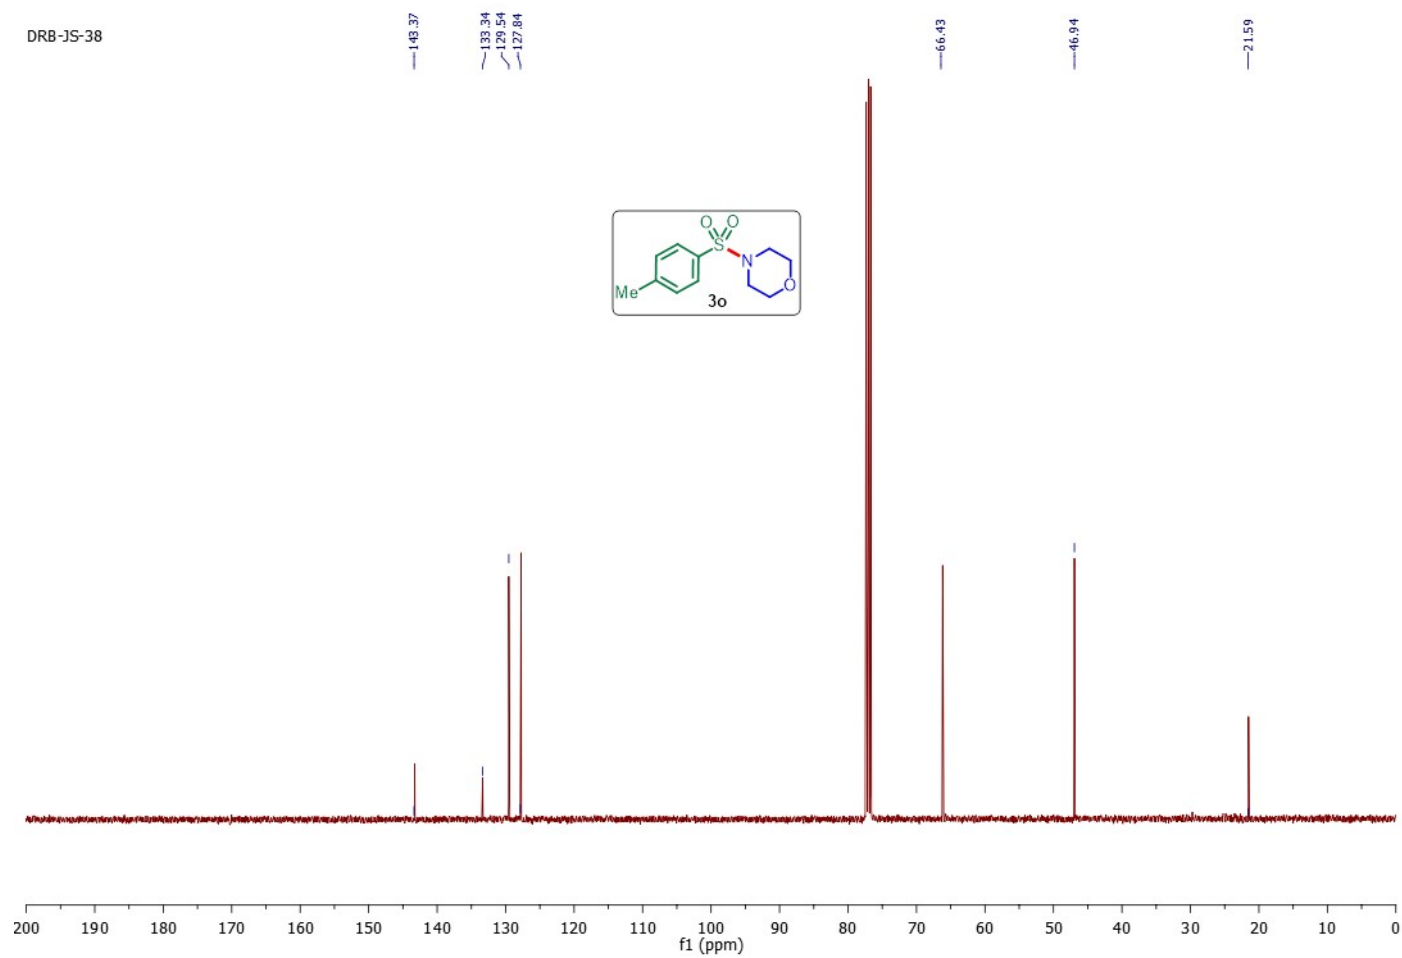

DRB-JS-39

7.73  
7.71  
7.54  
7.53  
7.52  
7.51  
7.19  
7.18  
7.17

3.75  
3.72

2.97  
2.94  
2.93  
2.92  
2.53  
2.52  
2.50  
2.47  
2.24  
2.19  
2.16  
1.95  
1.93  
1.90  
1.89

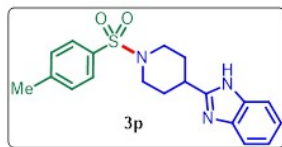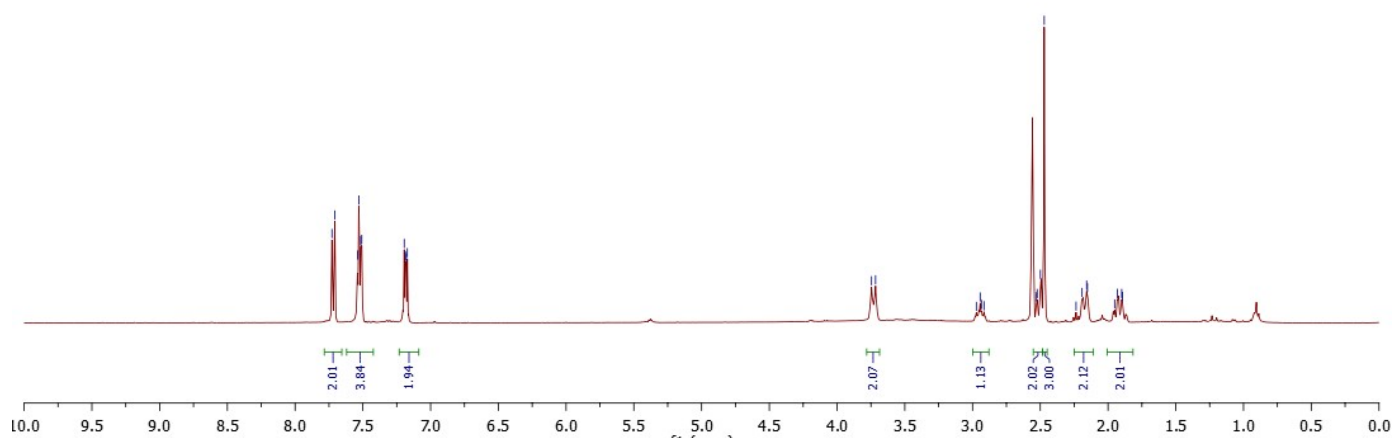



Apr21-2024  
DRB-JS-39

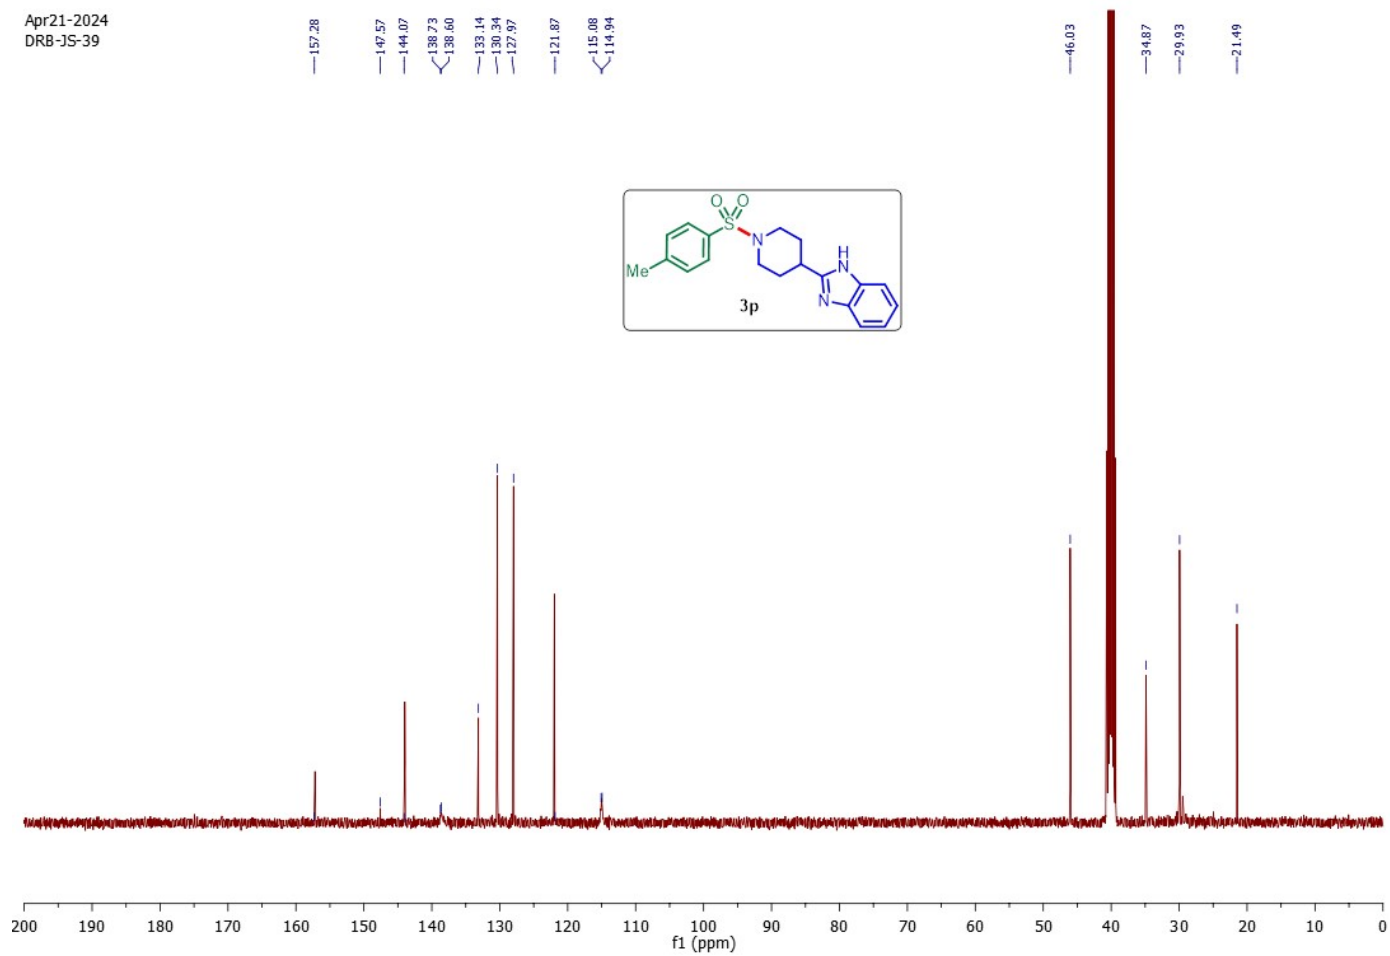

DRB-JS-43

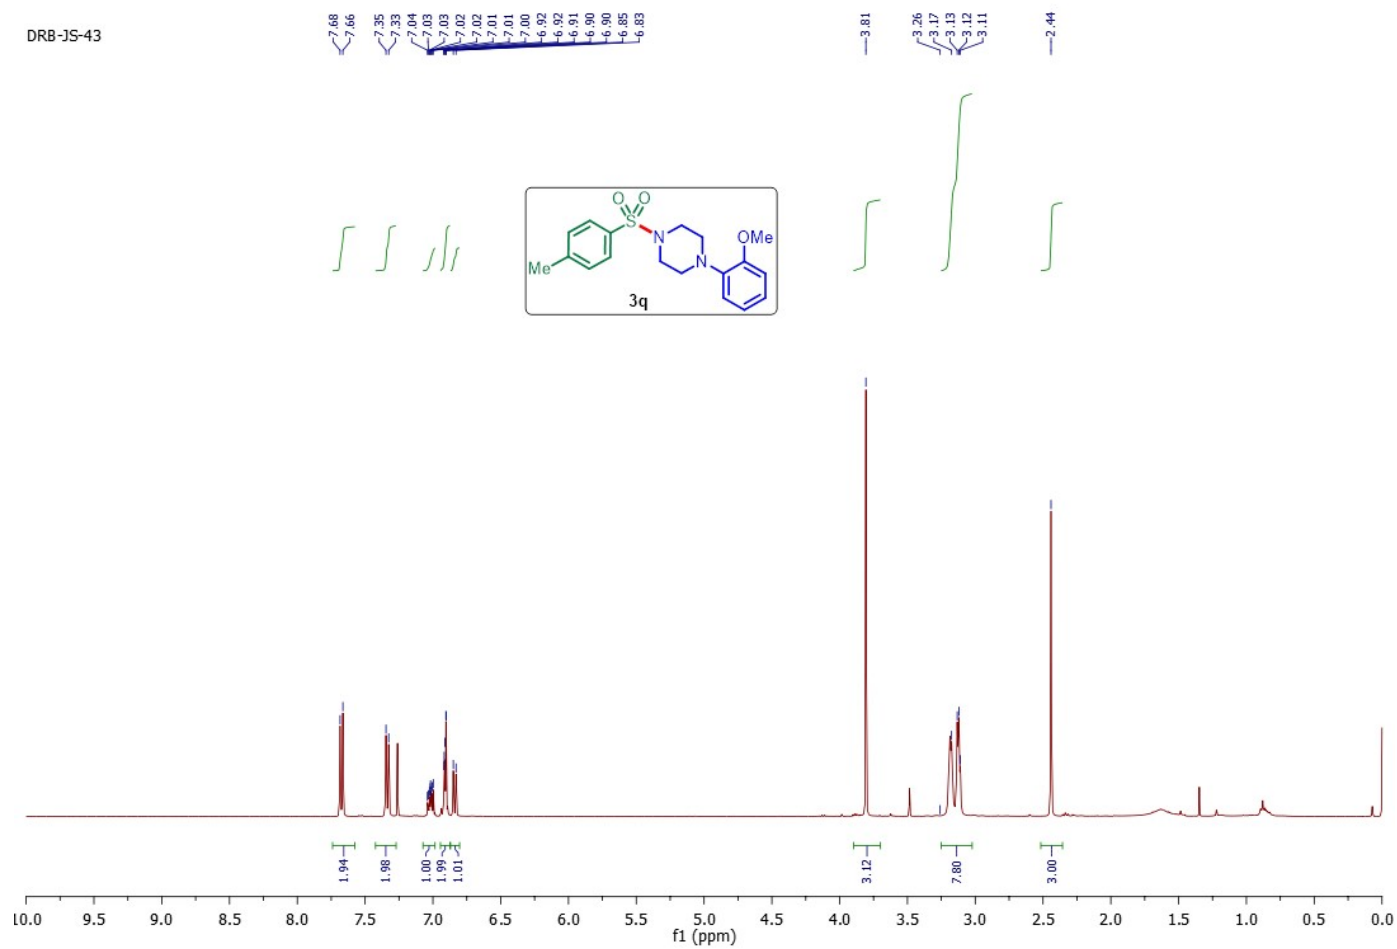

DRB-JS-43

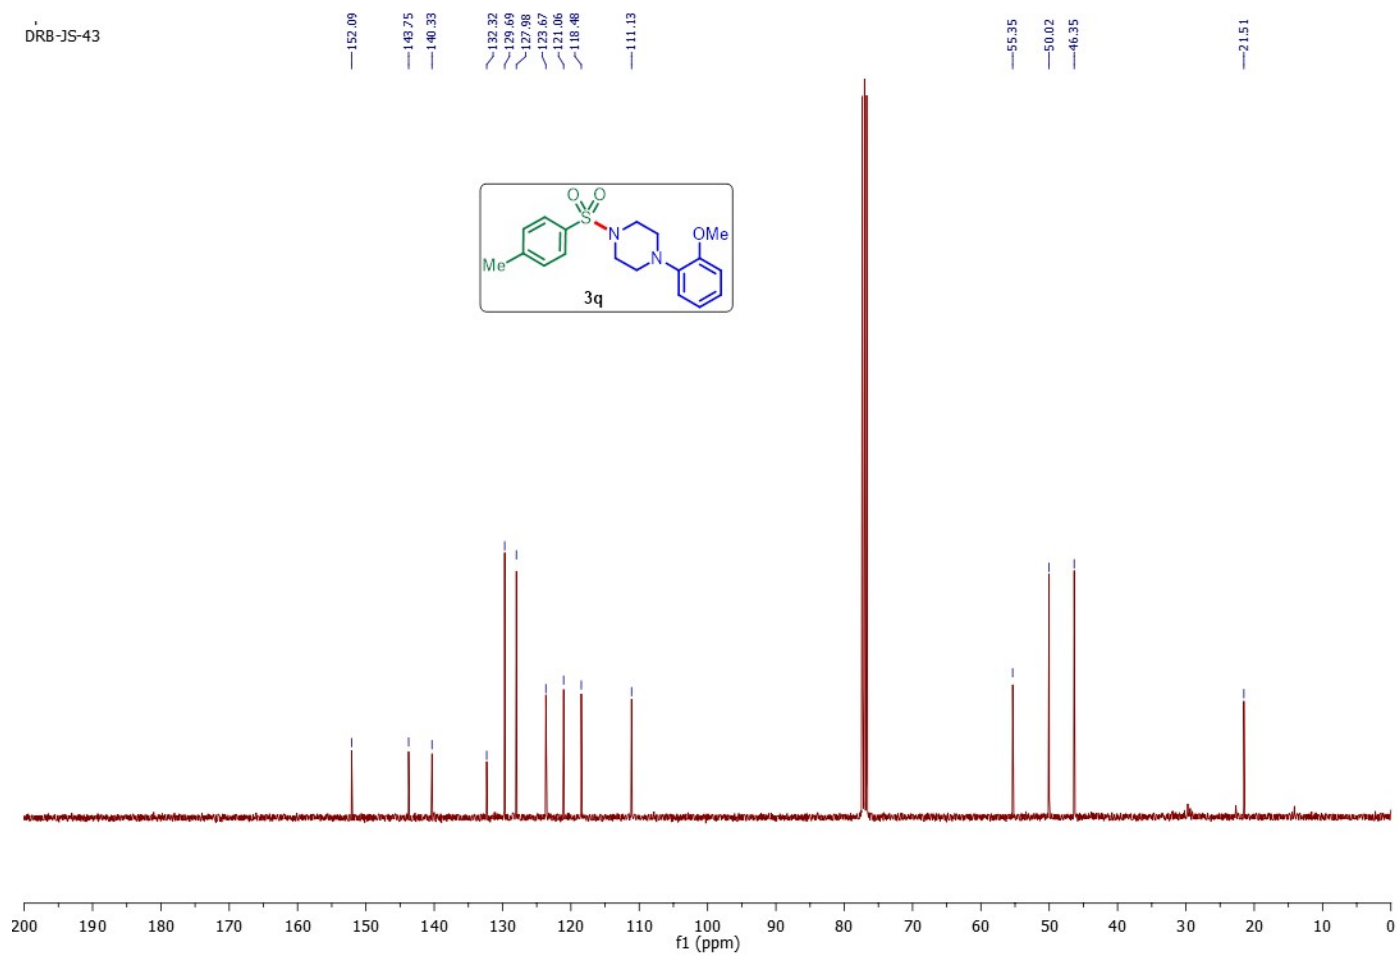

DRB-JS-16

9.10

7.69

7.52

7.50

7.14

7.12

2.29

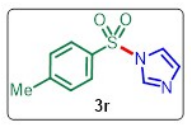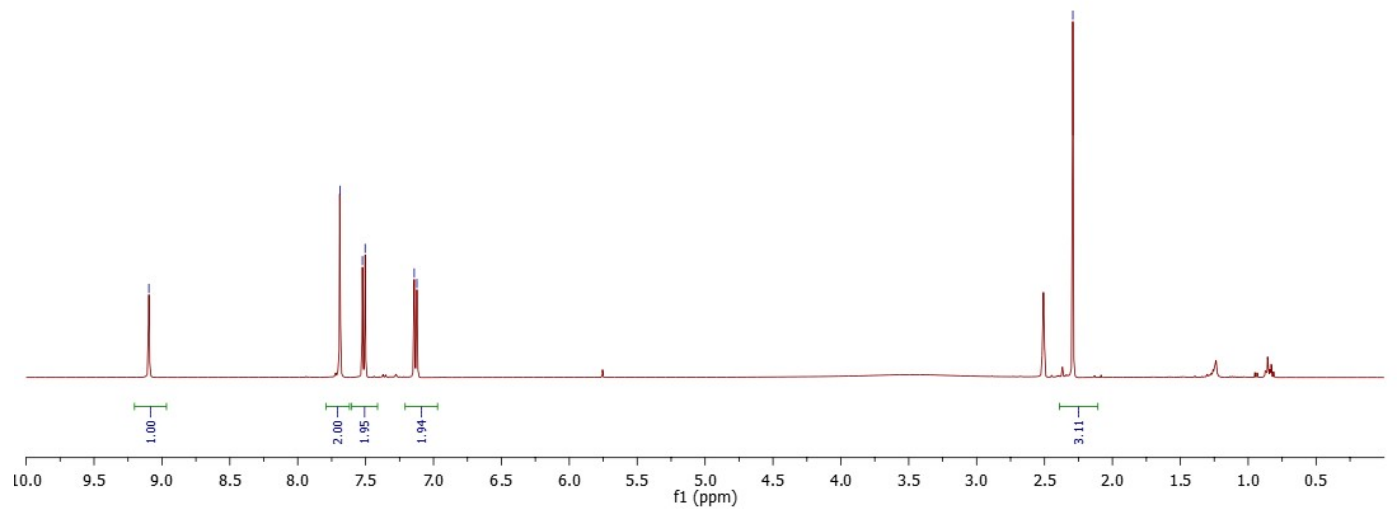

DRB-JS-16

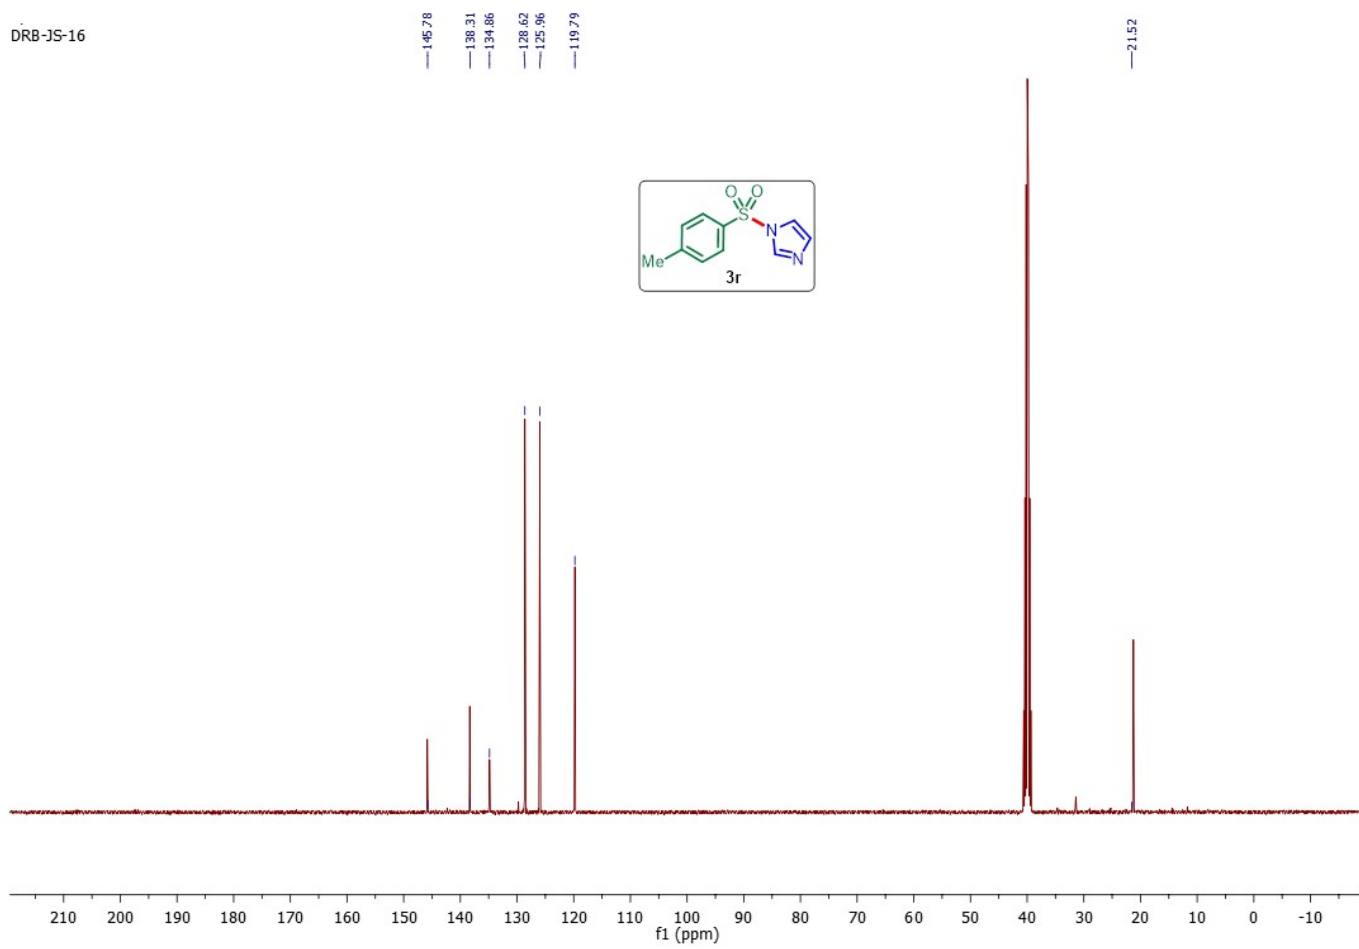

DRB-JS-13

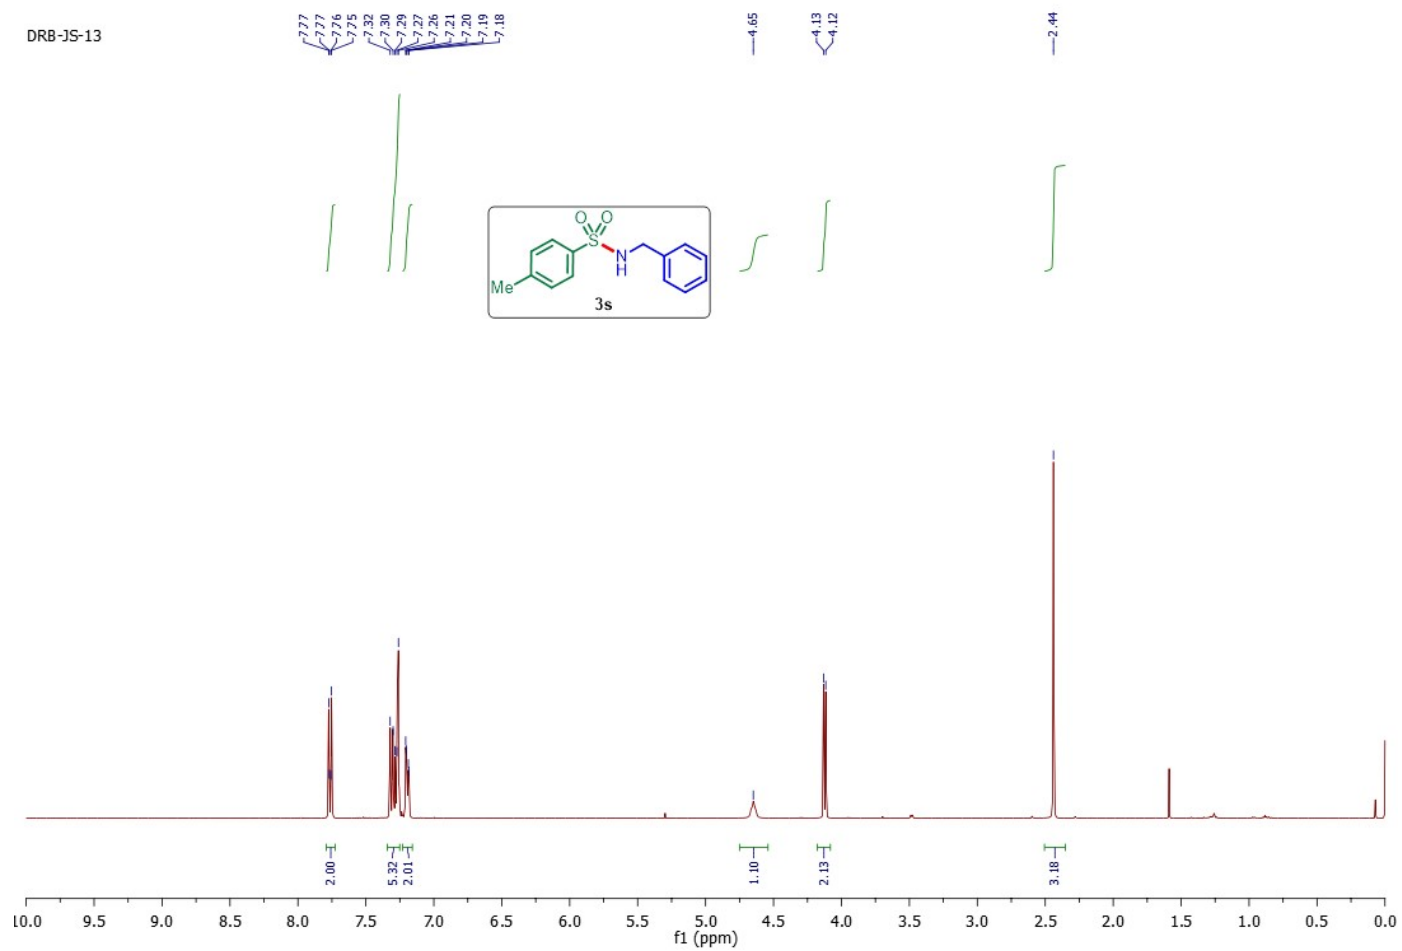

DRB-JS-13

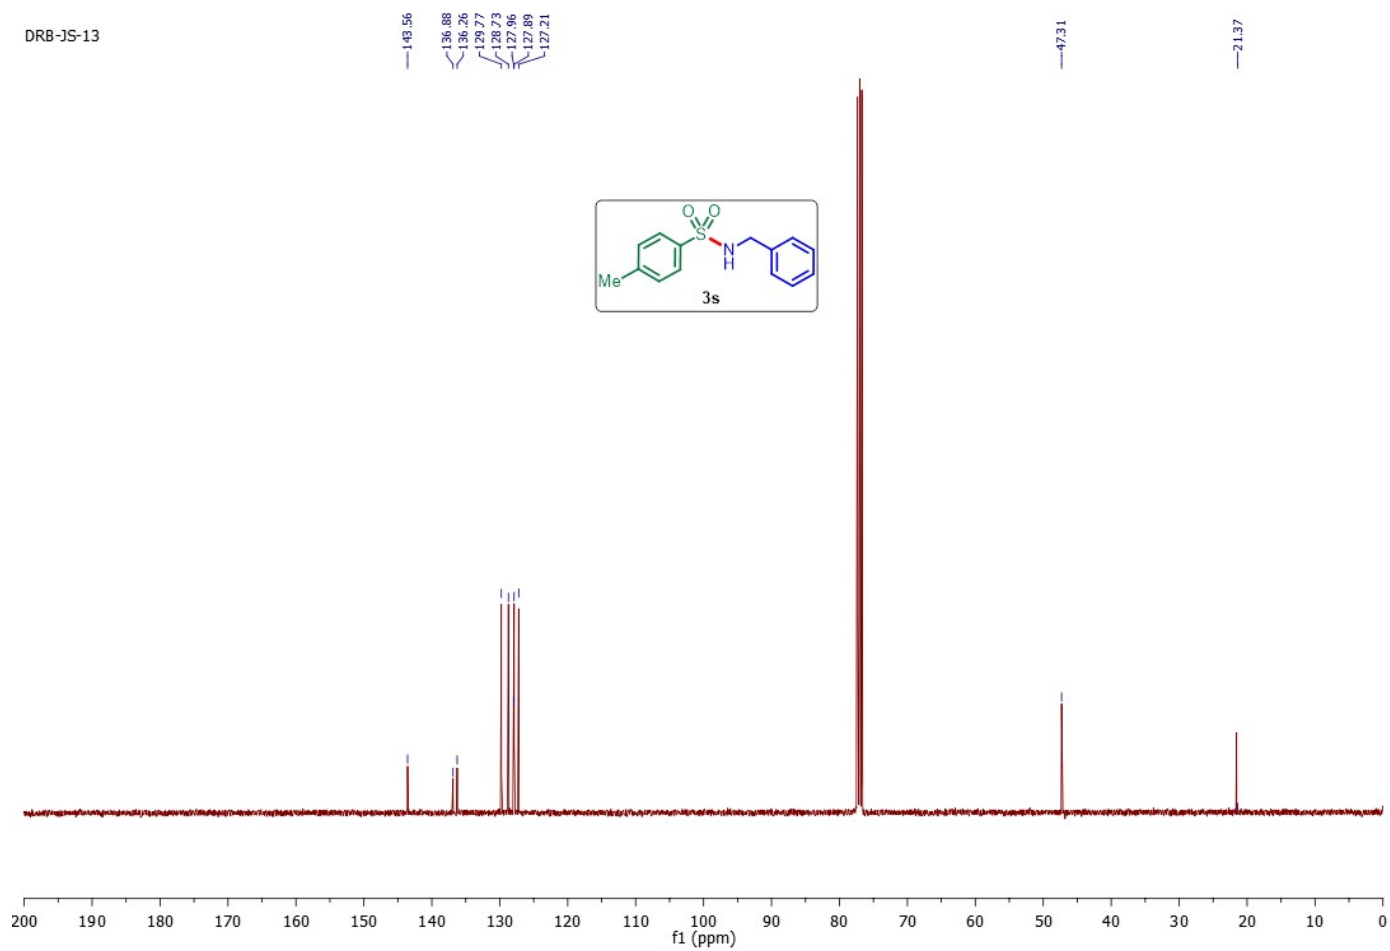

DRB-JS-79

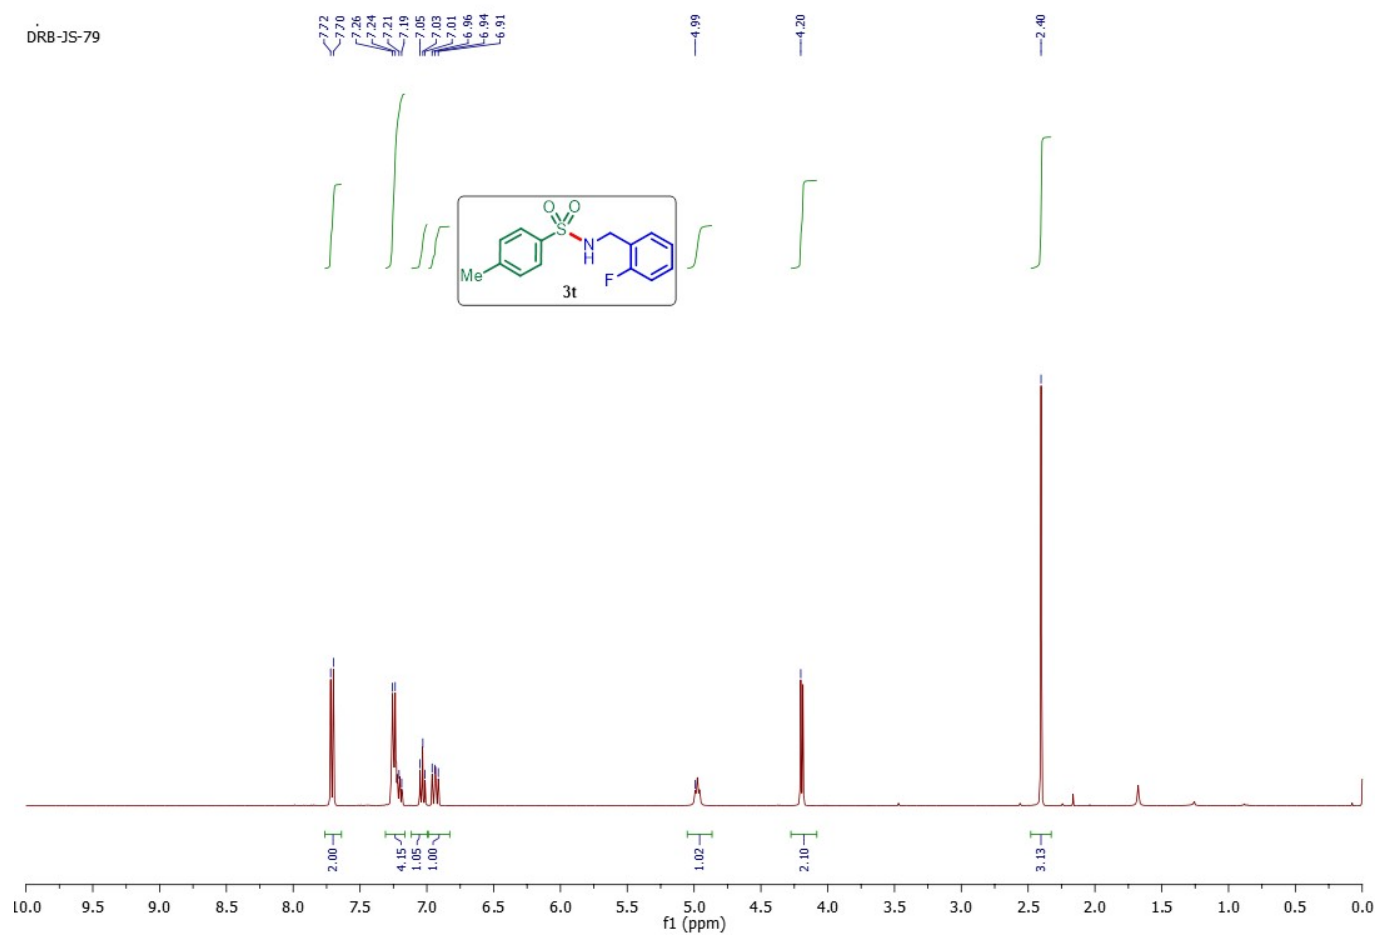



DRB-JS-79

161.93  
159.46

143.48

136.89

130.15  
130.11  
129.71  
129.66  
129.63  
127.11  
115.42  
115.21

41.31  
41.27

21.51

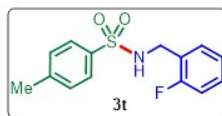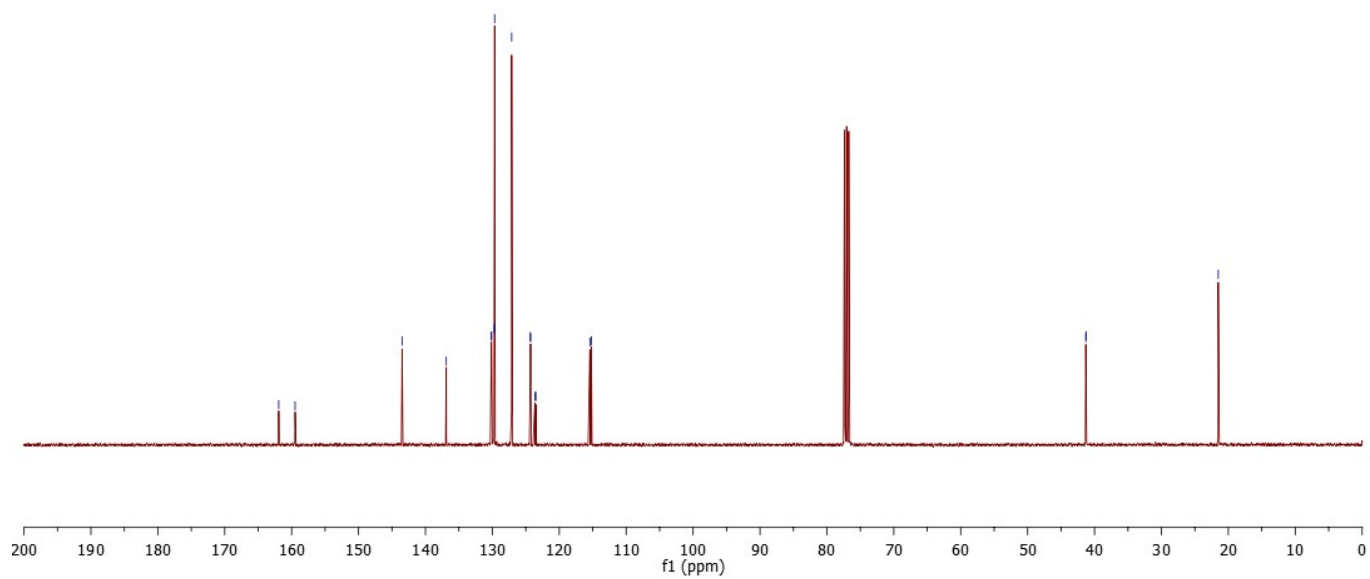

DRB-JS-73

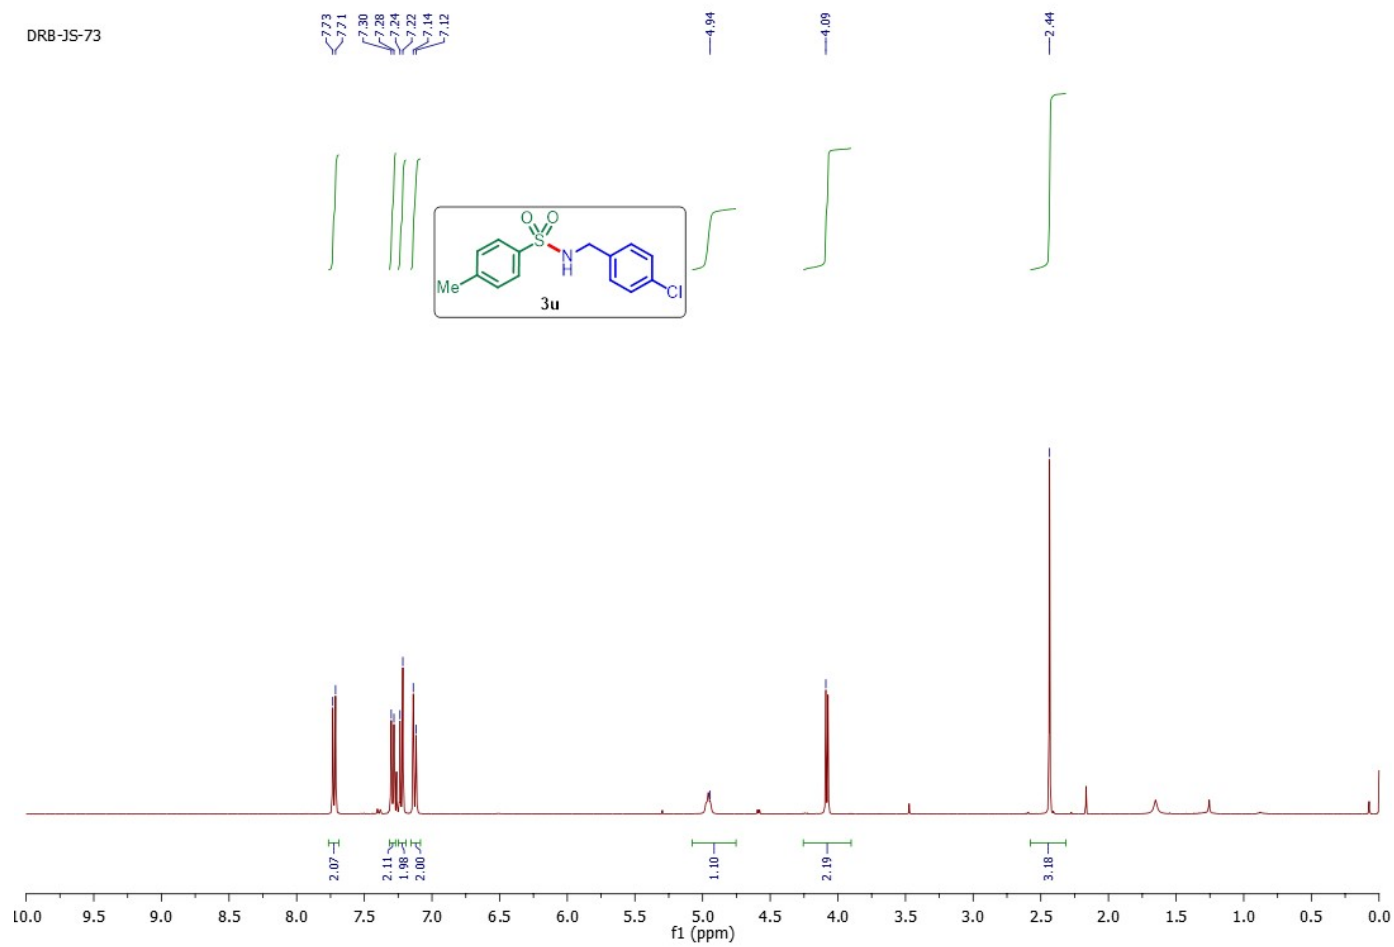

Apr25-2024  
DRB-JS-73

148.69  
136.82  
134.91  
133.73  
129.78  
129.23  
128.79  
127.15

46.56

21.55

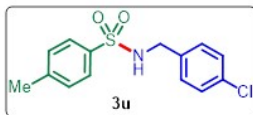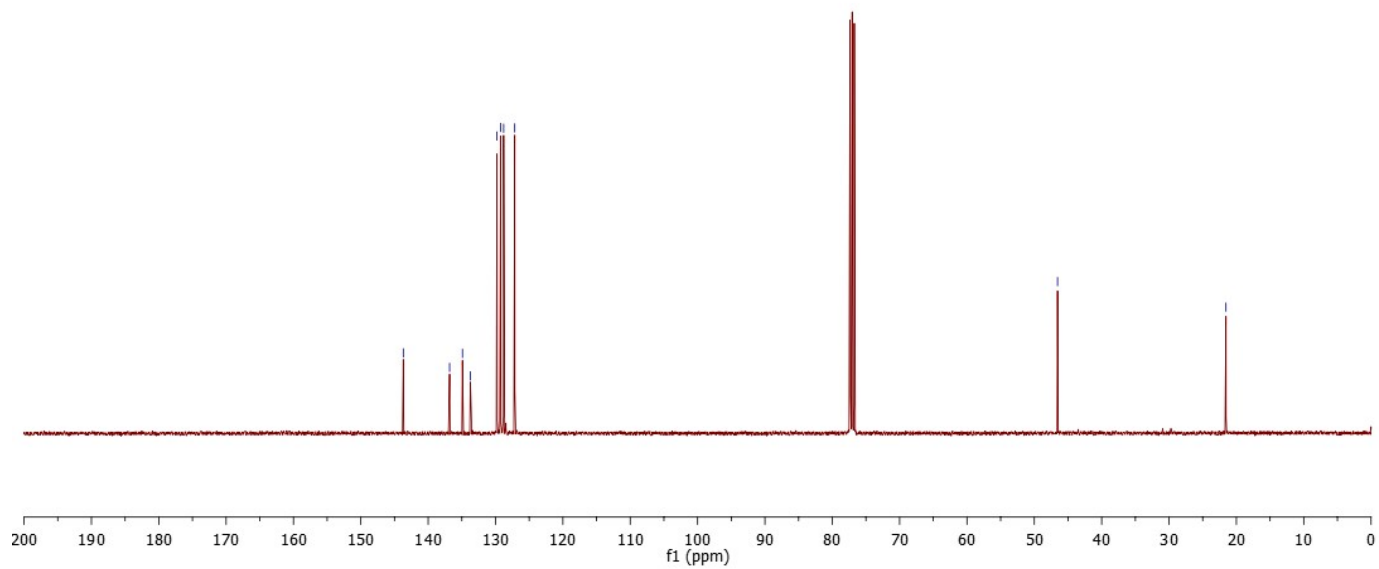

DRB-JS-63

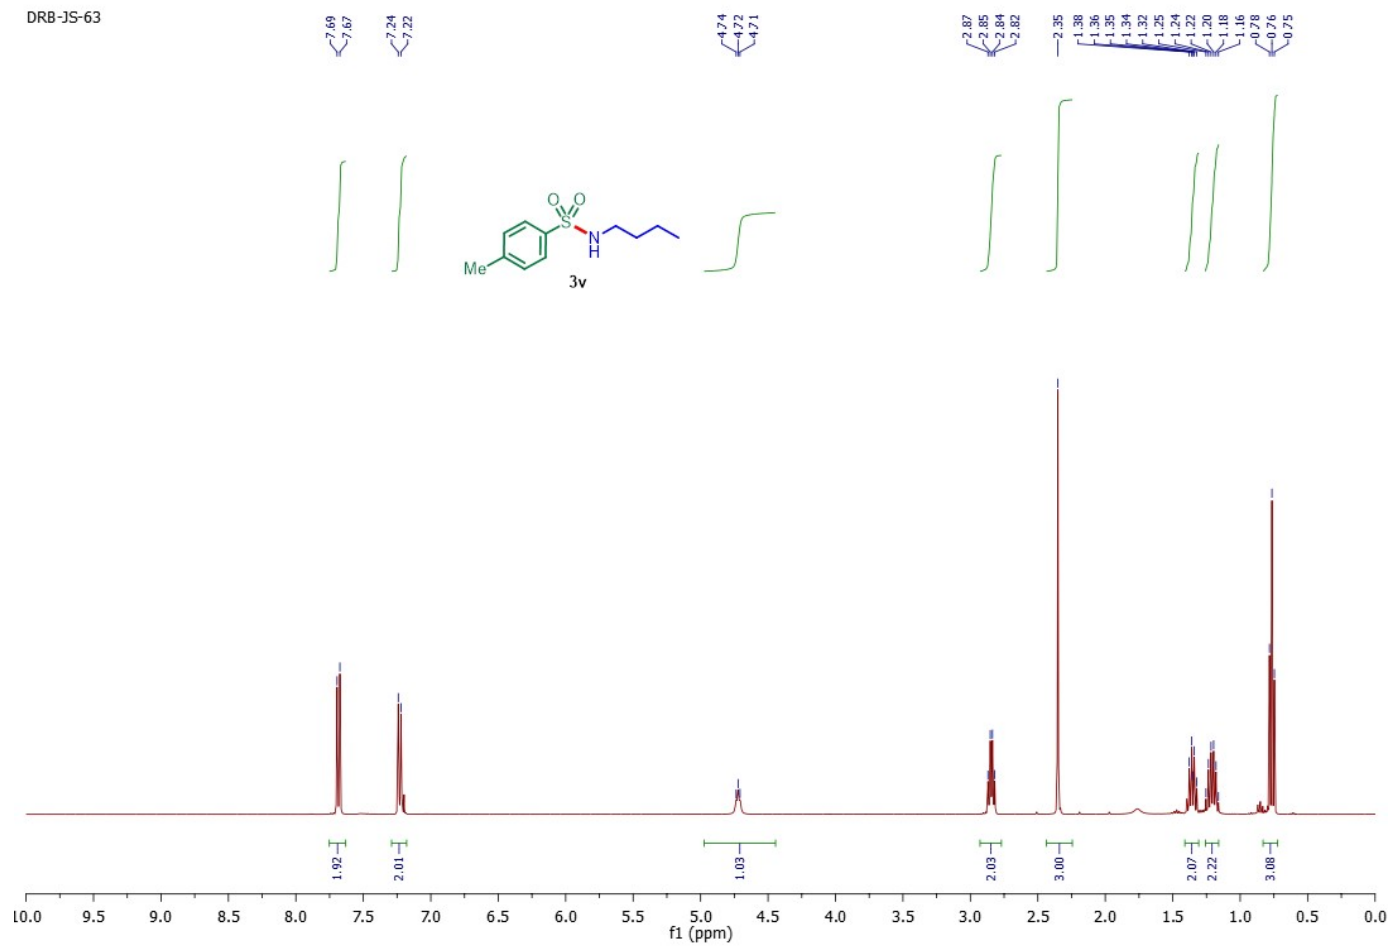

DRB-JS-63

142.27  
135.98  
128.65  
126.08

41.89  
30.53  
20.48  
18.72  
12.50

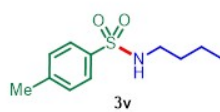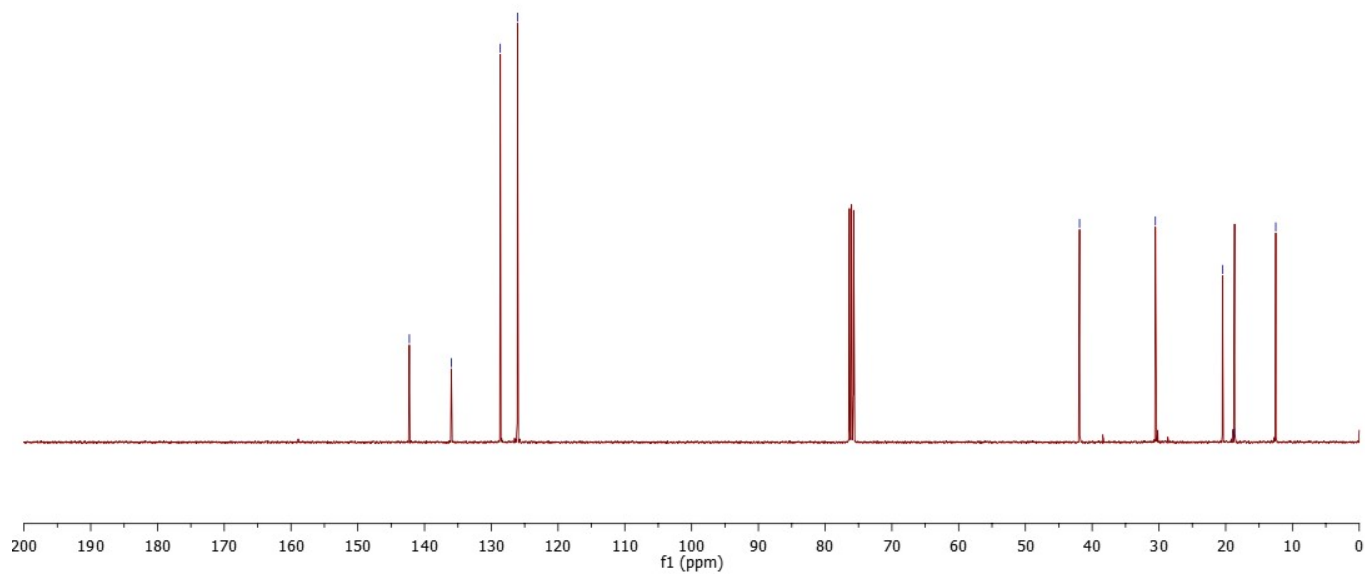

DRB-JS-110I

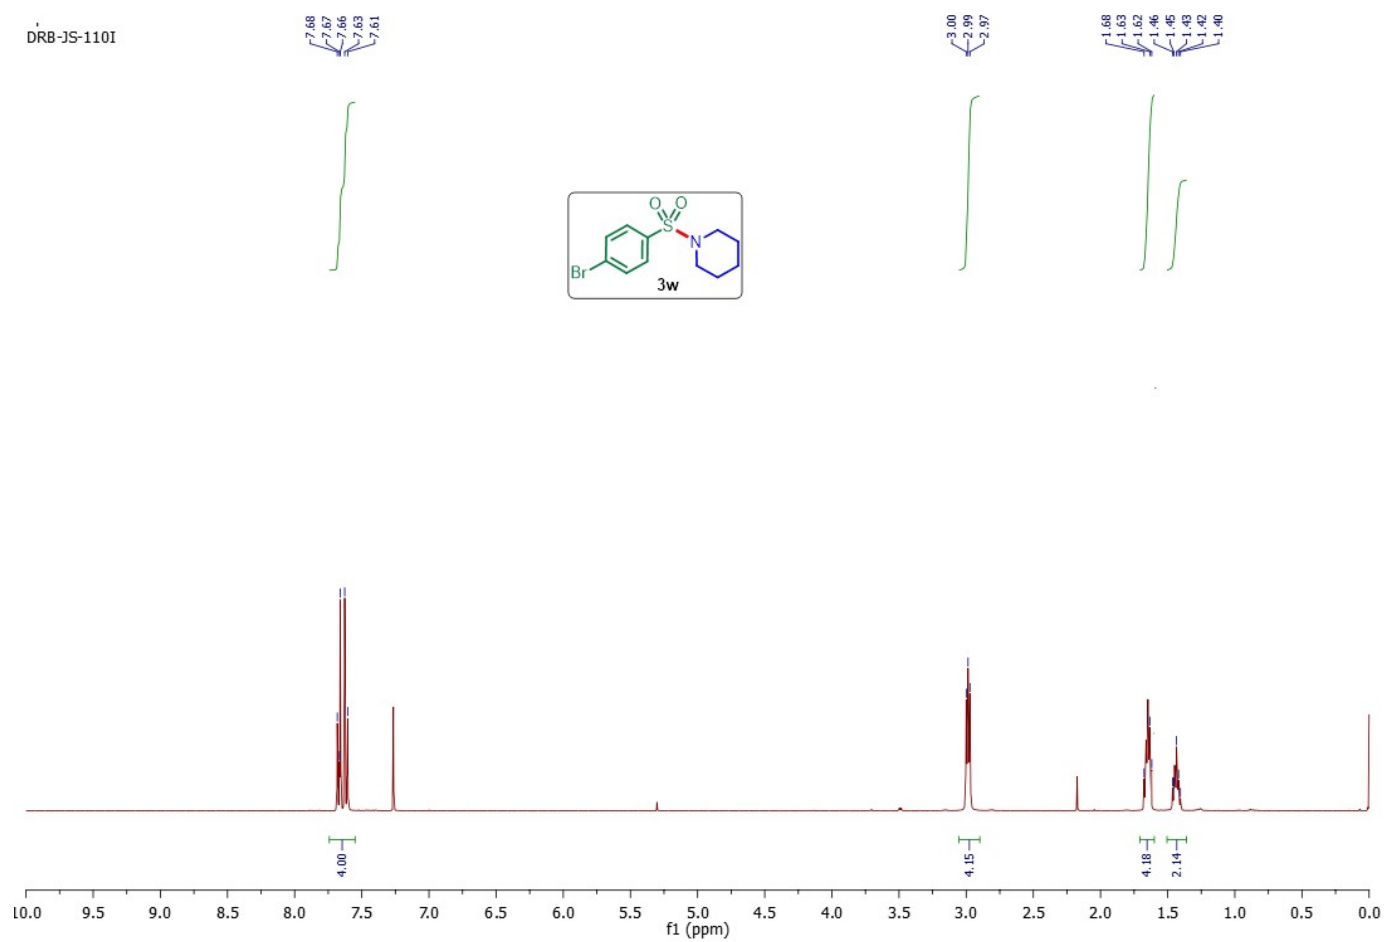

DRB-JS-110I

135.49  
132.26  
129.16  
127.59

46.92

25.14  
23.46

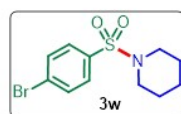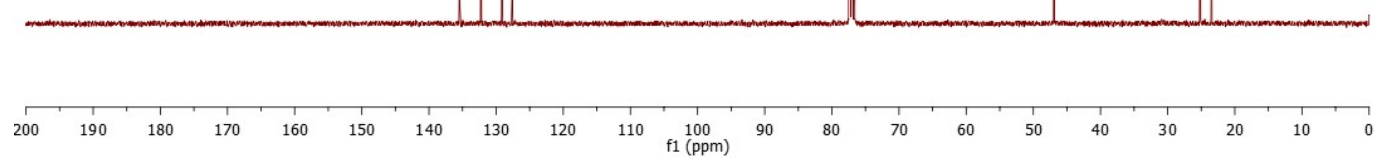

DRB-JS-120

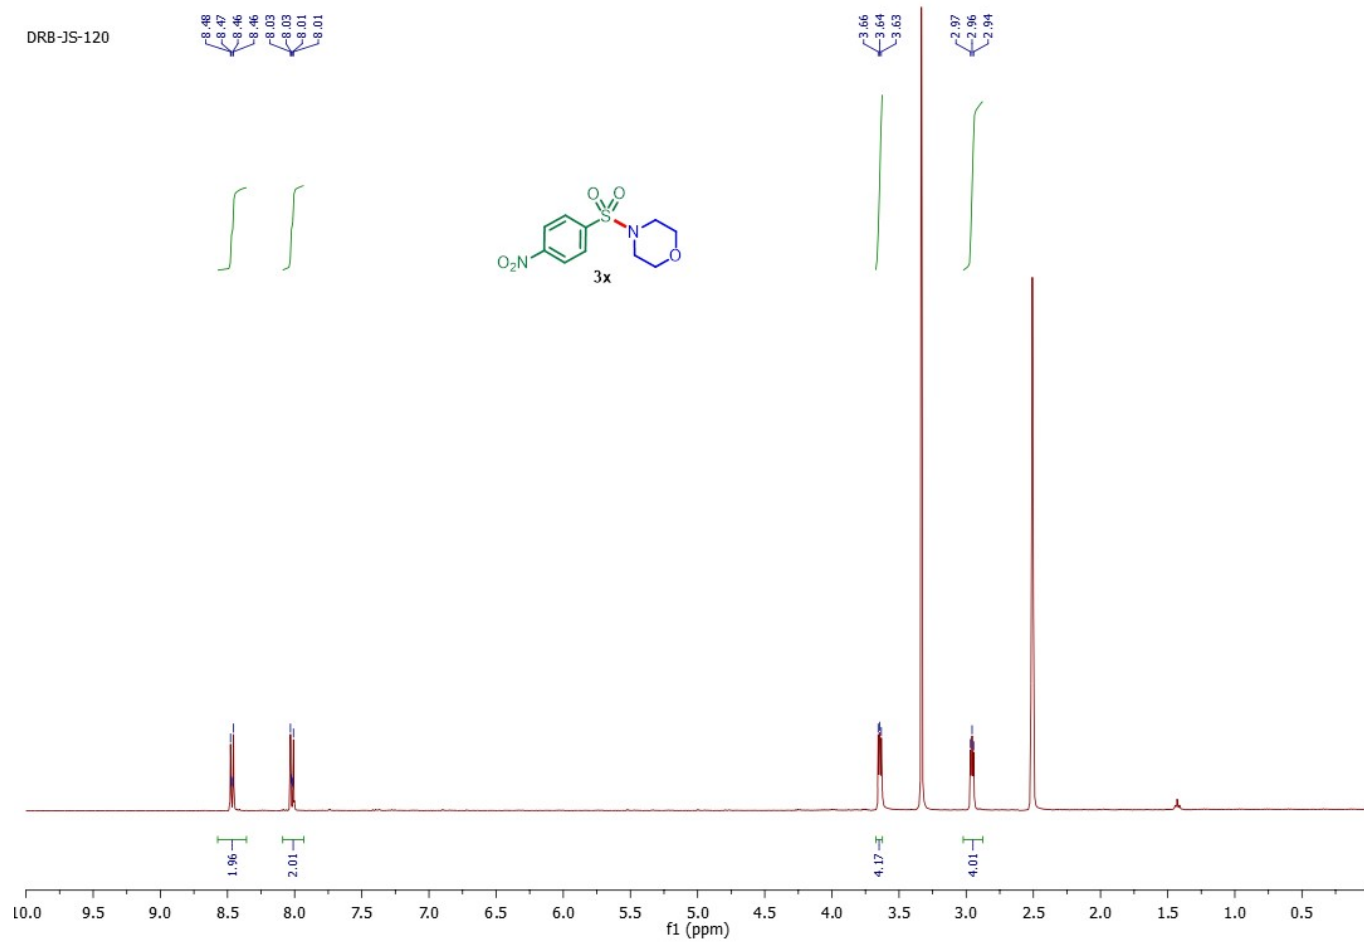



DRB-JS-120

—150.68  
—140.78  
—129.67  
—125.23  
—65.76  
—46.25

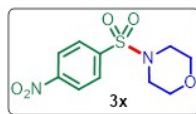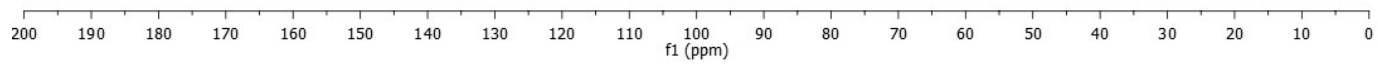

DRB-JS-169

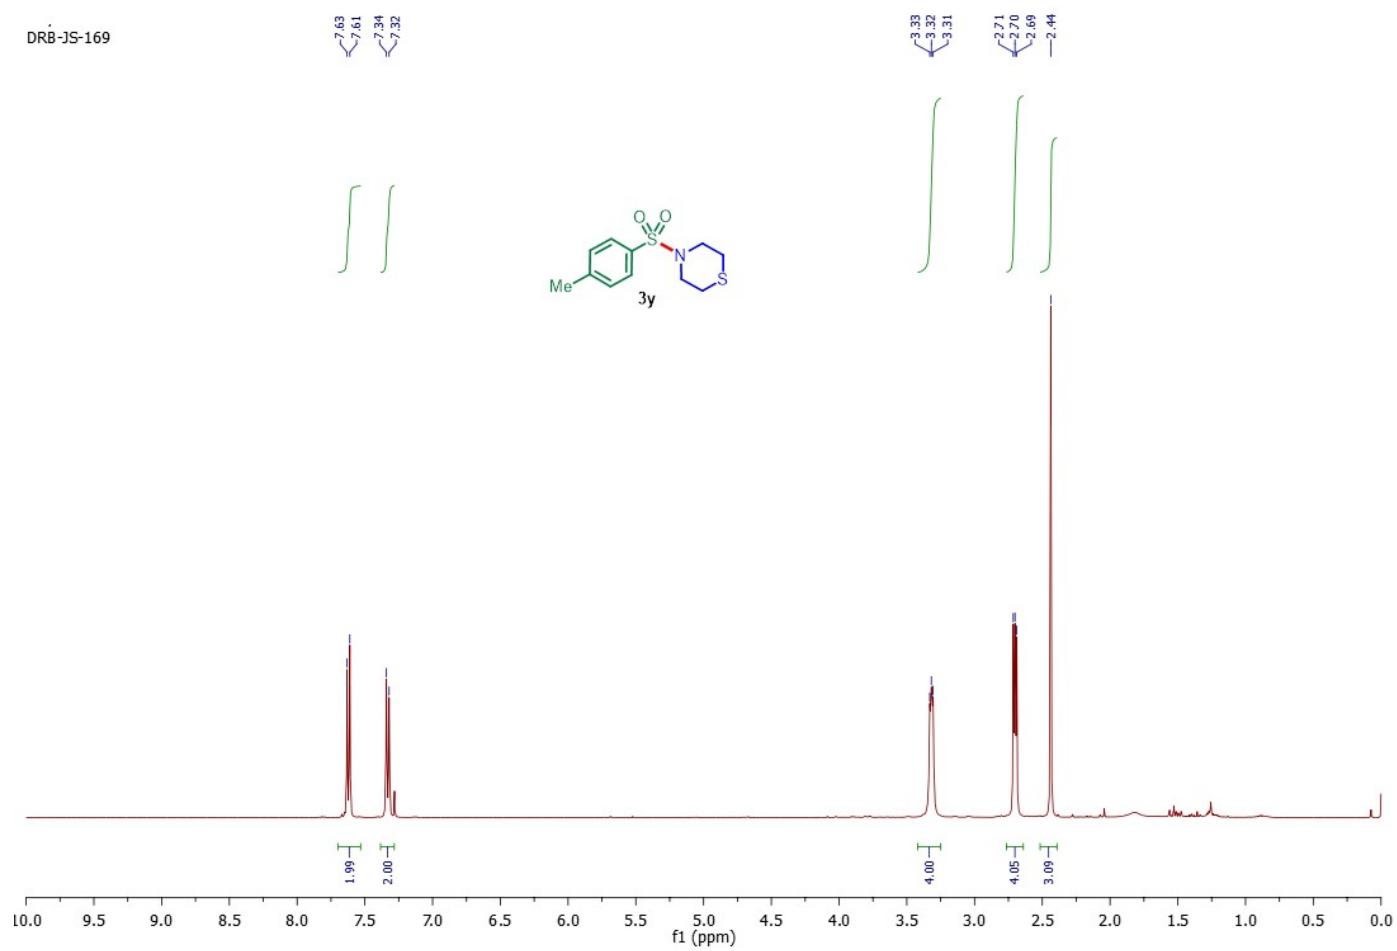

DRB-JS-169

148.78

133.74

129.81

127.44

47.86

27.32

21.53

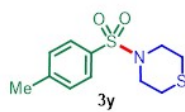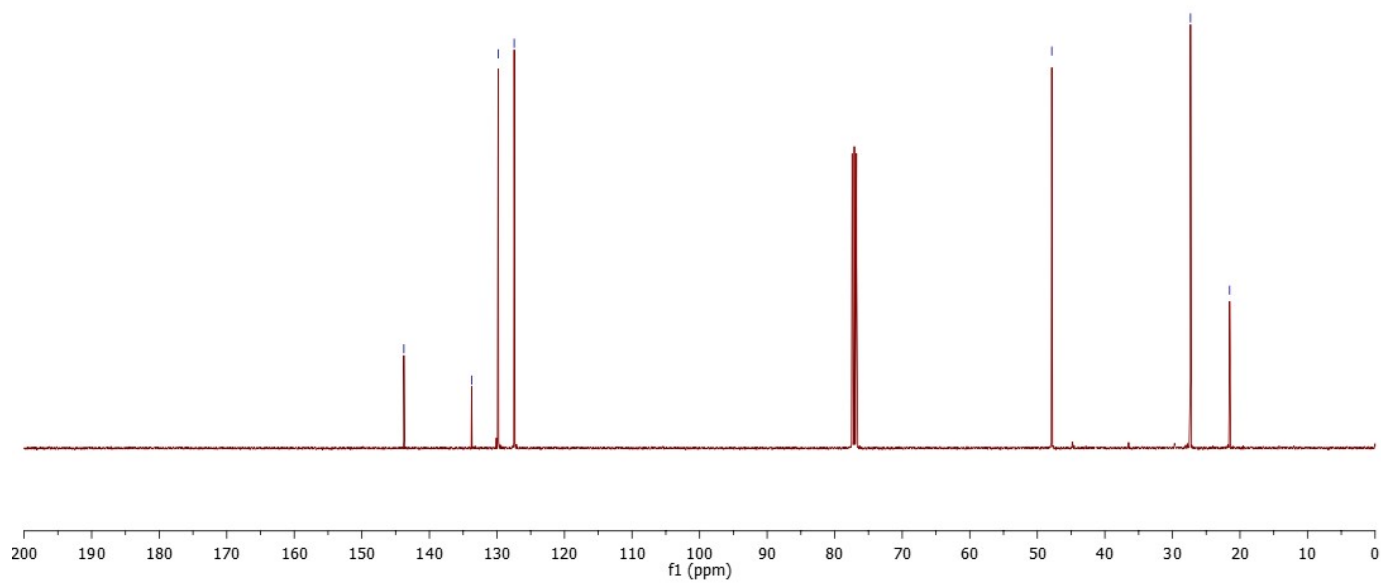

DRB-JS-170

7.70  
7.68  
7.61  
7.59

3.35  
3.34  
3.33

2.72  
2.71  
2.70

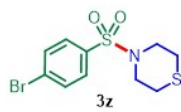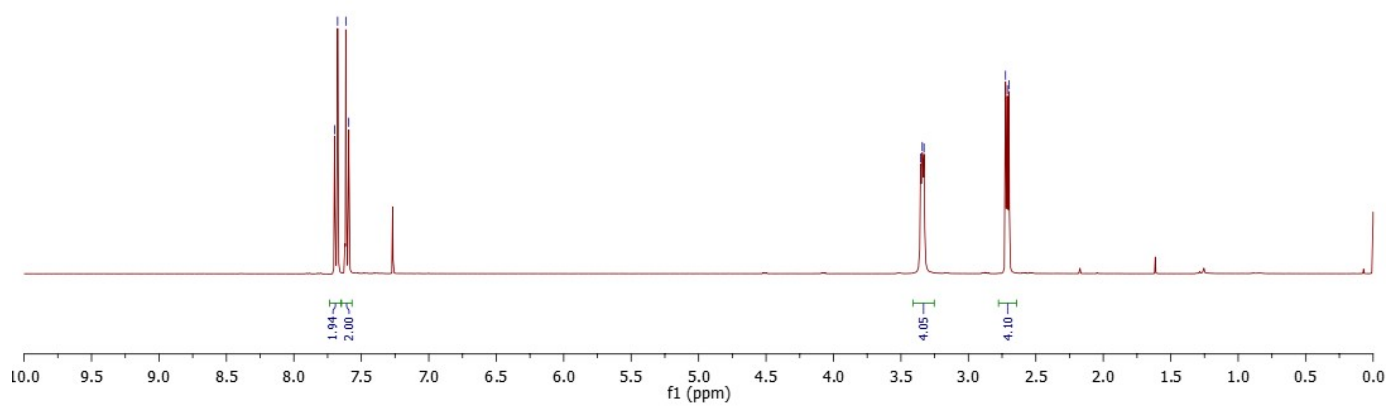

DRB-JS-170

135.96  
132.54  
128.88  
128.02

47.85

27.31

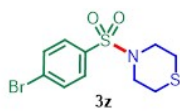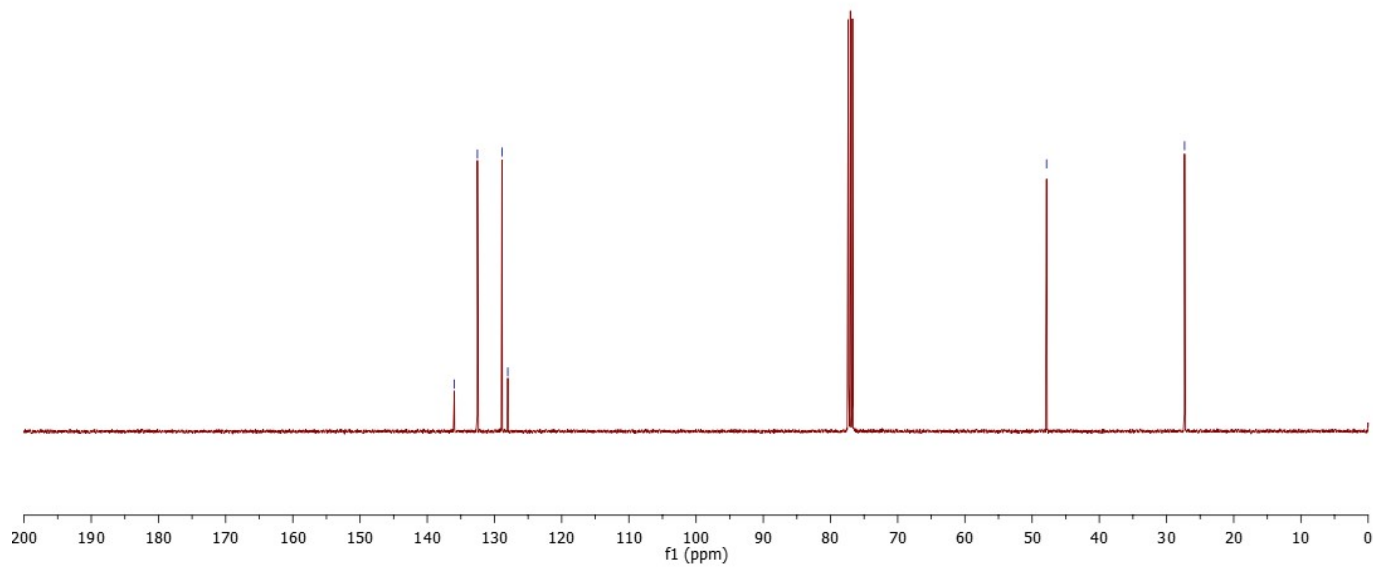

DRB-JS-182

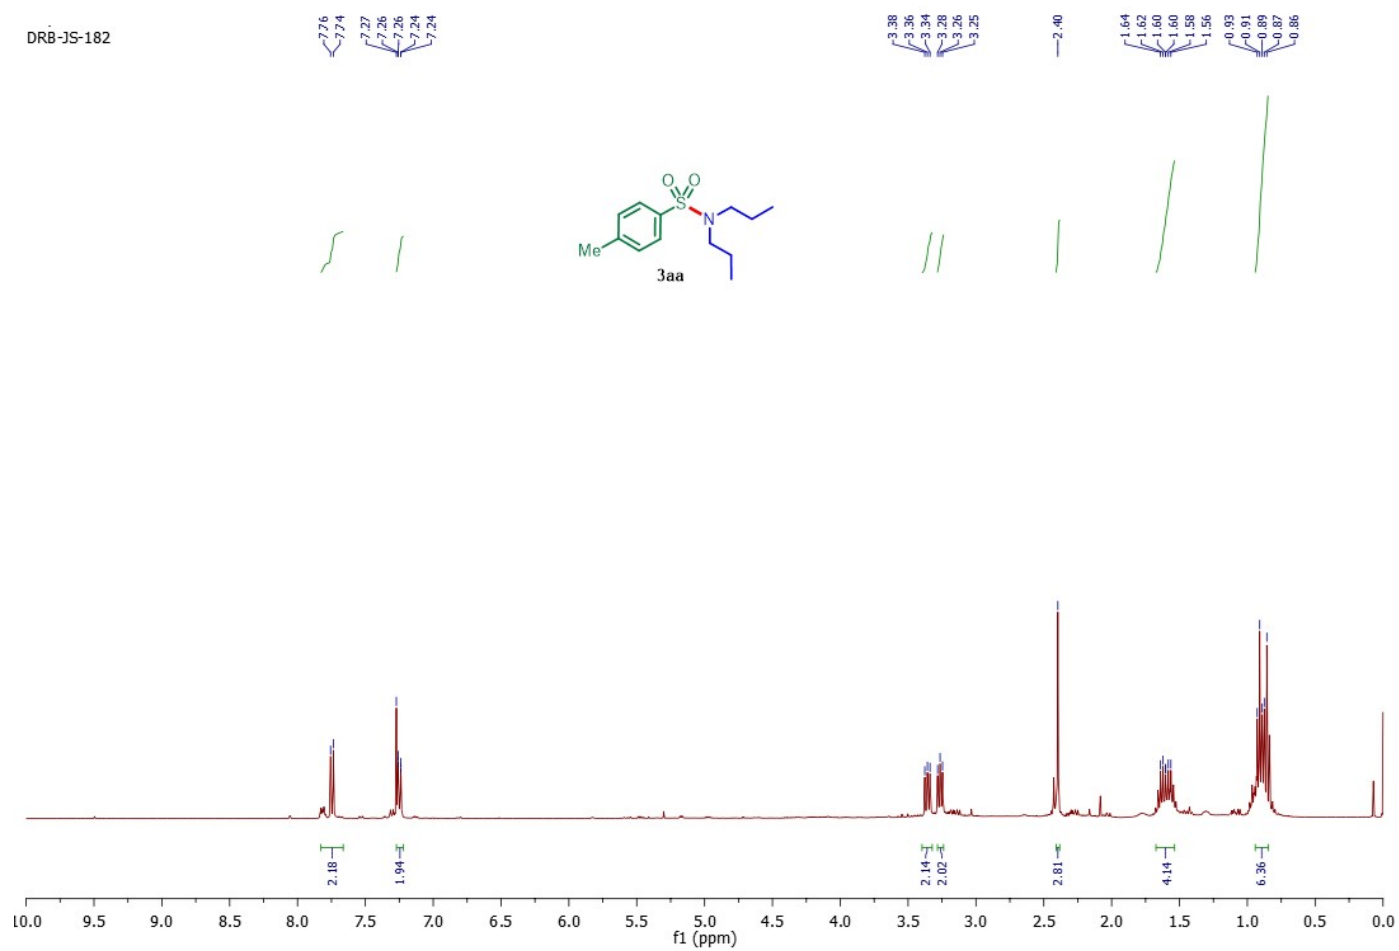

DRB-JS-182

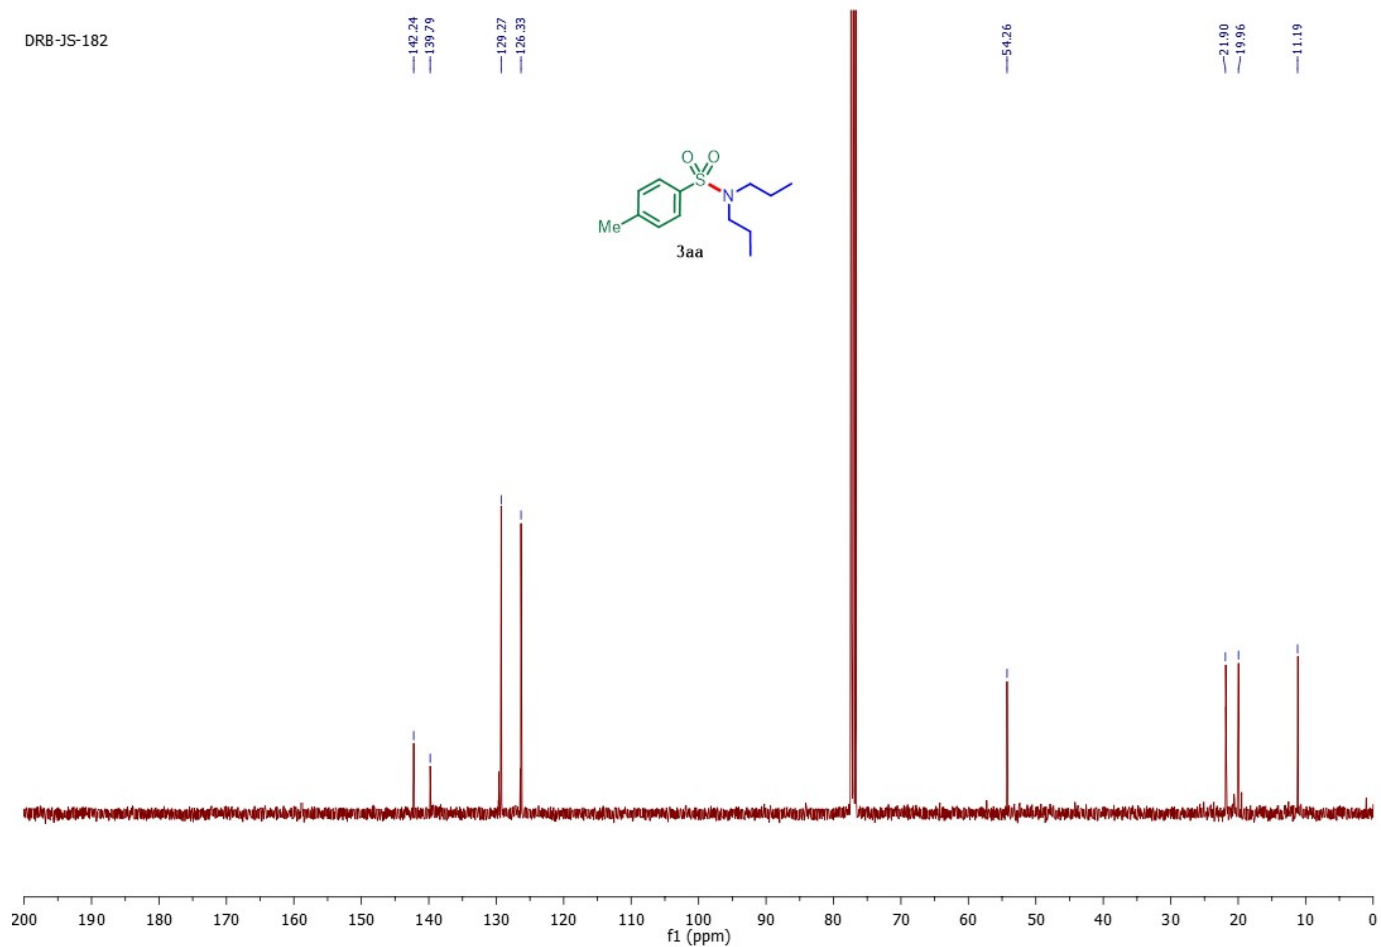

DRB-JS-34

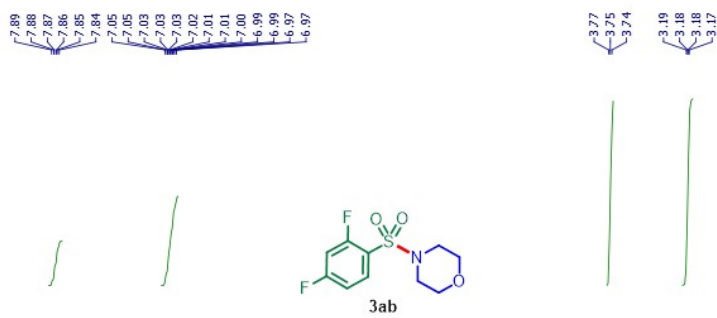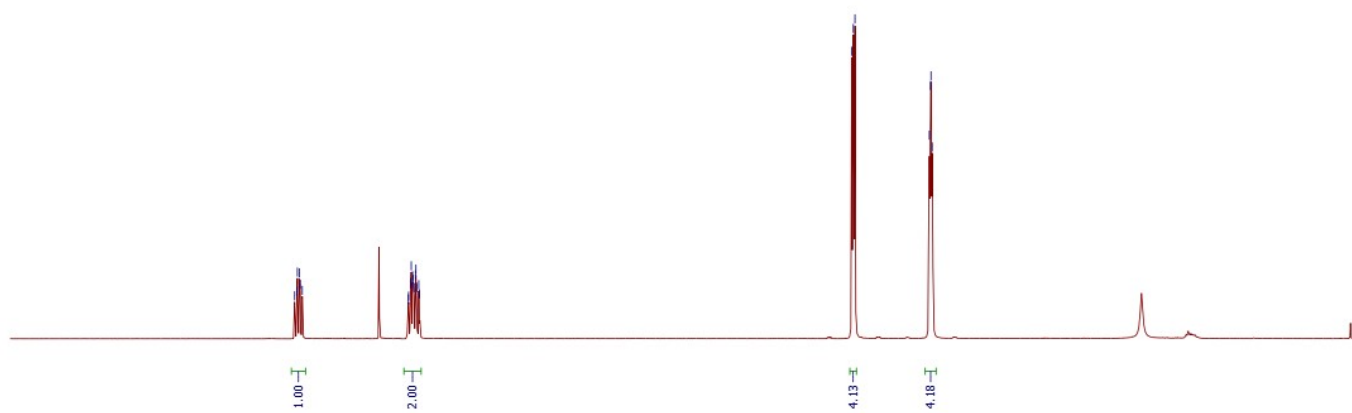



DRB-JS-34

167.25  
167.14  
164.69  
164.57  
161.24  
161.11  
158.67  
158.54

133.21  
133.19  
133.10  
133.08  
121.31  
121.27  
121.16  
121.12  
112.23  
112.19  
112.02  
106.16  
105.90  
105.64

66.31

45.76

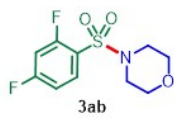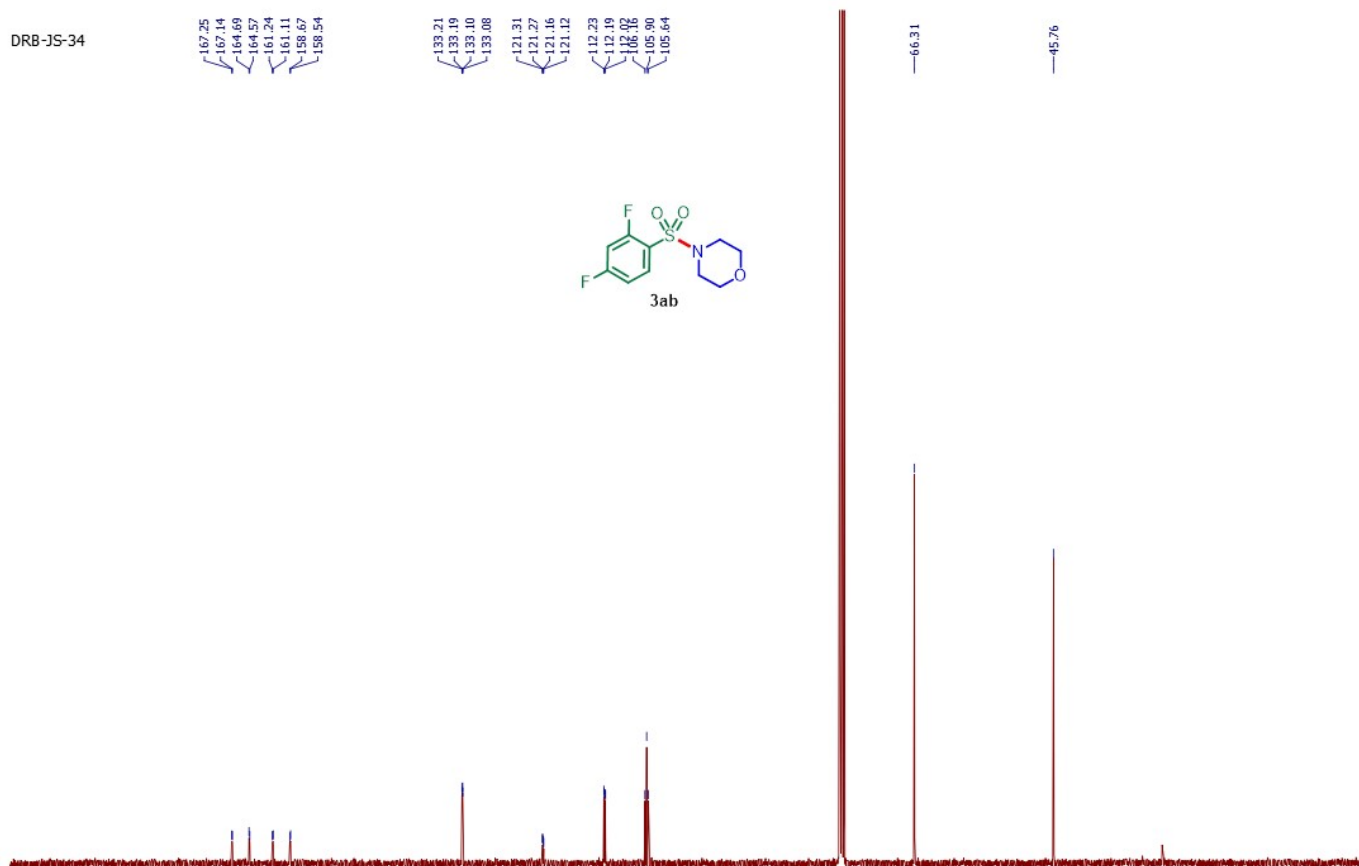

DRB-JS-35

8.26  
8.26  
8.24  
8.24  
7.69  
7.67  
7.67  
7.47  
7.45  
7.45  
7.43  
7.43  
7.39  
7.38  
7.37  
7.36  
7.35

3.79  
3.78  
3.77  
3.59  
3.57

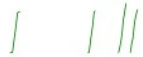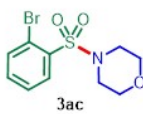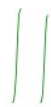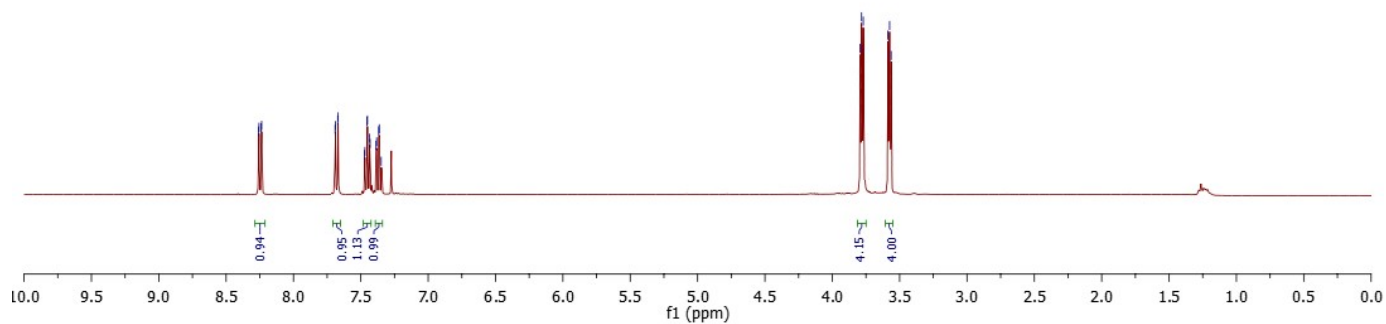

DRB-JS-35

140.39  
134.96  
133.27  
130.77  
127.71  
120.28

65.80

44.70

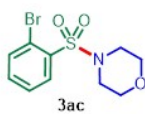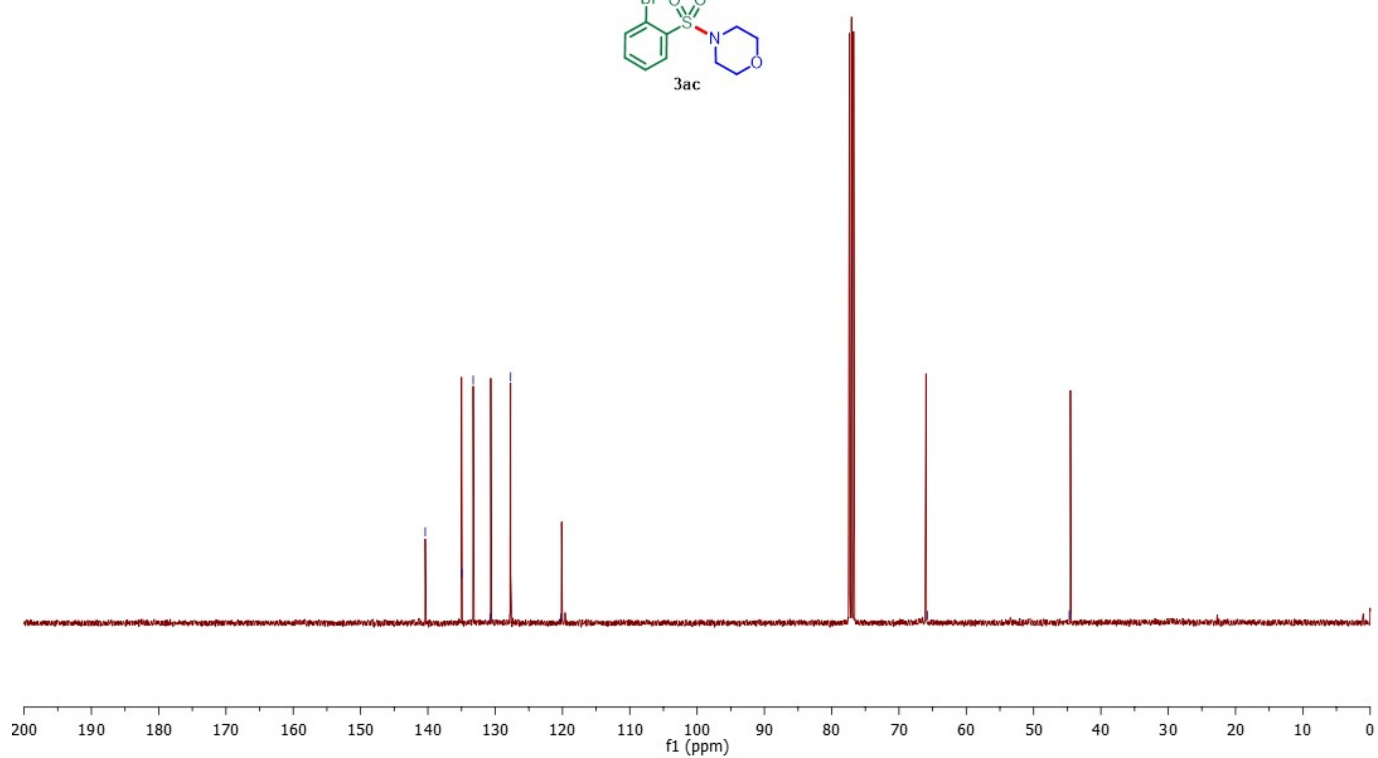

Supplement: d4ob00878b1.pdf [file d4ob00878b1.pdf]
